# Supplementary material for: A simplified and efficient extracellular vesicle-based proteomics strategy for early diagnosis of colorectal cancer
Source: Royal Society of Chemistry journal article supplement (doi:10.1039/d4sc05518g), 2024-01-01
Supplement: d4sc05518g2.xlsx [file d4sc05518g2.xlsx]

## Sheet: Table S1
Tab Name	Description
Table S2	Raw data on protein identification from different EV isolation methods
Column Name	Description
Genes	Gene names corresponding to quantified proteins
UniProt ID	UniProt ID corresponding to quantified proteins
Beads	DSPE-functionalized beads
Kit	commercial kit for polymer precipitation method
UC	ultracentrifugation
SEC	size-exclusion chromatography
Genes	UniProt ID	Beads_1	Beads_2	Beads_3	Kit_1	Kit_2	Kit_3	SEC_1	SEC_2	SEC_3	UC_1	UC_2	UC_3
A1BG	P04217	3520000	2540000	1640000	1270000	1270000	1190000	14200000	11700000	14000000	10400000	8960000	8820000
A2M	P01023	22700000	21300000	8720000	831000000	848000000	944000000	713000000	649000000	754000000	2020000000	2000000000	2340000000
A4GALT	Q9NPC4	720437	490605	400603
AARS1	P49588	376193	392702	387684
ABCB9	Q9NP78	1130000	1310000	1200000				1460000	1470000	1460000	1370000	1740000	1950000
ABI3BP	Q7Z7G0		67669.9	45009.3				1120000	1010000	1060000		707547
ACTA2;ACTG2	P62736;P63267	461994	275638	383068					579183	528981			401632
ACTB	P60709	4130000	4030000	3990000	3430000	2880000	2810000	2920000	4960000	3950000	3940000	3400000	4360000
ACTN4	O43707	1430000	1150000	1300000					293272
ADAMDEC1	O15204	180747	69659.5	62875.5
ADAMTS13	Q76LX8	2020000	1890000	1960000	679712	793107	945005	920796	835903	895971	659080	847569	634277
ADAMTSL2	Q86TH1	1010000	1070000	1020000				204470				1020000
ADGRF5	Q8IZF2	702324	653858	695820				482716	528405	429776
ADGRG6	Q86SQ4	1990000	1810000	1910000
ADGRL4	Q9HBW9	246551	165817	218345
ADH1A	P07327	1300000	1310000	1280000					436329		209964	300249
ADH1B	P00325	7360000	7120000	7020000		828227	647140				1150000	1110000	1280000
ADH1C	P00326	247131	327579	273953
ADH4	P08319	11800000	12500000	11700000	824113	751311	752882	3130000	3470000	5370000	1620000	1090000	2280000
ADH5	P11766	731409	759220	602678
ADH6	P28332	1050000	948029	999207			1420000		1510000		1160000	890824
ADIPOQ	Q15848	124744	167262		2600000	2400000	2700000	490881	518194	356190	633351	604194	848712
ADIRF	Q15847
AFM	P43652	13900000	13700000	13000000	1910000	2120000	1820000	18200000	14200000	17600000	23800000	20100000	23100000
AGT	P01019	11100000	9500000	9760000	1610000	1830000	1290000	3610000	4060000	4180000	4510000	4730000	4750000
AHCY	P23526	328388	249075	313957
AHSG	P02765	16100000	20000000	13800000	2490000	2480000	2480000	11400000	11700000	11600000	20300000	21000000	21600000
AKR7A3	O95154	525493	494862	565887
ALB	P02768	1100000000	1610000000	980000000	289000000	256000000	223000000	636000000	857000000	894000000	1420000000	1590000000	1600000000
ALDH1A1	P00352	254076	272039	260662								545105	193431
ALDOA	P04075	666082		654105				748544	636608	691471
ALDOB	P05062	1080000	880079	682387								565567	335813
ALPL	P05186		90448.4	130936				499013	336838	371680	277940	191997	289353
AMBP	P02760	29100000	28800000	25100000	23100000	24500000	24000000	25700000	26200000	31200000	24900000	27000000	25200000
ANG	P03950	329167	484955	452136			474383
ANGPTL3	Q9Y5C1	4240000	4160000	4070000		1370000			305538	228449	754407		417522
ANGPTL4	Q9BY76	818173	757867	840249
ANGPTL6	Q8NI99	929217	930826	800311	916113	575202	597192	1260000	1180000	1160000	880103	734297	1210000
ANGPTL8	Q6UXH0	632746	595978	565763								2790000
ANKRD18A;ANKRD20A1;ANKRD20A2P;ANKRD20A3P;ANKRD20A4P;ANKRD20A8P	Q4UJ75;Q5CZ79;Q5SQ80;Q5TYW2;Q5VUR7;Q8IVF6							607460	533651		650271	588970
ANPEP	P15144	1320000	1200000	1370000			1180000	6280000	5740000	6110000	5290000	3740000	6170000
ANTXR1	Q9H6X2	2140000	1950000	2020000		194340			146341
ANTXR2	P58335	3920000	3770000	3840000	264567			484885	1320000	527090	189604	285849	1990000
ANXA1	P04083			60274.9					65621.8
ANXA2	P07355	143669	265181	307285		264904		697980	744537	418021
AOC3	Q16853							238653	268547	264659	426919	544423	389562
APCS	P02743	2140000	2180000	1520000	22200000	23700000	26500000	5720000	7100000	7130000	14000000	16900000	12800000
APLP1	P51693	110895	103065	66514.6				341505		397383
APMAP	Q9HDC9	33000000	31900000	29500000	1500000	1190000	1110000	2810000	2460000	3020000	2790000	2120000	2810000
APOA1	P02647	1690000000	1770000000	1510000000	17500000	45300000	18700000	90200000	123000000	143000000	79400000	63900000	89800000
APOA2	P02652	118000000	141000000	119000000	1980000	10100000	1630000	5050000	6110000	6480000	5290000	3800000	5660000
APOA4	P06727	118000000	113000000	109000000	2390000	5250000	1860000	1870000	1300000	2050000	3010000	2210000	4350000
APOA5	Q6Q788	23900000	22300000	19900000	189378	214346	244459	2440000	2160000	2390000	2550000	1990000	2500000
APOB	P04114	229000000	231000000	211000000	305000000	313000000	316000000	493000000	448000000	502000000	44000000	42800000	58300000
APOC1	P02654	204000000	213000000	195000000	3930000	10800000	4150000	7880000	9140000	10700000	9450000	6110000	9870000
APOC2	P02655	36500000	32300000	32000000	3220000	4190000	3380000	12700000	10300000	9950000	4040000	3350000	3830000
APOC3	P02656	230000000	235000000	235000000	11700000	18300000	13100000	19900000	18900000	22400000	25600000	19200000	24100000
APOC4	P55056	6040000	6260000	4960000	1010000	1250000	845847	22800000	14300000	21700000	1050000	701260	947893
APOD	P05090	312000000	331000000	303000000	10600000	11000000	11400000	3470000	6590000	4920000	12700000	13800000	14400000
APOE	P02649	1080000000	1310000000	893000000	44800000	37900000	41200000	208000000	185000000	220000000	39500000	33400000	38600000
APOF	Q13790	5030000	4950000	5050000	1550000	1040000	1430000	1530000	1570000	1320000			740215
APOH	P02749	3120000	6520000	2840000	6620000	6660000	6160000	10400000	11000000	12200000	7530000	6190000	6540000
APOL1	O14791	70100000	71100000	69300000	12200000	11500000	12900000	23400000	22700000	24300000	34000000	29300000	33400000
APOL2	Q9BQE5	151338	149884	127624
APOM	O95445	11900000	10000000	10100000	4200000	5160000	4470000	8380000	7410000	8930000	1280000	957095	1620000
APP	P05067							558274	522982	446280
APRT	P07741	438466	403778	368528
ARF1;ARF3	P61204;P84077	5450000	5630000	4710000	177954	182076		516214	524628	491208	410429	381594	695456
ARF4	P18085	9500000	9600000	9520000
ARF5	P84085	594948	447581	604211
ARF6	P62330	340201	386643	367763					265824
ARG1	P05089		215823	410609				701537	555821	581154
ART4	Q93070	207240		214903
ASGR2	P07307	5730000	5390000	4500000
ASPN	Q9BXN1	2120000	2180000	2200000								501215
ASS1	P00966	1800000	1650000	1700000	442655	395033	596506				568630
ATG3	Q9NT62
ATP5F1A	P25705	226204		288031
ATP5F1B	P06576	219803	277426	235575					146371
ATP8A1	Q9Y2Q0	1780000	2420000	2650000	5630000	6440000	7960000		1790000	1060000	607204	712562	1330000
ATRN	O75882	1100000	1010000	1010000		588645		3020000	3110000	3180000	3040000	3120000	3350000
AZGP1	P25311	965658	836419	621181	1080000			655247	641267	838830	1180000	1180000	1300000
B2M	P61769	452294	329872	277519							770269
B3GALNT1	O75752		152454	195455
B3GNT7	Q8NFL0
B4GALT1	P15291	491500	393810	416652				65167.8		90589.4
BCHE	P06276	18100000	14900000	15300000			1080000	3090000	3060000	3170000	3480000	3440000	3890000
BLMH	Q13867	1300000	1730000	1390000	444701	391898		2180000	2440000	1610000	1570000	1770000	2150000
BLVRB	P30043	3760000	3210000	3120000		3200000					1690000	2250000
BMP1	P13497	941692	886950	824701	1990000
BNC2	Q6ZN30	55400000	56900000	47100000	1280000	1850000	1170000	4810000	5240000	6330000	3560000	2740000	2690000
BPI	P17213	634135	787791	676531
BPIFA1	Q9NP55				1470000
BPIFB1	Q8TDL5	5820000	5500000	5950000	1490000	1570000		3260000	792765	3290000	1120000	1180000	676420
BPIFB2	Q8N4F0	627873	180287							111711			246902
BTD	P43251	1220000	669870	544379				1450000	1520000	1480000	1970000	1440000	1700000
C1QA	P02745	5130000	6140000	5580000	91800000	107000000	105000000	23200000	26200000	30400000	109000000	95600000	117000000
C1QB	P02746	6810000	6730000	4870000	123000000	132000000	145000000	28400000	32900000	37400000	156000000	132000000	150000000
C1QC	P02747	3080000	3380000	2400000	109000000	118000000	130000000	22400000	27200000	33700000	106000000	97100000	108000000
C1QTNF3	Q9BXJ4							1000000	1110000	1030000	1960000	2020000	2440000
C1R	P00736	157000000	160000000	148000000	28300000	29400000	33100000	33800000	28000000	32500000	33700000	33400000	37500000
C1RL	Q9NZP8	24700000	26600000	25400000	10900000	10300000	7550000	25300000	22200000	26900000	21400000	18600000	17200000
C1S	P09871	63200000	62600000	58100000	21000000	25600000	23400000	8140000	8570000	8970000	8910000	8620000	9080000
C2	P06681	5020000	4710000	4660000	3270000	3680000	3870000	2630000	2850000	2870000	4020000	4500000	4090000
C3	P01024	22600000	26600000	12500000	1600000000	1560000000	1700000000	77200000	87500000	94300000	267000000	302000000	259000000
C3orf85	A0A1B0GTC6	300647	355088	308261
C4A	P0C0L4	6510000	5030000	3950000	66900000	72600000	80200000	12400000	12000000	13400000	30400000	35600000	31600000
C4BPA	P04003	25700000	19000000	13500000	302000000	291000000	320000000	174000000	193000000	192000000	221000000	194000000	230000000
C4BPB	P20851	957001	723554	545031	9220000	10000000	11000000	12500000	14500000	14400000	11400000	11600000	11900000
C4B_2	P0C0L5	15400000	13300000	9270000	272000000	285000000	286000000	26600000	29300000	31100000	88400000	95900000	90000000
C5	P01031	4910000	4870000	4560000	67700000	65900000	73200000	5530000	6000000	6290000	18600000	20300000	18500000
C6	P13671	1650000	2690000	1440000	53500000	54900000	59400000	5540000	5680000	5640000	8550000	9500000	8890000
C6orf120	Q7Z4R8											625421
C7	P10643	18800000	17400000	16900000	29300000	29900000	33000000	2410000	3000000	2950000	5990000	6750000	5830000
C8A	P07357	2070000	2430000	2050000	38500000	38000000	42400000	2830000	3210000	3550000	12700000	13700000	12600000
C8B	P07358	1080000	1040000	857399	18000000	18300000	19500000	1490000	1610000	1700000	6330000	6450000	6180000
C8G	P07360	1880000	1990000	1410000	22300000	24300000	26100000	2340000	2270000	2680000	7790000	8200000	8220000
C9	P02748	14400000	16200000	13200000	45900000	45700000	51100000	5890000	6130000	6610000	12100000	14300000	13700000
CA1	P00915	190834	171067					676890	674464	770887	844181	946820	880084
CA6	P23280	390658	441170	392477							70142.6
CAB39	Q9Y376	430617	357714	360783					341815			548361
CAMP	P49913	6380000	5510000	4230000	591307	492657	339045	4770000	4190000	5230000	882984	599085	523279
CAND1	Q86VP6	1000000	1020000	946442
CAPN1	P07384	2010000	2120000	2080000				2630000	1460000	1590000	2070000	320778	1180000
CAPN2	P17655	311396	206143	304549
CAPNS1	P04632	1010000	1000000	1040000
CAT	P04040			105883	869113	835294	744825	690863	497673	620043	1430000	1390000	1460000
CC2D2B	Q6DHV5	205919	1850000	2230000								960989
CCDC126	Q96EE4	192851	208655	216672
CCDC65	Q8IXS2	673893	942482	670957				1750000	870702	1190000	803655	638668	763951
CCDC74B	Q96LY2	526614	399931	397229							666367
CCT2	P78371	680978	746509	623417
CCT3	P49368	708095	691434	733872							287168	237899	319595
CCT4	P50991	562349	519159	589655				725251			447989	228348	155094
CCT5	P48643	558107	502448	513141
CCT6A	P40227	437203	401118	421259							552385
CCT6B	Q92526			448726
CCT7	Q99832	1050000	1050000	1100000							1400000	1340000
CCT8	P50990	602802	569034	549198
CD14	P08571	6010000	4210000	4890000				1440000	946576	1300000	1150000	870548	1190000
CD163	Q86VB7				224099	243638	243216	464605	321100	339406	479099	455030	473606
CD1D	P15813	654652	573824	349721
CD209;CLEC4M	Q9H2X3;Q9NNX6	887797	1000000	1070000
CD36	P16671							718870	819838	971785	988870	823037	1210000
CD44	P16070	812145	1010000	778407					468140	410544	162413	227079
CD5L	O43866	9620000	9750000	8900000	84800000	87500000	94500000	86300000	82700000	87600000	232000000	200000000	251000000
CD81	P60033							2290000	3530000	2020000
CD9	P21926										252296	269678	538229
CDH1	P12830	1490000	1640000	1510000		814915		903366	489752	622984	540383	524044	701613
CDH11	P55287	409687	440757	358614		250448		148988
CDH5	P33151	9060000	8170000	8330000	1130000	904418	1070000	1070000	1310000	1370000	1620000	1370000	1300000
CDH6	P55285	591129	513416	511169
CDHR5	Q9HBB8	300595
CEBPZ	Q03701
CELA3A	P09093	370974	330072	413195					533695
CES1	P23141	338327		264765	532024	549578	498215	547864	554849	608667		375929	342998
CETP	P11597	36700000	42100000	35000000	1500000	1700000	1190000	1880000	861474	925864	1190000	1140000	2070000
CFB	P00751	3560000	4720000	2030000	17000000	18100000	17700000	8700000	10700000	11100000	18800000	22500000	21100000
CFD	P00746	1770000	1670000	1690000				210357			391882	410392	724341
CFH	P08603	5620000	8300000	5150000	176000000	184000000	202000000	21700000	22700000	24400000	23900000	27000000	23100000
CFHR1	Q03591	2480000	4550000	2490000	16000000	18000000	19200000	1900000	2690000	3080000	5310000	5440000	5650000
CFHR2	P36980	280372	382186	205848	1810000	2010000	2110000	615861	663389	697220	496473	553542	408132
CFHR3	Q02985	102211	80386.8		856101	805658	795502	477590		694695	343403	364121
CFHR4	Q92496	1260000	1070000	1030000	1850000	2030000	1960000	982995	1280000	1220000	1180000	1400000	1060000
CFHR5	Q9BXR6	740770	948121	788078	3690000	3840000	4200000	522519	689007	841997	1860000	1900000	1750000
CFI	P05156	1430000	1990000	1060000	15900000	16800000	18400000	2580000	2850000	2980000	7550000	7990000	7700000
CFL1	P23528	1420000	1600000	1330000				371308	619560	536613	364933		564078
CFP	P27918	631717	632190		4330000	5290000	5190000	3740000	3920000	4450000	4140000	4360000	3310000
CHGA	P10645	838442	826547	739039
CHL1	O00533							633472	540374	590965
CHST12	Q9NRB3	450986	362481	394998
CHST14	Q8NCH0	545828	541497	503828
CIDEB	Q9UHD4	606624	723990	645870
CLEC11A	Q9Y240	1010000	825847	871123						694886
CLEC3B	P05452	1470000	1920000	1450000	767344	783800	864296	1020000	1090000	1120000	907564	909780	1140000
CLIC1	O00299	683704	588566	613888
CLSTN1	O94985	416855	298312	354050
CLTC	Q00610	93981						570598	614367	641827	445882	423358	490094
CLU	P10909	264000000	271000000	229000000	5000000	7900000	5470000	24000000	22000000	27700000	15800000	13700000	14600000
CNDP1	Q96KN2	9320000	9380000	8520000	925485	609236	822451	1070000	1120000	1260000	1460000	1490000	1360000
CNDP2	Q96KP4	534291	619849	481665
CNNM2;CNNM4	Q6P4Q7;Q9H8M5				555159	585478	578710	921382	1180000	905354	2010000	1680000	2000000
COL18A1	P39060	1160000	1150000	901790				424249
COL1A2	P08123							1890000	1710000	2130000
COL28A1	Q2UY09	939991	871032	856006	433851	457926	411513			1080000
COL4A1	P02462							449279	329907	341889
COL4A5	P29400	271374	271740	293724						619290			490870
COL6A1	P12109	278410	259779	304405	540459	562728	383023	1360000	907899	1220000	717323	669270	637659
COL6A2	P12110							1800000	1400000	1670000
COL6A3	P12111	1090000	1040000	983422	2010000	1860000	2710000	3800000	3430000	3690000	1760000	1650000	1410000
COLEC10	Q9Y6Z7	5180000	5050000	4700000	832657	824697	781964	1640000	1680000	1650000	1230000	1290000	1460000
COLEC11	Q9BWP8	3980000	3490000	3560000	1030000	1100000	1100000	2250000	2200000	2080000	1530000	1610000	1340000
COMP	P49747	449999	385202	325354	1290000	1200000	1190000	1940000	1810000	1600000	481603	970145	985558
CP	P00450	6220000	6410000	4260000	37300000	40600000	39400000	16200000	18900000	19300000	37300000	44900000	40000000
CPB2	Q96IY4	15900000	15500000	14900000	3810000	3710000	3550000	1470000	1250000	1320000	2490000	2350000	2260000
CPN1	P15169	1530000	1750000	1310000	2340000	2310000	2210000	6150000	6130000	6740000	5750000	6630000	6170000
CPN2	P22792	2800000	2700000	2440000	1440000	1340000	1290000	4970000	5260000	5340000	6230000	6830000	6260000
CPQ	Q9Y646	394540	396534	439279
CPS1	P31327	3130000	2960000	3150000	713751	455483	1750000	1730000		985122	2640000	1470000	2170000
CRP	P02741	2180000	2250000	2170000	18400000	20300000	23700000	1350000	1560000	1300000	3630000	3900000	3560000
CRTAC1	Q9NQ79	7260000	6830000	6990000	1700000	1700000	1640000	884889	868752	1170000	1510000	1720000	1400000
CRYL1	Q9Y2S2	319312	284291	319481						535684			875132
CSE1L	P55060	193166	176733	144906
CSRP1	P21291	304987	341394	397477
CST3	P01034	1360000	1280000	1120000
CTSA	P10619	627833	700577	717816
CTSB	P07858	750028	737752	616496
CTSD	P07339	818144	768347	718006	1060000			732987	791229	772690	1250000
CTSF	Q9UBX1	1360000	1200000	1230000
CTSG	P08311	2370000	1900000	1640000							4290000
CXCL12	P48061	2610000	2780000	2060000
DBH	P09172	139613	111939	123478	99427.1	102427	142236	495486	467394	483959	525816	688002	541088
DCD	P81605	1230000	2400000	3350000	2080000	3620000	2430000	2090000	981365	1570000	1960000	1290000	1400000
DCXR	Q7Z4W1	390024	388736	434970							417797	281738
DDI2	Q5TDH0	323243	217846	275863
DDX46	Q7L014	7580000	5900000	6370000			241065	817038	819623	988483	576613	397613	481554
DEFA1B;DEFA3	P59665;P59666	1100000	1040000	1100000	477457		522191	523033	622327	512318		311289	718762
DEFA4	P12838		244984		490148	465511	488604			65719.9		225456
DMKN	Q6E0U4	230647	209766	208320
DNAAF1	Q8NEP3	767860	908076	677663	304256	179919	138189	857113	1360000	1040000	1460000	1350000	1530000
DNAJC3	Q13217	809458	979202	850987									178942
DOCK7	Q96N67			368910
DPH6	Q7L8W6	729176	968389	610185		237649	260346	820034		1080000	1030000		1290000
DPP4	P27487	542774	494221	472738				713691	749499	549249	939304	732503	971867
DSC1	Q08554	125289	111342	244487				537799	685783	405715		876758	457502
DSC2	Q02487	393872	432225	357231							1010000
DSC3	Q14574	210473	217026	258858
DSG1	Q02413	82622.1	85989.4	276194				453844	435684				133078
DSG2	Q14126	5760000	5520000	6010000	1440000	4420000	5320000	2560000	752608	2460000	3260000	873314	304922
DSP	P15924	329797	368471	747752	480256	485976	603425	685937	1450000	324559	287258	290395	363028
DSTN	P60981	649493	603462	545665
DYRK1B	Q9Y463	558852	537717	538134				171821		134437
ECM1	Q16610	478949	798670	399843	2230000	2300000	2320000	1220000	1340000	1380000	4160000	3740000	3080000
EEF1A1;EEF1A1P5	P68104;Q5VTE0	3640000	3700000	3410000	1120000	998374	1510000	862180	1400000	727800	1140000	1060000	1240000
EEF1A2	Q05639	65092.4							97378.2
EEF1G	P26641	402601	319445	300970		190647	224416		101083
EEF2	P13639	461281	495933	362648	829444
EFEMP1	Q12805	3030000	2060000	2520000	1830000	1880000	2040000	838356	854461	902154	1450000	1900000	1680000
EFHD2	Q96C19	377082	332422	398772
EHD1	Q9H4M9	311300	307867	277897					430364	211452
EIF2S1	P05198
EIF5A	P63241	449456	638267	409116
ENO1	P06733	6420000	6590000	6430000	203130	771448	546437	1200000	915641	1230000	1090000	1200000	1010000
ENO3	P13929	544353	534474	576659
ENPP1	P22413	63043.4	74285.1	70148.9
ENPP2	Q13822	961860	918276	957024
ENTPD5	O75356	492751	470890	475746
EPHX2	P34913	233624	244306	285394
EPPK1	P58107				1170000		866490	633415	541761	587573	755278	776533	990414
ERP44	Q9BS26	142428	175905
ETF1	P62495	436348	278767	401761
EXTL2	Q9UBQ6										245366	141017	125558
F10	P00742	1790000	1950000	1650000	1360000	1370000	701864	1780000	1960000	1850000	1650000	1980000	1920000
F11	P03951	853665	789680	789515	5550000	5600000	6330000	594041	1530000	1700000	3170000	2880000	2920000
F12	P00748	798530	1850000	973088	2360000	2550000	2380000	1970000	2110000	2120000	4370000	4980000	4320000
F13A1	P00488	808046	1090000	885903	3560000	3410000	3560000	4480000	4410000	4700000	11000000	10300000	10700000
F13B	P05160	802618	1380000	815771	3670000	3700000	3630000	2090000	2110000	2320000	6710000	6630000	5730000
F2	P00734	4470000	7230000	4470000	41200000	42800000	45800000	5060000	6210000	5860000	12500000	15100000	12500000
F5	P12259	7720000	7470000	6970000	3870000	3980000	3860000	2450000	3580000	3910000	2200000	1910000	2440000
F7	P08709	10600000	10100000	9730000	1120000	1080000	1040000				513569	971449	968165
F8	P00451	328289	323348	279450	382745	222222	530442	345731	345541	466314	937578	1510000	337665
F9	P00740	119000000	119000000	109000000	2570000	2620000	2370000	2080000	1180000	1070000	1340000	1380000	1570000
FABP1	P07148	1150000	1140000	1310000
FABP5	Q01469	224686	317997	315139
FBLN1	P23142	2170000	1620000	1560000	11400000	11100000	12400000	2360000	2820000	2850000	2710000	3130000	2590000
FBLN5	Q9UBX5	1240000	674018	939649	851065	846500	812546			165440	626465	737645	486250
FBLN7	Q53RD9	947379	766191	654406
FBXO7	Q9Y3I1	500578	505071	413477		658310	825365
FCGBP	Q9Y6R7	3540000		4350000	7280000	7690000	8230000	29200000	25400000	27600000	17000000	13500000	20400000
FCGR3A	P08637	234547			1250000	1390000	1420000	776782	850159	935068	914088	919569	642014
FCN1	O00602							1350000	1290000	981473	1570000	1450000	1340000
FCN2	Q15485	816055	941912	810832	2780000	3080000	3320000	2360000	2580000	2460000	6690000	6440000	7830000
FCN3	O75636	4570000	4800000	4510000	13200000	13300000	13200000	10700000	8950000	10500000	20800000	19300000	28100000
FERMT3	Q86UX7	1840000	1840000	1830000	498219	595419		707351	869768	872858	681489	516279	526126
FETUB	Q9UGM5	2160000	1940000	1180000	396574	469013	378832	997004	725745	1070000	2110000	1780000	2080000
FGA	P02671	350000000	505000000	351000000	74900000	68900000	44700000	447000000	417000000	454000000	490000000	513000000	528000000
FGB	P02675	491000000	740000000	507000000	89500000	84500000	56100000	654000000	564000000	634000000	708000000	729000000	733000000
FGG	P02679	277000000	378000000	286000000	74500000	67100000	51600000	329000000	287000000	325000000	385000000	391000000	402000000
FGL1	Q08830	1570000	1650000	1590000	1060000	1110000	1090000	740576	475228	553687	933895	865140	984206
FGL2	Q14314	470251	383618	394400
FHL1	Q13642	492624	522311	405609									317405
FKBP4	Q02790	135520		227439
FKBPL	Q9UIM3	738355	939294	669333				675242		790623			660856
FLG	P20930	95112.2		161343		143753		121539	906536	1110000	765120
FLG2	Q5D862	290251	331559	605663		571570	435717	981476	1730000	403020
FLNA	P21333	87576.4	83938.8	172764	389725	346774	363809	310116	281766	374095	182772	263501	226507
FMOD	Q06828			245976
FN1	P02751	2240000	2250000	1660000	71100000	74400000	80900000	17100000	17900000	19200000	99800000	92800000	100000000
FOLH1	Q04609	796977	699519	476155						479815
FSCN1	Q16658	318448		624884
FSTL1	Q12841				511666
FTCD	O95954	1190000	1130000	1080000				562136	292313	456879	706571	616641	707339
GAL3ST4	Q96RP7	133050		135680
GALC	P54803										268209	330671	494874
GALE	Q14376		223964
GALK1	P51570	590432	584911	552760
GANAB	Q14697	840809	774289	716432	579385	756694		1230000	1060000	1220000	2260000	1710000	2020000
GAPDH	P04406	11600000	12400000	11200000	857022	1190000	786480	1180000	1540000	1110000	2530000	2000000	3150000
GBA1	P04062	611199	552393	545822
GC	P02774	12800000	17400000	11400000	4240000	4140000	3690000	8120000	9790000	9890000	14700000	16300000	18300000
GCA	P28676	652609	512456	579348						532862
GCLM	P48507	1440000	1470000	1550000			2730000
GDF15	Q99988	419367	723871	287816
GDF2	Q9UK05	1210000	1210000	1120000	1440000	1490000				1540000
GDF7	Q7Z4P5	174991	525560	436762
GGH	Q92820							557439	333894	380034	519200	327531
GGT1;GGT2P;GGT3P	A6NGU5;P19440;P36268		238803					885160	834946	883338			609135
GKN2	Q86XP6	269144	276500	319357
GLRX3	O76003	267541		230298
GLTPD2	A6NH11	1380000	1330000	1210000		1980000		1050000
GMPR	P36959	739690	795658	761852
GNAO1	P09471							450676	492928	534947
GNB1;GNB2;GNB4	P62873;P62879;Q9HAV0	318117	289451	342145
GNMT	Q14749	278086	262862	278959
GNPTG	Q9UJJ9	1010000	1070000	943738	373360			259583	185962	223186
GOLGA3	Q08378	4090000	4120000	4790000	3050000	2860000	3450000	2340000	2530000	1970000	1290000	1030000	2220000
GP1BA	P07359							623465	945673	754512	456604	594178	675160
GPC6	Q9Y625	268888	268259	366642
GPD1	P21695	599464	610215	599153
GPLD1	P80108	83200000	79000000	74700000	1360000	1290000	1180000	2870000	2810000	2750000	2920000	3050000	3290000
GPX3	P22352	12800000	12900000	11400000	3260000	3390000	3550000	806303	1010000	801381	4290000	4110000	4360000
GRHPR	Q9UBQ7	2540000	2240000	2150000
GSN	P06396	7960000	9520000	7840000	5960000	6590000	6440000	3260000	4160000	4210000	8070000	9120000	8890000
GSTO1	P78417	227715	220941	177198				130054		155156
GYG1	P46976	510945	587384	484274
H1-2;H1-3;H1-4	P10412;P16402;P16403	727286	1080000	1060000
H2AC12;H2AC14;H2AC17;H2AC19;H2AC20;H2AC25;H2AC6;H2AC7;H2AC8;H2AJ	P04908;P0C0S8;P20671;Q16777;Q6FI13;Q7L7L0;Q93077;Q96KK5;Q99878;Q9BTM1	1780000	1640000	1310000	1940000		920017		820513		2470000	1870000	2700000
H2BC10;H2BC12;H2BC12L;H2BC13;H2BC14;H2BC15;H2BC18;H2BC5;H2BC9	O60814;P57053;P58876;P62807;Q5QNW6;Q93079;Q99877;Q99879;Q99880	734659	991696	821960	1560000	119225	196291		567484		1360000	985946	1280000
H4C16	P62805	542616	551764	503357	886306	727312	486821	762783	945314	599474	1570000	1260000	1790000
HABP2	Q14520	9820000	19600000	11800000	3390000	3570000	3390000	703405	932256	835385	2010000	2420000	4490000
HAGH	Q16775	1150000	1110000	1200000
HBA2	P69905	4490000	2060000	1680000	940143	1040000	1120000	29600000	24300000	28700000	8080000	7730000	9240000
HBB	P68871	10500000	5850000	5000000	2230000	1730000	1790000	49600000	44000000	54200000	19800000	20700000	22400000
HBD	P02042	423554						1850000	1450000	2150000	817930	782716	810196
HGFAC	Q04756	599227	643226	661631	995657	753154	584202	1030000	1090000	1280000	1160000	988728	1120000
HLA-A	P04439	4660000	4350000	3820000				1620000	2130000	2090000	780106	771049	761725
HLA-B	P01889	504968	454089	360594				592099	691354	427576	361642	311718	329716
HLA-C	P10321	550005	380809	361606		383745			1160000	1130000	498373	705350	457792
HMCN1	Q96RW7	804918	848009			280762		780419	573379	703097
HMGCS2	P54868	474215	440000	395470
HNMT	P50135	496107	439598	514215
HNRNPA1	P09651
HNRNPA2B1	P22626
HNRNPC	P07910		352820
HNRNPH1	P31943
HNRNPK	P61978
HP	P00738	49000000	49800000	29400000	46800000	47600000	48500000	1070000000	965000000	1070000000	591000000	631000000	616000000
HPN	P05981	1130000	958958	1050000
HPR	P00739	30200000	29800000	26000000	11100000	12100000	11600000	23400000	19600000	21800000	38600000	32900000	45900000
HPX	P02790	168000000	179000000	151000000	14000000	14800000	13100000	111000000	97400000	121000000	148000000	133000000	153000000
HRG	P04196	4330000	5250000	3930000	26600000	27900000	28900000	4510000	6360000	7250000	12800000	13800000	12600000
HRNR	Q86YZ3	237548	353051	900199	626142	343488	700564	665232	814068	592167	390765	243821	312372
HSD11B1	P28845	309580	247669	353199
HSD17B10	Q99714
HSP90AA1	P07900	1430000	1380000	1480000	540254	503229	448036		486984		384429	437605	394877
HSP90AB1	P08238	1050000	981503	1050000
HSP90B1	P14625	4840000	4580000	4900000	11000000	593115	2050000	2840000	653496	1240000	3740000	561730	3540000
HSPA1A;HSPA1B	P0DMV8;P0DMV9	300917	234427	225767		659780	1290000	560766	561395	510794	627565	445779	691068
HSPA5	P11021	1100000	1090000	1050000	1330000	1290000	1310000	1000000	1040000	1030000	1040000	948668	991544
HSPA8	P11142	869377	670453	735422		1350000		644926	836384	917878	552195	506623	688908
HSPA9	P38646
HSPB1	P04792	237171	240830	247686				292674	641183
HSPD1	P10809	653917	506861	800841		911408	482866		650699	748767
HSPG2	P98160				574846	639567	584442	623894	517895	615254	303378	373003	167924
HTRA1	Q92743	1200000	1550000	1280000	179158	233973	209580	450826	420697	603671	545011	429735	679413
HYDIN	Q4G0P3	2030000	2480000	940440	164000000	166000000	181000000	7930000	7350000	7950000	15300000	18000000	19700000
HYI	Q5T013	2790000	2860000	2740000	700789	475575				2760000		3330000
HYOU1	Q9Y4L1	4210000	4340000	4520000	4260000	7930000	10200000	6280000	1980000	719704		775635	6150000
IDH1	O75874	697273	607776	620138					88762.4		198750	268958
IGF2	P01344	1000000	1070000	980355
IGF2R	P11717	711082	744086	666072	2120000	8270000	10700000	1440000	3820000	2870000	5670000	2300000	2720000
IGFALS	P35858	5990000	5860000	5310000	2000000	1970000	2090000	1590000	1760000	1860000	2350000	2540000	2170000
IGFBP2	P18065	915583	1840000	950717									401388
IGFBP3	P17936	908859	945232	902093	567638	590713	706274	660251	847471	822467	949224	973411	739322
IGFBP5	P24593		193213	102122		511942	304060
IGHA1	P01876	55700000	61400000	44400000	452000000	480000000	536000000	284000000	296000000	293000000	402000000	395000000	431000000
IGHA2	P01877	7780000	7910000	7080000	27500000	32100000	31900000	35900000	34300000	36600000	73600000	64300000	74300000
IGHD	P01880	1420000	1390000	1170000	8400000	8990000	9950000	5250000	6210000	6530000	6490000	6750000	6290000
IGHE	P01854				408208	403258	375535	464431			476506	471913	548120
IGHG1	P01857	98200000	150000000	74300000	3930000000	4180000000	4680000000	325000000	406000000	425000000	1140000000	1310000000	1160000000
IGHG2	P01859	110000000	151000000	103000000	2970000000	3080000000	3490000000	266000000	361000000	361000000	808000000	954000000	809000000
IGHG3	P01860	93800000	109000000	69000000	3400000000	3750000000	4270000000	424000000	474000000	529000000	1130000000	1170000000	958000000
IGHG4	P01861	11000000	16600000	7710000	505000000	560000000	594000000	61400000	66400000	73400000	153000000	175000000	138000000
IGHM	P01871	113000000	117000000	103000000	1020000000	1080000000	1140000000	1190000000	1080000000	1220000000	2860000000	2430000000	3280000000
IGHV1-18	A0A0C4DH31	1640000	1630000	1290000	10100000	10000000	11100000	3350000	3690000	3830000	6580000	6110000	7140000
IGHV1-2	P23083	916785	911331	921913	7070000	7620000	7860000	3270000	3330000	3620000	6220000	5530000	6550000
IGHV1-24	A0A0C4DH33				856485	1010000	1160000	304678	390120	339227	555196	613135	538041
IGHV1-3	A0A0C4DH29	1910000	1680000	2020000	7270000	8120000	8580000	2870000	2740000	2950000	5730000	4860000	6140000
IGHV1-45	A0A0A0MS14				5770000	7270000	5810000			562111	5330000	4240000	8000000
IGHV1-46	P01743	590003	689384	457110	8520000	8510000	8900000	2960000	3060000	3990000	5340000	5100000	5250000
IGHV1-69	P01742				4220000	4470000	4560000	1290000	1420000	1510000	2180000	2040000	2240000
IGHV2-26	A0A0B4J1V2	544067	564358		7710000	8320000	9330000	3260000	3210000	3480000	6180000	5960000	6630000
IGHV2-5	P01817		160524		5280000	5900000	6630000	2520000	2540000	2670000	6720000	6260000	6400000
IGHV2-70	P01814				490841	622030	578396	138836	288723	201435	240591	258795	218363
IGHV2-70D	A0A0C4DH43	3700000	4140000	3280000	20000000	25800000	8590000	30500000	4100000	5810000	6890000	5410000	7350000
IGHV3-13	P01766	322672	575254	244871	15100000	15400000	17300000	2180000	2200000	1930000	8190000	8360000	12500000
IGHV3-15	A0A0B4J1V0	7480000	8530000	5790000	148000000	153000000	174000000	55300000	56400000	68700000	132000000	119000000	136000000
IGHV3-20	A0A0C4DH32				2100000	1960000	2380000	685491	891088	880191	1810000	1510000	1680000
IGHV3-30;IGHV3-30-5	P01768;P0DP03	7450000	8930000	5730000	99100000	110000000	64000000	23600000	6430000	12800000	13300000	12100000	15900000
IGHV3-33	P01772				430799	416549	505475			51533.2	257336	458000	262821
IGHV3-35	A0A0C4DH35	1830000	2230000	1540000	61400000	65000000	75500000	6350000	5490000	5780000	16800000	14200000	20100000
IGHV3-38	A0A0C4DH36	1120000	1280000	938834	14300000	15800000	17600000	2820000	2950000	3460000	8590000	7810000	10800000
IGHV3-38-3	P0DTE1				2430000	2990000	3120000	856717	1010000	1370000	1820000	1740000	1350000
IGHV3-43	A0A0B4J1X8	361693	669431		19300000	21500000	23700000	2170000	2360000	1990000	6070000	7000000	8110000
IGHV3-43D;IGHV3-9	P01782;P0DP04	781431	1130000	780007	23500000	25700000	27900000	5360000	6090000	5760000	19900000	17900000	21400000
IGHV3-49	A0A0A0MS15	2120000	2170000	1300000	46100000	47600000	51600000	9810000	9060000	10100000	19800000	22600000	21800000
IGHV3-64	A0A075B6Q5	579315	524821	551385	10300000	10300000	12100000	2300000	2430000	2740000	5170000	4790000	5930000
IGHV3-64D	A0A0J9YX35	1430000	1410000	1060000	36600000	40200000	42700000	5960000	5420000	6040000	19400000	16900000	20800000
IGHV3-7	P01780	3660000	3920000	3050000	64800000	69800000	82200000	15500000	14700000	16900000	39900000	35000000	41200000
IGHV3-72	A0A0B4J1Y9				3420000	3770000	4400000	1970000	1870000	2280000	4730000	4450000	5100000
IGHV3-73	A0A0B4J1V6				4110000	3990000	4450000	1890000	2060000	1790000	5110000	4340000	5060000
IGHV3-74	A0A0B4J1X5	20900000	17700000	14000000	357000000	389000000	421000000	76400000	73500000	89800000	196000000	188000000	220000000
IGHV4-28	A0A0C4DH34	2070000	2230000	1200000	44900000	41600000	51700000	10600000	11300000	12900000	20700000	19600000	21200000
IGHV4-30-2	A0A087WSY4	561450	531359	411119	13500000	12400000	13500000	2750000	3260000	3450000	4950000	5120000	6560000
IGHV4-34	P06331	14600000	14300000	13200000	103000000	102000000	105000000	24300000	23300000	23900000	38500000	39600000	52500000
IGHV4-4	A0A075B6R2				3080000	3170000	3480000	1290000	1440000	1730000	2500000	1940000	2350000
IGHV5-10-1	A0A0J9YXX1	949398	1080000	544820	23500000	26000000	28600000	6440000	7470000	6510000	11700000	13700000	11800000
IGHV5-51	A0A0C4DH38	835326	1010000	504428	22500000	25800000	27000000	7440000	7110000	7670000	15800000	15800000	17600000
IGHV6-1	A0A0B4J1U7	2470000	2260000	1520000	52800000	50900000	51300000	16600000	17100000	16800000	36300000	33300000	37400000
IGHV7-4-1	A0A0J9YVY3		2520000		5400000	5720000	5780000	2130000	1350000	2530000	6130000	5890000	8470000
IGKC	P01834	56200000	46700000	28200000	1190000000	1240000000	1340000000	225000000	272000000	268000000	559000000	618000000	596000000
IGKV1-12;IGKV1D-12	A0A0C4DH73;P01611				769144	931038	1050000	932860	791771	987959	1160000	916371	882526
IGKV1-16	P04430				1700000	2220000	2550000	1840000	1680000	2000000	2310000	2300000	1930000
IGKV1-17	P01599	1310000			4890000	4870000	5710000	4410000	4400000	4930000	4760000	5150000	5920000
IGKV1-27	A0A075B6S5				2470000	2930000	3280000	2290000	2240000	2940000	3120000	3040000	3030000
IGKV1-33;IGKV1D-33	P01593;P01594	604688	212814		10300000	10200000	13300000	2920000	3430000	3090000	6370000	6400000	5450000
IGKV1-39;IGKV1D-39	P01597;P04432	879109			11000000	13700000	14700000	6490000	6360000	8130000	14700000	15200000	13000000
IGKV1-5	P01602	2060000	1770000	1020000	26200000	33100000	38900000	14700000	16600000	17600000	28600000	29000000	29200000
IGKV1-8	A0A0C4DH67	702074	638034	349630	7040000	8620000	8960000	4250000	4350000	4920000	8620000	8430000	8670000
IGKV1D-8	A0A087WSZ0					706367	598305				615889	662195	665154
IGKV2-24;IGKV2D-24	A0A075B6R9;A0A0C4DH68	1290000	1070000	669432	10700000	11900000	13300000	9330000	8320000	8930000	12900000	12700000	13500000
IGKV2-28;IGKV2D-28	A0A075B6P5;P01615	545876			7940000	8390000	8630000	3250000	3660000	3650000	6460000	5570000	6700000
IGKV2-29	A2NJV5	5300000	3820000	3110000	69700000	69000000	81000000	39300000	41900000	38800000	50500000	53100000	56200000
IGKV2-30;IGKV2D-30	A0A075B6S6;P06310	1020000	950557	835207	1470000	2030000	3760000	1430000	1600000	1610000	1990000	1740000	2100000
IGKV2-40;IGKV2D-40	A0A087WW87;P01614				977792	886746	1040000	157277	269071	257711	439733	617989	474231
IGKV2D-29	A0A075B6S2	1050000	481197	669118	1930000	2350000	2170000	2150000	2240000	2220000	2050000	1850000	2810000
IGKV3-11	P04433	3250000	1600000	854344	26100000	30300000	32900000	12900000	12800000	13100000	21700000	18600000	21200000
IGKV3-20	P01619	13100000	7710000	4590000	82100000	94500000	90200000	61800000	61200000	64200000	83600000	75900000	79100000
IGKV3-7	A0A075B6H7	7060000	4480000	2820000	151000000	175000000	185000000	37700000	46000000	44300000	82000000	96400000	75700000
IGKV3D-15	A0A087WSY6	805644	714934	324549	10400000	12000000	14100000	4550000	5150000	5020000	8810000	10400000	9870000
IGKV3D-20	A0A0C4DH25	628047			8500000	8050000	9440000	4010000	3700000	3620000	5040000	5810000	6140000
IGKV4-1	P06312	4390000	3570000	2760000	55700000	58900000	85400000	23900000	21000000	20400000	52500000	45800000	49200000
IGKV6-21	A0A0C4DH24				1560000	1600000	1920000	976407	1240000	1180000	2180000	2290000	2400000
IGKV6D-21	A0A0A0MT36	362829	314796	229796	3290000	3130000	2880000	2290000	2790000	2530000	3500000	3200000	3180000
IGLC3	P0DOY3	23700000	15000000	9820000	196000000	197000000	216000000	102000000	118000000	105000000	148000000	141000000	125000000
IGLL1	P15814	3810000	4000000		36100000	34000000	39000000	15600000	15200000	14800000	24300000	23500000	20200000
IGLL5	B9A064	39500000	30500000	22700000	486000000	523000000	537000000	198000000	255000000	208000000	327000000	325000000	278000000
IGLV1-47	P01700	1460000	883721	733322	7320000	8630000	10500000	3850000	4810000	4480000	6640000	6630000	6810000
IGLV1-51	P01701	1770000	984963	1030000	8650000	8940000	10700000	3790000	4360000	4600000	6950000	6160000	7160000
IGLV2-11	P01706	1890000	1910000	1730000	8160000	8390000	9960000	7890000	8710000	7950000	10600000	9550000	8850000
IGLV2-18	A0A075B6J9		313925		2610000	2880000	3220000	2990000	3350000	3210000	4600000	4530000	4960000
IGLV2-23	P01705	734689	544274	581113	2420000	2620000	3260000	2120000	1920000	2120000	7160000	7930000	8930000
IGLV2-8	P01709	1390000	871734	678994	5990000	6380000	7600000	6740000	5300000	7260000	6960000	8270000	7390000
IGLV3-1	P01715	579496	551971	509754	894920	1440000	1470000		460630		1020000	875721	1020000
IGLV3-10	A0A075B6K4	271137			3690000	3770000	3690000	1660000	1710000	1610000	3130000	2860000	2050000
IGLV3-19	P01714	1250000	742526	338930	14500000	15500000	15900000	6080000	5220000	6080000	10100000	10600000	6490000
IGLV3-21	P80748	511120			3610000	4530000	4180000	1810000	1940000	2080000	2440000	2460000	2420000
IGLV3-25	P01717	1590000	724678	1030000	22100000	22900000	28900000	7040000	8970000	8260000	11700000	12400000	9870000
IGLV3-27	P01718				578977	917214	1070000				696791	637176	297572
IGLV3-9	A0A075B6K5	544150	726149	617162	4060000	4470000	4880000	2090000	2380000	2060000	2740000	2690000	2500000
IGLV4-69	A0A075B6H9				737828	826284	796301	787465	820942	851568	1480000	1300000	1320000
IGLV5-45	A0A087WSX0	390730			2890000	3170000	3530000	3300000	3540000	3560000	4200000	4360000	4550000
IGLV6-57	P01721	467886			8260000	9320000	11200000	3540000	4080000	3890000	6650000	6650000	5740000
IGLV7-43	P04211						1080000	724215	764696	814064	1050000	860828	886029
IGLV7-46	A0A075B6I9	2380000	2350000	1540000	7820000	8070000	9530000	7970000	8270000	8240000	7400000	8220000	7030000
IGLV8-61	A0A075B6I0	2660000	2200000	2040000	6580000	6750000	7480000	5120000	5450000	6080000	7340000	6590000	7980000
IGLV9-49	A0A0B4J1Y8	480466	253489	160188	1970000	2160000	2050000	2410000	2180000	2530000	1790000	2260000	2430000
IHH	Q14623	461478	340006	314194
IL1RAP	Q9NPH3	361461	295186	335847							328655	207710	231864
ILK	Q13418	341280	315874	353977
INF2	Q27J81	219352		246375	960704	1080000	902079				375386
INHBB	P09529	275020	211360	261800
INHBC	P55103	16200000	15000000	14100000	306572	214730	181562	597997	484987	510330	652740	550346	783572
INHBE	P58166	1280000	1110000	1080000	109046				315434	357068	963050	757146	574769
ITGA2	P17301	279864	283462	229321
ITGA2B	P08514							761211	861941	1010000	1540000	1120000	1770000
ITGA6	P23229				2210000	2160000	2700000	2990000	2920000	2730000	4780000	4750000	7660000
ITGAM	P11215	256870	256603	277495
ITGB1	P05556	921891	836411	821298				484849	456118	661410	435171	382569	357081
ITGB2	P05107	303744	372420	277609		480377
ITGB3	P05106	271403						656993	994980	1020000	790433	534923	953450
ITGB6	P18564
ITIH1	P19827	14100000	13900000	11600000	49500000	50100000	56700000	20200000	19900000	21100000	17800000	21200000	20100000
ITIH2	P19823	30700000	31200000	26500000	86900000	87500000	96100000	27800000	29200000	30900000	25500000	31700000	27800000
ITIH3	Q06033	14000000	13700000	13200000	4500000	4430000	4380000	5620000	6290000	6460000	4810000	4870000	4690000
ITIH4	Q14624	42700000	49400000	35700000	20600000	22500000	23200000	11900000	13900000	15600000	22500000	26800000	27500000
ITLN1	Q8WWA0	3580000	3350000	3250000	322386	670381	598487			228347	1210000	969532	898328
ITM2B	Q9Y287	457186	393102	293728	464061				612462	679046	80493.6	622931	234715
JCHAIN	P01591	3950000	2810000	2560000	43800000	50500000	59000000	20000000	23600000	19800000	76000000	75600000	75300000
JUP	P14923	241627	205020	578694	121066	199929	463837	454090	1340000	373818	137437	191022	250343
KCNG1	Q9UIX4	2910000	3840000	2690000	432546	445802	376597	4460000	2270000	3370000	1620000	1520000	2570000
KHK	P50053	499287	410071	498794
KLKB1	P03952	3470000	4290000	3460000	4410000	4810000	5230000	2200000	3190000	3260000	4280000	4610000	5100000
KNDC1	Q76NI1	523289	538715	471286
KNG1	P01042	115000000	120000000	104000000	18000000	19900000	20000000	12200000	17800000	19400000	23400000	25400000	29200000
KPNB1	Q14974	254936	281394	328036				526241
KRT1	P04264	20500000	33400000	63200000	21700000	20000000	34200000	33800000	53200000	22000000	17700000	14600000	26900000
KRT10	P13645	12000000	17500000	26100000	8450000	17500000	13200000	17900000	36100000	11300000	9510000	7120000	15400000
KRT13	P13646			1550000					2040000		540505
KRT14	P02533	1980000	2480000	3490000	1780000	1690000	3420000	2450000	3830000	1860000	1700000	958032	2570000
KRT16	P08779	797769	819217	835424	773030		2020000		840073				996685
KRT17	Q04695	325450		511935			681435		563604				544681
KRT18	P05783	332724	248997		2530000	3030000	2830000	2100000	2470000	1920000	2760000	3120000	2500000
KRT2	P35908	7500000	10600000	16400000	4910000	9970000	6620000	11000000	14500000	6900000	5780000	4530000	9890000
KRT4	P19013								443543
KRT5	P13647	2530000	2790000	4450000	2040000	2290000	3040000	3540000	5350000	2030000	1780000	1660000	2750000
KRT6A	P02538	1470000	1080000	1350000	1000000	478354	2830000	1010000	1790000	928516	879442	550440	1750000
KRT6B	P04259	934843									616048		669866
KRT76	Q01546
KRT77	Q7Z794			114616				191178	173600
KRT78	Q8N1N4	245488	265449	463020				560448	775318	311873	610729		180314
KRT8	P05787
KRT80	Q6KB66	2420000	5190000	7270000					11700000
KRT9	P35527	5790000	9100000	21000000	8120000	3290000	11000000	9250000	5990000	6610000	5180000	4900000	7610000
KRTDAP	P60985	539588	418345	527601		612793	613384						356171
LAMA2	P24043				485418	443127	496073	806447	681990	666564	162412		90887.3
LAMB1	P07942	186783	245824	209458	1480000			1020000	974348	887387
LAMC1	P11047					105585	69141.3	785261	709163	724496		107667	156716
LBP	P18428	415000000	554000000	422000000	7220000	6970000	7740000	6710000	4480000	5080000	6910000	6800000	11800000
LCA5L	O95447	135355	118276	118032
LCAT	P04180	3840000	3310000	3560000	916697	702008	969361	1710000	1620000	1930000	1230000	1240000	1020000
LCP1	P13796	1930000	1970000	1740000	842819	569186	606394	222727	445278	753367			588008
LDHA	P00338	751450	823903	773749	417007	379244	435470	348631	485979	331954	570391	623504	626870
LDHB	P07195	387198	379309	401127	236523	209132	207218	374166	370939	267969	585823	674345	665332
LECT2	O14960	1690000	1380000	897281
LEP	P41159	2380000	2030000	2070000
LFNG	Q8NES3	378184	320904	403750				374886
LGALS1	P09382	765017	674867	690546
LGALS3BP	Q08380	910790	718738	705368	16500000	17000000	17700000	60300000	55500000	54100000	64600000	54500000	70700000
LGALS7B	P47929								1600000
LIPA	P38571	1140000	929144	1020000
LIPC	P11150	1450000	1230000	1190000
LIPG	Q9Y5X9	1130000	1040000	1030000					1380000		5300000
LMAN1	P49257	421398	501857	427840
LMAN2	Q12907	424332	474624	468538
LMNA	P02545			174892					1070000				562399
LPA	P08519	9100000	6220000	6640000	29800000	29400000	31300000	51800000	62200000	65600000	13000000	11600000	14600000
LPL	P06858	802763	835222	768343
LRG1	P02750	1290000						7290000	5690000	7520000	3300000	2510000	2960000
LRP1	Q07954	272139	150872	135704	666975	757604	726749	830698	683238	925324	535699	480791	520481
LTBP1	Q14766	919447	1140000	1010000				1180000	1290000	1610000	1070000	795583	764572
LUM	P51884	59600000	52200000	48900000	148253	650368	91758	1380000	1310000	1240000	697902	698140	787089
LY96	Q9Y6Y9	1090000		1090000
LYVE1	Q9Y5Y7	84427.8						492719	598643	524764	73354.4	191660	131045
LYZ	P61626	462826	660675	407539	1740000	524008	620423		449270		1120000	1130000	1160000
MADCAM1	Q13477	971705	698522	730586				1540000
MAN1A1	P33908	809847	910618	870455	298605	185246	493513		467216		604575	1100000	965509
MAN2A1	Q16706	186554	231712	237158	480059	663134	463073		451568			507048	548285
MAPK1	P28482	451510	404451	388265
MAPK14	Q16539	215550	165534	192899
MARCO	Q9UEW3	1120000	1260000	1090000				2100000	2160000	2330000
MASP1	P48740	2750000	2540000	2590000	2070000	2280000	2310000	3210000	3300000	3440000	3510000	3170000	3720000
MASP2	O00187	16500000	18400000	14400000	2660000	2950000	3560000	2980000	2850000	2780000	3740000	3590000	5050000
MAT1A	Q00266	563144	422409	551247	306846
MAT2A	P31153
MBL2	P11226	426602	190489	220791	1560000	1710000	2060000	3780000	3550000	3310000	1100000	1150000	1000000
MDH2	P40926
MENT	Q9BUN1	422485	308972	407280
MFAP4	P55083	315774
MFAP5	Q13361	207665	192398	235224
MGAT1	P26572	1910000	2280000	2080000		212916		4270000	2360000	2740000	924437	2630000	794373
MGAT5	Q09328	989764	848816	999610
MGLL	Q99685	507668	540668	478193
MGP	P08493	1830000	2660000	2140000									894064
MICU2	Q8IYU8	5030000	1060000	682338	917618	1200000		27800000	2260000	4690000	1200000	1040000	1170000
MINPP1	Q9UNW1	2490000	2230000	2460000		2070000	1910000		1490000	1530000	1590000		173209
MMP19	Q99542	1570000	1640000	1630000						475788			290844
MMP2	P08253	2820000	2680000	2740000	417395	574615	642229			3390000	1180000	1000000
MMP3	P08254	1010000	1040000	1040000
MMP8	P22894	22702.9
MMP9	P14780	347915	305584	394748
MMRN1	Q13201	420942	530082	523617	483694			923005	820339	846499	810502	708457	968664
MMRN2	Q9H8L6	2750000	2920000	2920000				414081	468811	518240	358136		557955
MORC4	Q8TE76					922463		914659	515794	762906	2240000	1740000	2080000
MPO	P05164	1460000	1380000	1380000	1500000						478314		264731
MPP1	Q00013	358676	335256	262708
MSN	P26038				257521	163311	238373	571607	815377	815792	397169	314276	360652
MST1	P26927	605997	601696	475909	4010000	4450000	4900000	460689	573926	553513	1650000	1760000	1420000
MTHFD1	P11586	1220000	1130000	1250000							736219	1220000	1250000
MTSS2	Q765P7	1620000	1640000	1680000	2010000		1990000	2780000	3110000	3520000
MYH7B	A7E2Y1	177919		206974
MYH9	P35579	301870				125351		589941	667080	652982	448500		316272
MYLK2;MYLK3;MYLK4	Q32MK0;Q86YV6;Q9H1R3				102381
NAMPT	P43490	871538	800454	952926					1460000
NAPA	P54920	1610000	1570000	1590000
NCL	P19338	320967	498096	372658
NID1	P14543	496594	236168	411635	1530000	1480000	2240000	1280000	1300000	1290000	1030000	1090000	1130000
NIF3L1	Q9GZT8	796010	721616	741313			1760000
NNMT	P40261	1630000	1420000	1360000
NOM1	Q5C9Z4		426071	208467				328398	216700		862620	776766	369436
NOMO1;NOMO2;NOMO3	P69849;Q15155;Q5JPE7	79113.4	99537.1	89817.4
NOTCH3	Q9UM47	177556	145114	191685	315851			209132	184331
NOTUM	Q6P988	289631	302228	332653
NPEPPS	P55786	390520	303428	376206					281470
NPL	Q9BXD5	234294	223130	244823
NPM1	P06748	4560000		4700000
NPNT	Q6UXI9	5420000	5440000	5250000				9450000	7410000	8560000
NRP2	O60462	297378	243270	227789
NSF	P46459	288537	257477	280473
NUCB1	Q02818			141611
NUP188	Q5SRE5	536422	430742	342013	15900000	15300000	18800000	1180000	1670000	1180000	2050000	3000000	3040000
OAF	Q86UD1	7480000	7510000	6770000	261273		2890000	331688	408395	335488	377315	327810	426517
OIT3	Q8WWZ8	2010000	1980000	1770000				904325	819375	812690	802776	639277	753171
OLFM1	Q99784	613430	502595	520681	766441	984191	707715	542040	587362	559817	650571	676691
OLFM2	O95897	837572	661453	740582
OLFM4	Q6UX06							1480000	1120000	1340000	932781	662291	692211
OPTN	Q96CV9	484803		412871
ORM1	P02763	1540000	3460000	730870	2330000	1970000	1320000	3740000	7450000	4630000	12400000	15200000	15300000
ORM2	P19652	7490000	6980000	6690000	2680000	2390000	2300000	4040000	5990000	4170000	9290000	9890000	10200000
OXSR1	O95747	273294	211626	259090
P4HB	P07237	190513	149910	195147	114027	99478.5		243832	224081	191217	151763	86729.2	79675.9
PARVB	Q9HBI1	403747	331988	377538		158003
PBLD	P30039	306673	357412	246248
PCBP1	Q15365	492784	449135	556501
PCDH1	Q08174	589004	568421	651045
PCDH12	Q9NPG4	361334	495375	421019				52733.2	74385.9				32236.3
PCDH18	Q9HCL0	111188	144358	138967
PCOLCE	Q15113	4130000	4260000	3890000	1250000	1210000	1410000						1480000
PCOLCE2	Q9UKZ9	537517	497237	422256
PCSK6	P29122	989552	867907	937678				276657	241232	287538	1020000	885761	731365
PCSK9	Q8NBP7	1560000	1540000	1500000	1830000	1750000	1790000	1450000	882358	1330000
PCYOX1	Q9UHG3	7310000	7080000	6740000	2060000	1910000	1900000	4470000	4050000	4560000	421834	527246	652504
PDCD6	O75340	3740000	3640000	3290000		8800000	10000000	4080000	5460000	5080000	652590	6180000
PDGFC	Q9NRA1	401016	422139	541110
PDIA6	Q15084	904844	836570	816183						574967
PDXP	Q96GD0	258104	207073	248806
PEPD	P12955							455096	357476	369895	504208	476259	591218
PF4	P02776	9180000	9530000	7430000		814849		1210000	1050000	1220000	675484	554037	978227
PF4V1	P10720	249077	184201	254721
PFKL	P17858										559386	495631	563045
PGK1	P00558
PGLYRP2	Q96PD5	4620000	4860000	3600000	1020000	1060000	893052	5850000	4700000	5550000	4060000	3590000	4280000
PGM1	P36871	611985	605334	595054				2890000	4630000	3480000		494992
PHB1	P35232
PHGDH	O43175	266812	257718	204963
PI16	Q6UXB8							643072	610051	541106	374095	436498	473539
PIGR	P01833	538591	394894	497914	3710000	3790000	4180000	3780000	3670000	4020000	9960000	8510000	12400000
PITPNA	Q00169	112341	87805.8	126046
PITPNB	P48739	622985	606880	652038
PKDCC	Q504Y2	574385	538869	575862	471209
PKLR	P30613	449383	466865	456329									54595.8
PKM	P14618	1910000	1630000	1760000	1840000	1590000			1620000	1340000	2180000	1780000	1960000
PLA1A	Q53H76	592466	696760	581884								1320000
PLA2G12B	Q9BX93	690796	645820	679025
PLA2G2A	P14555	343513		325664
PLA2G7	Q13093	1390000	1380000	1350000	711389	713945	594923	1480000	1330000	1630000			186093
PLAT	P00750	1560000	1190000	1440000				830476	656814	590335
PLG	P00747	18500000	22000000	20700000	126000000	124000000	135000000	5560000	6750000	7040000	34500000	39000000	29800000
PLIN1	O60240	196433	205471	207226
PLIN3	O60664	1280000	1100000	1070000
PLIN4	Q96Q06	543927	573278	419663
PLS3	P13797	410809	319551	356311
PLTP	P55058	50200000	54600000	47000000	1400000	1720000	1300000	3300000	3220000	3380000	2750000	2430000	1880000
PLXDC2	Q6UX71	593991	524796	462853		500327		731568	502564	562492	440518	497333	307479
PLXNB1	O43157	1140000	1050000	1110000				1130000	1140000	887788			976959
PLXNB2	O15031	575828	592103	524336
PMVK	Q15126	284174	259716	319287
PODXL	O00592	215510	204084	183566				517149	565591	500218
POF1B	Q8WVV4				2080000	1990000	2140000		894834
POLE2	P56282	3630000	3730000	2690000
PON1	P27169	456000000	659000000	509000000	11900000	12300000	12500000	15300000	14900000	15600000	10400000	11100000	11900000
PON3	Q15166	71900000	70000000	69100000	4470000	2950000		7330000	6100000	5580000	1300000	2950000	5130000
POSTN	Q15063	530941	897243	695910	483835	700819		655167	657964	708248	1190000
PPBP	P02775	376108	465186	280041
PPIB	P23284	66282.5	195555	152675								37118.1
PPIP5K2	O43314	537176	464367	456533
PPP2CA;PPP2CB	P62714;P67775	278268	322369	380866
PPP2R1A	P30153	1860000	1610000	1650000			4390000
PPP3CA	Q08209	499880	503547
PRB4	P10163				461167
PRDX1	Q06830	146598	124334	286105	285735	202087	244521		486485	206125	244911	190984	217991
PRDX2	P32119	1030000	916574	933581	552308	745718	759682	1100000	1130000	905781	1020000	1040000	1050000
PRDX5	P30044	125445	215138	164804
PRDX6	P30041	4080000	4130000	3940000		201703	12000000	297621	463635		591891	419632	667792
PRG4	Q92954	1970000	2120000	1640000			8530000	3950000	5650000	7190000	771266	2920000
PRH2	P02810		34635.5	62992.3		66919.8		87667.8
PRL	P01236	505689	553042	381131
PROC	P04070	690026	729849	556047	268309	270859	238816	244740	363624	425931	527726	544936	515834
PROCR	Q9UNN8	334329	262465	293613				266060	175714	219274		132689	63509.3
PROS1	P07225	10100000	9280000	8580000	28000000	29300000	31800000	29300000	33700000	33300000	34100000	31600000	38900000
PROZ	P22891	82563	125698		510486	362814	481887	280169	362853	299807	337566	254106	211417
PRPS1	P60891	1660000	1420000	1390000							2240000		1730000
PRSS1	P07477	8980000	10800000	11400000	12600000	11400000	14800000	9670000	9910000	7060000	5470000	5580000	9950000
PRSS2	P07478		2660000	681374				767507	329308
PRSS3	P35030	3420000	3530000	4000000	1920000	1980000	2360000	2250000	2190000	1550000	949846	768891	1380000
PRTN3	P24158	138553		109993	902173
PSAP	P07602
PSMA1	P25786	215912	191659	166546		136539		199525	299694	224957	669247	701836	782905
PSMA2	P25787
PSMA4	P25789								335956	230693	816694	732245	873190
PSMA5	P28066	152826	176010		225098	289989	256145	305415	321433		464183	467162	629396
PSMA6	P60900				186637				172900		449404	499304	406534
PSMA7	O14818							251820	352469	276652	1200000	905501	1060000
PSMB2	P49721								376074	573124	780214	789638	899023
PSMC5	P62195	96858.1	82111	61047.1
PSMD10	O75832	204962	224639	162152				85305.3					60906.5
PSMD5	Q16401	368039	344285	412589						1040000
PSME1	Q06323	262184	196385	211059
PSME2	Q9UL46	772171	779186	731997					259134
PSMF1	Q92530	466466	519760	511656								1080000
PTBP1	P26599	219224	219319	174040
PTGDS	P41222	609575	553578	451100				664171	801084	702875	1420000	973992
PTN	P21246	138341	199911	236910
PTP4A1	Q93096	421520
PTPRF	P10586	735344	644397	679848	476163	615772	266178	295761	149212				136781
PTX3	P26022	106614			320344	224764	212860	790906	683367	688919	226778	215581	201149
PZP	P20742	2170000	2380000	2060000	6360000	6090000	6460000	9470000	9410000	10400000	16600000	17000000	18800000
QSOX1	O00391	2550000	1960000	2180000	1480000	1370000	1400000	747778	753712	930147	824294	893988	825932
RAB10	P61026	201756	186161	232902				179389	286124	221108	171746	90348.1	146048
RAB1A	P62820		452995	390531
RAB6A;RAB6B	P20340;Q9NRW1	617679	557852	507540
RAB8A	P61006	527724	367378	411083					212325
RAB8B	Q92930	201351	140915	132927
RAC1	P63000	1770000	1680000	1420000					810354	705736
RALA;RALB	P11233;P11234	111171	111057	80327.2				64279.6	162477	163536	72680.2
RAN	P62826	4030000	3800000	3600000				772531	800548	705238	925174	881237	912714
RAP1B	P61224	1560000	1520000	1570000		755849		943516	1280000	1590000	1290000	1120000	1080000
RARRES2	Q99969	4360000	4080000	4000000	839835	1340000	1280000				1280000	886299	710031
RBP4	P02753	1980000	3850000	2310000	4650000	4830000	4830000	1130000	1540000	1350000	6270000	6870000	6790000
RELN	P78509	269950	156730	284778	412525	471336	561191	2660000	2100000	2410000	992804	976574	1200000
RHOA	P61586	806178	647697	749283						288282
RIC8A	Q9NPQ8	284766	229209	292173
RNASE4	P34096	248252	265822	253475	434766	452694	542448				636008	581072	480593
RNH1	P13489	200893	153210	258361
RNPEP	Q9H4A4	512582	417616	549823				423211
RPL11	P62913	215126	291787	220538				476408	498328	483539	630134	605683	594460
RPL12	P30050			203371
RPL3	P39023
RPL8	P62917
RPLP0	P05388	450607	439499	411499			985447
RPLP2	P05387		563309	584440
RPN2	P04844
RPS10	P46783	71532.4	106795	126213
RPS2	P15880							533458		358092
RPS27A;UBA52;UBB;UBC	P0CG47;P0CG48;P62979;P62987	1080000	1410000	1280000	660243	942910	477466	2290000	2440000	2180000	2530000	1770000	2980000
RPS7	P62081	1310000	1090000	952342	484879	680724	680663	2130000	919430	1770000	698767		979473
RUNDC3B	Q96NL0	260252	173044	103681
S100A7	P31151		253237	108777		84299.1	268127		2240000
S100A8	P05109	450528	527290	555129	637153	731783	840932	817339	3300000	554461	310518	404122	599204
S100A9	P06702	649140	699002	792727		558595		610488	4790000	684725	470732	401972	734566
SAA1	P0DJI8	61400000	55300000	56300000	2720000	3040000	1850000	3330000	3780000	3810000	1790000	2010000	1880000
SAA2	P0DJI9	45900000	41800000	41600000	821308	2140000		1450000	1410000	1490000	1410000	902997	1510000
SAA4	P35542	99100000	99000000	75100000	1440000	3440000	1680000	58900000	49300000	62100000	4370000	3860000	4770000
SAE1	Q9UBE0	6510000	6400000	6270000									372384
SAR1A	Q9NR31	722074	700100	675627									79532.3
SBSN	Q6UWP8	340409	334317	312114	285499	308020	251261	158218	175139	139446	151461	162633	163442
SDCCAG8	Q86SQ7	308649	442632	356083	833460	753286	775918	369207	371602	359580	480819	601779	484492
SELENOP	P49908	9610000	10100000	9050000	2360000	2440000	2480000	2080000	2450000	2150000	2370000	2580000	2650000
SELL	P14151	1620000	1390000	1350000	454629	394019	421110	1440000	1220000	1540000	326546	291178	384377
SELP	P16109	281677	243430	241275				247801	208953	257724
SEMA3B	Q13214	254668	298461	219868
SERPINA1	P01009	34500000	28900000	23400000	7790000	7540000	6440000	27300000	36300000	38300000	27400000	32300000	31100000
SERPINA10	Q9UK55	52200000	49500000	48100000	1020000	1120000	906754	1490000	964203	1040000	975534	1050000	1130000
SERPINA11	Q86U17	1260000	1150000	1070000	176268			359396	233423	306469	393140	214843	158756
SERPINA3	P01011	18500000	20700000	16200000	6390000	6920000	5640000	14800000	18400000	17900000	21800000	23400000	26700000
SERPINA4	P29622	26100000	25700000	24700000	4240000	4330000	4170000	1270000	1420000	1370000	2550000	2780000	2570000
SERPINA5	P05154	1050000	1120000	905602	2030000	2310000	2210000		876267	726541	1090000	1160000	1160000
SERPINA6	P08185	1280000	1160000	790254	425618	412839		1920000	2380000	2380000	2570000	2310000	2780000
SERPINA7	P05543	1910000	1740000	1560000	365541	244449	266856	2700000	2460000	2670000	2470000	2200000	2700000
SERPINB12	Q96P63	287281	464189	483570			540198	583852	354060
SERPINC1	P01008	21100000	20800000	17400000	4400000	4490000	4160000	5670000	8440000	7380000	12700000	13800000	15000000
SERPIND1	P05546	6210000	5310000	4440000	2330000	2210000	2130000	3790000	4040000	4230000	4910000	5290000	5320000
SERPINF1	P36955	3840000	3710000	3270000	2540000	2720000	2790000	1300000	1270000	1090000	2410000	2500000	2190000
SERPINF2	P08697	9520000	9810000	7390000	3260000	3760000	3450000	6940000	7740000	7890000	8010000	8500000	7810000
SERPING1	P05155	28600000	28200000	25100000	6360000	6610000	6720000	30200000	32200000	33900000	14400000	14100000	16600000
SEZ6L2	Q6UXD5				951555	1010000	973982	530349	660988	528640	398837	589117
SFN	P31947
SFTPB	P07988	623607	639712	519897
SHBG	P04278	9170000	9250000	8020000	485636	642369	494502	1500000	1220000	1590000	1240000	1250000	1030000
SIL1	Q9H173	360038	426061	364039						699517
SLC25A5	P05141	228665
SLC25A6	P12236
SLC2A1	P11166							613010	858178	904313	895107	746845	1080000
SLC4A1	P02730	138443	85609.2	76051.5	212650	165027	165165	376549	1010000	966614	710004	613370	875924
SMPD1	P17405	945543	809374	887931							1260000	1070000
SNCA	P37840	6670000	6980000	6730000		1240000		638674			937539	445620	938052
SNCG	O76070	714778	660021	555371
SNED1	Q8TER0	734942	573789	660309	314279			469391		455498
SORD	Q00796	756460	649360	666903			320329					546574
SPARC	P09486	2300000	2380000	2430000			12700000				6030000
SPARCL1	Q14515	4630000	4070000	4190000		778457	661150	757094	999274	832762			3040000
SPON1	Q9HCB6	310627	282193	569337
SPON2	Q9BUD6	626179	615857	523065
SPP2	Q13103	10300000	14100000	10000000	1700000	1780000	1620000	1330000	1320000	1480000	2800000	2730000	4170000
SPTA1	P02549		439849	677698
SRGN	P10124							4350000	3190000	2780000
SRPX	P78539	441200		456832
SSB	P05455	1310000	1220000	1220000
SSC5D	A1L4H1				608000			4220000	2470000	2880000
ST13	P50502	1440000	1550000	1600000				380541	423383	400515	427288	439828
ST3GAL1	Q11201	293339	282766	220700
ST3GAL6	Q9Y274	664074	612002	568357	9130000	10400000	11700000	4320000	4450000	4800000	7980000	7170000	7220000
ST6GAL1	P15907	2410000	2990000	2400000							251461	341661	649360
ST6GALNAC1	Q9NSC7	477539	380367	443058					1010000	112809
ST8SIA4	Q92187	211076	258028	101504
STC2	O76061
STIP1	P31948	578084	532092	561734
SUGP2	Q8IX01	3850000	3710000	2810000
SULT1A1;SULT1A2	P50225;P50226	233651	193958
SULT2A1	Q06520	1590000	1590000	1850000					1800000			2540000
SVEP1	Q4LDE5	501618	600429	512936	401056	777182	636470	3510000	2920000	3390000	1230000	1090000	1410000
TCN2	P20062	430227	541099
TCP1	P17987	463178	348199	411635							558651		611325
TF	P02787	12900000	32700000	6800000	37000000	37500000	33500000	51200000	75000000	76000000	137000000	159000000	145000000
TFPI	P10646	680520	617673	771682	1320000	581152		435972		631071
TFRC	P02786	1460000	1450000	1470000	663295	788268	766771	2280000	2880000	3450000	3930000	3620000	4600000
TG	P01266		136755			326686		900205	945435	968723	526302	830372	468631
TGFBI	Q15582	2760000	3780000	3050000	2270000	2190000	2200000	1200000	1350000	1470000	1880000	1840000	2240000
THBS1	P07996	2700000	2480000	2400000	4650000	4600000	4460000	3850000	5000000	6150000	2880000	2810000	3620000
THBS4	P35443	880878	1010000	846325	1650000	1800000	1690000	2730000	2590000	2950000	1190000	1170000	1240000
TIMP2	P16035	798875	883900	709957			714717				652826
TIMP3	P35625	591110	622667	557615
TKT	P29401	593593	455247	501749					143925
TLN1	Q9Y490	2740000	2410000	2650000	874971	840245	1040000	562178	720500	885800	737114	671985	698719
TNC	P24821	1270000	564305	1080000	3630000	3900000	4040000	20000000	15100000	18600000	2270000	3020000	3020000
TNXB	P22105		307583	270034	1030000	1010000	962464	720889	514452	636497	604104	294093	179382
TPI1	P60174		97662.3	147809
TRAP1	Q12931	1560000		1580000
TRAV36DV7	A0A075B6V5	1460000			1490000	1720000		1120000		924930	848459	812551	1600000
TRHDE	Q9UKU6	568990	516063	523242
TSKU	Q8WUA8	1030000	1160000	895401
TSPAN2	O60636							560570	386439	531901	280866	213977	270307
TST	Q16762	650463	695375	679062
TTR	P02766	12600000	12500000	10500000	1760000	2110000	1520000	1870000	2070000	2110000	3520000	3810000	3270000
TUBA1A;TUBA1C	Q71U36;Q9BQE3	2490000	2700000	2810000	995745			1070000	1100000			638021
TUBA4A	P68366	2380000	2160000	2440000		522478	602114		1190000	821293	1050000	797736	912942
TUBB	P07437	2300000	2150000	1990000	2720000			222190	464398	174062	759875	695355	898334
TUBB1	Q9H4B7	711702	741329	781859							234952	241899
TUBB4B	P68371	1030000	1060000	967812
TYMP	P19971	143690	122181	216857
UGDH	O60701	1360000	1300000	1340000					614266	78562.5
UGP2	Q16851	421683	418120	423352	433291						602401	824160	1410000
UMOD	P07911	422900	453316	381268					149769	111102
USP14	P54578	341250	295982	323565
VASN	Q6EMK4							595649	524291	667400
VAT1	Q99536	2750000	2310000	2470000
VCAM1	P19320	683570	668035	687111				664446	613067	591811	407395	479366	393337
VCAN	P13611	807330	881124	802381				982812	927454	986269		1080000
VCL	P18206	1100000	1130000	1070000	543463	341377	515393
VCP	P55072		345841		285415	334531	450968	595009	710080	583875	865371	889716	1010000
VIM	P08670	298680	384011	350250	469968						250231	177965
VNN1	O95497							211410	202877	186206	270189		151953
VPS4A;VPS4B	O75351;Q9UN37
VTN	P04004	59400000	97300000	61400000	18400000	18000000	18100000	16300000	15300000	17300000	28800000	30500000	37800000
VWF	P04275	1110000	722445	894308	4020000	4040000	3850000	31900000	23100000	27800000	11200000	9480000	14200000
WARS1	P23381	293000	276111	381889
XPNPEP3	Q9NQH7
XPO1	O14980	70680.4	53334.9	95879.7
YARS1	P54577	413041	355009	307899
YKT6	O15498	306767	301727	361003
YWHAB	P31946	191199	139482	204659					283978	177909
YWHAH	Q04917	354256	248947	284535
YWHAQ	P27348	405875	279243	377190
YWHAZ	P63104	1130000	1090000	1060000		1340000		551808	920155	857854	725205	550382	681780

## Sheet: Table S2
Tab Name	Description
Table S1	The unique proteins identified from EVs isolated using different methods
Column Name	Description
Beads	DSPE-functionalized beads
Kit	commercial kit for polymer precipitation method
UC	ultracentrifugation
SEC	size-exclusion chromatography
Beads	Kit	UC	SEC
ITGAM	FSTL1	EXTL2	RALA;RALB
PTN	BPIFA1	PFKL	IGKV2-28;IGKV2D-28
C3orf85	MYLK2	GALC	DEFA1B;DEFA3
APOL2	PRB4	CD9	KRT4
IHH		ANKRD18A	HSPA1A;HSPA1B
HPN		C6orf120	RPS27A;UBA52;UBB;UBC
NAPA			TUBA1A;TUBA1C
FGL2			ANKRD18A;ANKRD20A1;ANKRD20A2P;ANKRD20A3P;ANKRD20A4P;ANKRD20A8P
ASGR2			IGHV3-30;IGHV3-30-5
LMAN1			CD81
GDF15			EEF1A1;EEF1A1P5
HMGCS2			VASN
CLSTN1			GNAO1
LMAN2			RPS2
MFAP4			LGALS7B
MMP3			COL4A1
GALK1			IGKV1-12;IGKV1D-12
DSC3			COL6A2
CD1D			CHL1
PCDH1			ACTA2;ACTG2
KNDC1			ARF1;ARF3
MGLL			IGKV2-40;IGKV2D-40
NSF			H2BC10;H2BC12;H2BC12L;H2BC13;H2BC14;H2BC15;H2BC18;H2BC5;H2BC9
GLRX3			GGT1;GGT2P;GGT3P
PLIN4			IGKV2-30;IGKV2D-30
ANGPTL4			SRGN
LEP			IGKV1-39;IGKV1D-39
RAB8B			CNNM2;CNNM4
MMP8			COL1A2
PLA2G12B			IGKV2-24;IGKV2D-24
OPTN			IGKV1-33;IGKV1D-33
B3GALNT1			H2AC12;H2AC14;H2AC17;H2AC19;H2AC20;H2AC25;H2AC6;H2AC7;H2AC8;H2AJ
HNMT			IGHV3-43D;IGHV3-9
CAND1			APP
DMKN
PRL
TIMP3
MAPK1
IGF2
TSKU
RPS10
AARS1
ADAMDEC1
PPP3CA
FABP1
CAPNS1
EFHD2
ST3GAL1
RAB6A
PLA2G2A
FSCN1
CAPN2
LGALS1
USP14
TPI1
DSTN
SLC25A5
POLE2
ST8SIA4
GMPR
RPL12
ADH5
FABP5
YWHAQ
XPO1
MGAT5
CCT2
ARF4
SSB
GNMT
CXCL12
A4GALT
GPD1
NPM1
CCT8
MENT
NUCB1
PCDH18
PPBP
NRP2
STIP1
SPTA1
HSP90AB1
ARF5
NOTUM
NCL
MFAP5
CST3
SFTPB
SNCG
CHGA
GAL3ST4
NOMO1
CHST12
CDHR5
AHCY
PLXNB2
FKBP4
TST
KHK
AKR7A3
PBLD
PF4V1
ERP44
SPON2
LCA5L
SRPX
PPP2CA
ENO3
CD209
LECT2
SUGP2
PITPNA
FBLN7
ILK
MAPK14
YWHAH
RNH1
CSRP1
CTSB
WARS1
PSMC5
ADGRL4
GALE
PCBP1
HAGH
OXSR1
CNDP2
SULT1A1
SPON1
PPIP5K2
LPL
PMVK
DDI2
LIPC
ENPP1
PLIN3
MPP1
PHGDH
TUBB4B
CCT5
RAB1A
EIF5A
LIPA
CHST14
ADH1C
PTP4A1
CTSA
GNB1
RIC8A
GRHPR
ATP5F1A
HSD11B1
RUNDC3B
YKT6
CDH6
FMOD
CCT6B
YARS1
PRDX5
GYG1
CSE1L
TRHDE
GPC6
SEMA3B
GDF7
ENPP2
DOCK7
CIDEB
ITGA2
VAT1
BPI
PCOLCE2
ART4
NPL
TCN2
PLS3
GBA1
INHBB
MYH7B
RPLP2
CPQ
CCDC126
APRT
CTSF
PDXP
LY96
CLIC1
NNMT
TYMP
PITPNB
TRAP1
GKN2
PTBP1
EPHX2
PDGFC
PSME1
ETF1
HNRNPC
H1-2
ENTPD5
ADGRG6
MMP9
PLIN1
OLFM2

## Sheet: Table S3
Tab Name	Description
Table S3	Raw data of protein identification from EV samples extracted using DSPE-Beads and DSPE-Biotin
Column Name	Description
Genes	Gene names corresponding to quantified proteins
UniProt ID	UniProt ID corresponding to quantified proteins
Genes	UniProt ID	DSPE_Biotin1	DSPE_Biotin2	DSPE_Biotin3	DESP_Beads1	DESP_Beads2	DESP_Beads3
A1BG	P04217	15400000	20100000	9960000	2530000	2560000	2270000
A2M	P01023	58900000	104000000	57400000	16700000	9620000	20900000
A2ML1	A8K2U0	212042			128909	143963	95802.4
A4GALT	Q9NPC4				484577	347603	575528
ACTN1	P12814						40741.1
ACTR2	P61160	12708.9			36009.1
ADAMDEC1	O15204	83124.5	134734	153043	126399	371360	148032
ADAMTS13	Q76LX8		146155	240377	1020000	1070000	1090000
ADAMTSL4	Q6UY14			32700.7
ADGRF5	Q8IZF2					339680	226403
ADGRG6	Q86SQ4				961855	1240000	882576
ADGRL4	Q9HBW9				204754	224513	239037
ADH4	P08319	636726	394941	945879	1710000	1620000	1560000
ADH5	P11766					118001	213646
ADIPOQ	Q15848	236467	340811	235368	133827		137686
ADSL	P30566	76954.6		120704	304595	224645	319841
AFM	P43652	5760000	6760000	4060000	10600000	11900000	11400000
AGT	P01019	7520000	7370000	6000000	121000000	112000000	135000000
AHCY	P23526	100988				69653.6	80475.6
AHSG	P02765	46900000	42300000	66800000	38200000	36100000	42200000
AHSP	Q9NZD4					167521
AK1	P00568	398213	320728	405665	428432	776799	540730
AKAP9	Q99996	324018	532683	318319
ALB	P02768	2110000000	2540000000	1480000000	1710000000	1750000000	1710000000
ALDH1A1	P00352			121098	347476	311492	460451
ALDOA	P04075	422255	138837	403109	350236	649493	419366
ALOX12B	O75342	146576			141211	128187
AMBP	P02760	15500000	20900000	17700000	36600000	38000000	38800000
ANG	P03950	933189	343707	818791		351413	332986
ANGPTL3	Q9Y5C1	400299	166784	451021	1590000	1580000	1800000
ANGPTL6	Q8NI99	83829.1	146322	183133	227889	210313	206424
ANGPTL8	Q6UXH0	1060000		975289	1710000	1440000	1750000
ANK1	P16157	72582.6	119501	91840.8	95593.4	73225.7	369394
ANPEP	P15144	339848	134269	314458	573855	549808	620537
ANTXR1	Q9H6X2	277157	82116.6	414903	2060000	1860000	2310000
ANTXR2	P58335	718510	192805	682015	4410000	4500000	4800000
ANXA1	P04083	138325	51629.5	84752.5	324405	234780	271972
ANXA11	P50995			160671	495153	448220	566278
ANXA2	P07355	593933		175219	471268	516698	1860000
ANXA7	P20073				37973.6
APCS	P02743	5460000	6260000	4030000	1910000	1530000	1950000
APMAP	Q9HDC9	7350000	4470000	9980000	44900000	43000000	50500000
APOA1	P02647	4180000000	1540000000	4290000000	7510000000	11000000000	5890000000
APOA2	P02652	37900000	17900000	50600000	425000000	521000000	212000000
APOA4	P06727	204000000	109000000	220000000	1530000000	1310000000	759000000
APOA5	Q6Q788	10000000	3780000	14200000	19100000	15500000	20200000
APOB	P04114	391000000	105000000	351000000	170000000	126000000	133000000
APOC1	P02654	40100000	54400000	49800000	508000000	333000000	298000000
APOC2	P02655	40100000	28200000	32200000	110000000	176000000	84100000
APOC3	P02656	104000000	246000000	113000000	384000000	380000000	209000000
APOC4	P55056	42200000	17700000	42300000	8980000	6340000	6760000
APOD	P05090	3070000	5900000	3320000	1210000000	804000000	1070000000
APOE	P02649	1030000000	253000000	977000000	1760000000	1820000000	2080000000
APOF	Q13790	2450000	3970000	1540000	8530000	5720000	4530000
APOH	P02749	16000000	18900000	9770000	4130000	3420000	5050000
APOL1	O14791	46200000	16000000	52400000	227000000	217000000	230000000
APOM	O95445	98300000	34400000	80000000	66600000	95500000	49900000
APRT	P07741				206833	160957	210677
ARF4	P18085			365596	858692	659208	857643
ARF5	P84085	129162				381759	560395
ARF6	P62330	232090	150335	538269	652687	734556	679368
ARG1	P05089	1000000	188001	185566	892609	1360000	426376
ARGLU1	Q9NWB6	482328		496579
ASAH1	Q13510				357726	459653	191661
ASGR2	P07307	146290			367032	489086	362571
ASPN	Q9BXN1	967818	624360	1390000	1490000	1390000	1870000
ATG3	Q9NT62	83535		99384.6	91763.6		126188
ATP5F1A	P25705	580425		389594		257376	69173.9
ATP5F1B	P06576	741005	130792	408374	327489	450106	305278
ATP6AP2	O75787	738597	361157	918324		531162
ATP6V1B2	P21281	249411		172622	450118	196701	220437
ATP6V1E1	P36543	47556.1		37264.5
ATRN	O75882	611305	655876	375765	311902	335808	323362
AZGP1	P25311	1850000	2920000	1020000	1350000	1360000	1090000
B2M	P61769	252879	313692	194583	109211	270940	77842.3
B4GALT1	P15291	309428	305152	819335	186865	146770	266779
BCHE	P06276	799554	1040000	642920	1760000	1000000	3050000
BLMH	Q13867	1570000	327016	418226	1820000	2670000	1330000
BLVRA	P53004				207810	211849	233560
BLVRB	P30043	940735	997827	1490000	10900000	15500000	13600000
BMP1	P13497				208449	216199	187414
BNC2	Q6ZN30	13900000	9180000	15700000	7110000	20600000	6100000
BPGM	P07738				309323	175706	222809
BPI	P17213	860916	382829	1070000	3320000	2640000	3300000
BPIFB1	Q8TDL5	4420000	2470000	4230000	6410000	5680000	6840000
BPNT2	Q9NX62			50420.4	294442	255462	329358
BTD	P43251	460241	587081	259183	288344	316882	348008
C1QA	P02745	5210000	5320000	6480000	3800000	1840000	3080000
C1QB	P02746	18300000	20000000	20900000	3810000	2740000	3860000
C1QC	P02747	12100000	11100000	12900000	2310000	1750000	2440000
C1R	P00736	10100000	9840000	17500000	54800000	72100000	61700000
C1RL	Q9NZP8	3430000	2880000	4310000	7320000	8690000	7520000
C1S	P09871	10800000	9870000	13600000	83800000	99400000	93200000
C2	P06681	1920000	2570000	1770000	6080000	6360000	6170000
C3	P01024	132000000	157000000	142000000	42800000	28100000	42300000
C3orf85	A0A1B0GTC6	195361	313462	431663	1680000	2000000	860523
C4A	P0C0L4	6410000	7040000	7840000	10300000	7480000	11900000
C4B	P0C0L5	12200000	16100000	16500000	13300000	10900000	16000000
C4BPA	P04003	15500000	20100000	20400000	9590000	9000000	13200000
C4BPB	P20851	2080000	2640000	3040000	317088	173069	264525
C5	P01031	2700000	4150000	2440000	3230000	2610000	3570000
C6	P13671	1180000	1690000	1200000	520035	395977	457912
C6orf120	Q7Z4R8				3140000	203146	1840000
C7	P10643	2500000	3120000	2600000	19400000	20600000	19400000
C8A	P07357	2380000	2930000	2210000	1110000	891683	1160000
C8B	P07358	2490000	2550000	3340000	1800000	1320000	1750000
C8G	P07360	2230000	2660000	2470000	1130000	1050000	1090000
C9	P02748	12900000	9880000	16700000	13600000	14600000	14700000
CA1	P00915	1580000	1740000	1440000	3100000	2810000	2980000
CA2	P00918	1020000	931514	1990000	4670000	5230000	5270000
CA6	P23280	91862.5	57326.3	92792.5	743172	798074	827552
CAB39	Q9Y376				330631	313180	358103
CALML5	Q9NZT1		613191	586655	3260000	2520000	3020000
CAMK2A	Q9UQM7	1250000	421057	535840	1840000	639421	1120000
CAMK2B	Q13554	499087	191633		1040000	485817	43129.3
CAMP	P49913	10800000	2360000	8700000	20400000	12500000	28000000
CAMTA1	Q9Y6Y1	221088	312417	331022
CAND1	Q86VP6	125855		167404	721202	714052	816762
CAPN1	P07384	323903	375663	332878	1550000	1280000	1740000
CAPN2	P17655				55138	153549	135593
CAPNS1	P04632	429651	290224	687400	807998	1120000	969905
CARHSP1	Q9Y2V2			34356.3
CASP14	P31944	763072	288713	240021	1100000	1480000	2080000
CAT	P04040	393752	230727	120618	473885	588853	346845
CCDC126	Q96EE4		109027		243433	261724	120340
CCN2	P29279	236760		140365
CCT2	P78371	187325	225847	371854	372360	271098	376834
CCT3	P49368	253733		136957	320176	388225	391887
CCT4	P50991	218607		186234	573260	578265	560575
CCT5	P48643			76151.7	261045	292522	292135
CCT6A	P40227		153329	274412	517340	403176	577887
CCT6B	Q92526				256871	457867
CCT7	Q99832			188630	646765	543914	672055
CCT8	P50990	204535		341997	655788	658719	715242
CD14	P08571	4870000	2550000	6820000	8010000	7180000	8080000
CD1D	P15813				72607	124181	99353.9
CD209	Q9NNX6					227741
CD248	Q9HCU0					123180	102033
CD36	P16671	80076.8		153594	78150.5
CD44	P16070	265984	186247	229864	180829	258757	211786
CD5L	O43866	8990000	7980000	7780000	27700000	22500000	29200000
CD9	P21926	160878
CDC42	P60953			132135	168964	259318	188010
CDH1	P12830	1160000	335228	946433	873478	855503	812030
CDH18	Q13634	173028		178673	206394		129369
CDH5	P33151	797300	725962	841638	5460000	6150000	5450000
CDSN	Q15517	610986			1070000	2450000
CES1	P23141				172253		138061
CES2	O00748					117001
CETP	P11597	24300000	17300000	31500000	69600000	80600000	82600000
CFB	P00751	13500000	17800000	10700000	3810000	2410000	3830000
CFD	P00746	441104	417233	431321	214038	340076	253945
CFH	P08603	9830000	13500000	8150000	5580000	3950000	6460000
CFHR1	Q03591	501979	593732	389408	600705	605145	798275
CFHR2	P36980	895046	800331	656713	255163	259754	319434
CFHR4	Q92496	553022	580791	370296	731204	1010000	1240000
CFHR5	Q9BXR6	216831	216988	245521	341375	317512	424737
CFI	P05156	3080000	3840000	2610000	1100000	878500	1260000
CFL1	P23528			1610000	2350000	2940000	2190000
CFP	P27918	1060000	1140000	1200000			288352
CHGA	P10645	12800.4		55482.7	18437.9		18293.9
CHMP1B	Q7LBR1				107935		109077
CHST12	Q9NRB3				143296	151779	224400
CLEC11A	Q9Y240					62052.7	72778.9
CLEC3B	P05452	1590000	1820000	1530000	344926	517164	429292
CLIC1	O00299	250402			1110000	1360000	1100000
CLTC	Q00610	132978
CLU	P10909	140000000	77100000	149000000	190000000	291000000	155000000
CNDP1	Q96KN2	1510000	1150000	1740000	22400000	26800000	24100000
CNN2	Q99439	96779.6	76673.4	209334	74886.2	107841	125702
COASY	Q13057						110561
COL18A1	P39060	376507		569257	1240000	1080000	1290000
COL6A3	P12111	492268	407395	734929	727329	776462	779187
COLEC10	Q9Y6Z7	532536	498924	951140	4640000	4130000	4150000
COLEC11	Q9BWP8	1070000	784376	1300000	1850000	2590000	1960000
CORO1C	Q9ULV4	3000000	1340000	1610000	6700000	1930000	5650000
CP	P00450	14700000	19600000	11200000	8980000	6770000	8390000
CPA4	Q9UI42	171795			111753	182348	222474
CPB2	Q96IY4	5360000	4570000	8030000	63400000	55200000	61100000
CPN1	P15169	789249	1390000	679258	423285	288178	461823
CPN2	P22792	1970000	2310000	2110000	2260000	2350000	2540000
CPNE3	O75131						148421
CPQ	Q9Y646	62276.3			465957	547909	489528
CRISPLD2	Q9H0B8			132714
CRP	P02741	277665	808610	865304	628122	431746	675157
CRTAC1	Q9NQ79	509587	453894	704852	3440000	3630000	3370000
CSE1L	P55060			88708.6	73482.2	204188
CST3	P01034	1100000	1020000	1280000	1520000	1580000	1440000
CSTA	P01040		311338		371051	274100
CTSA	P10619				158343	260292	282448
CTSD	P07339	936216	444789	509904	1680000	1640000	2740000
CTSF	Q9UBX1				437782	552184	531379
CTSG	P08311	134776	87704.7	96927	320173	256146	389965
CUL3	Q13618				271917	208929	297249
CXCL12	P48061	679830	504412	876581	1320000	1430000	1520000
CYC1	P08574	40302.4
CYRIB	Q9NUQ9					269310	290608
DCD	P81605	5100000	4280000	2850000	11300000	4840000	7460000
DDI2	Q5TDH0	69241.4		137756	198628	247235	271015
DDX46	Q7L014	1930000	1140000	1780000	917857	3560000	942099
DDX55	Q8NHQ9	562747	1210000
DIPK2A	Q8NDZ4	38582.8	56768.5	99231.2	116277	122667	162993
DMKN	Q6E0U4	251249		424132	304649	289015	266199
DNAAF1	Q8NEP3	564914	1430000	421750	161120	456925	260002
DNAJB1	P25685			190764	122119		112854
DNAJC3	Q13217			184517	254757	398153	223460
DNM2	P50570					14481.3
DPP4	P27487				480642	334988	536483
DSC1	Q08554	968985	205366	213940	781895	1370000	150493
DSC3	Q14574	306500			354741	619801
DSG1	Q02413	3150000	695929	440704	2840000	4460000	588634
DSG2	Q14126			366280	1770000	1840000	1720000
DSP	P15924	2700000	500783	198566	1880000	2350000	1480000
ECM1	Q16610	761958	704983	564410	327884	371127	299619
EEF1G	P26641	116279		67583.4	79639.3	180563	78825.8
EEF2	P13639	419695	82970.4	181151	315354	554155
EFEMP1	Q12805	3130000	2640000	8190000	1480000	916502	2170000
EFEMP2	O95967				123537	213012
EHD1	Q9H4M9			67060.7	296650	176389	329018
EIF2S1	P05198				133647		135931
EIF4A1	P60842	127443			50786.5	127902	114652
EIF5	P55010				69466.8	115489	109736
ENO1	P06733	2630000	1930000	4070000	7580000	6900000	7980000
ENO2	P09104			135672	160346	182539	158852
ENO3	P13929	1450000				127929	143939
ENPP2	Q13822			35749.8	519495	713513	487049
ENTPD5	O75356			67421.6	492506	516448	546817
EPB41	P11171					153382	191810
EPB42	P16452	98226.8	132817	173615	128606		386928
ESD	P10768				37703.8	80912.6
ETF1	P62495				27432.7	197007	206691
EZR	P15311			107938
F10	P00742	1300000	1780000	1160000	1150000	1150000	1140000
F11	P03951	481009	540915	612163	393886	226902	202315
F12	P00748	2630000	2590000	2720000	768227	716375	706034
F13A1	P00488	554753	738583	627016	258320		247726
F13B	P05160	923262	847962	855379	343868	202994	500596
F2	P00734	8200000	10400000	7960000	2730000	2160000	2790000
F5	P12259	3380000	2290000	4290000	2390000	2710000	2660000
F7	P08709	1280000	942958	2080000	20900000	22400000	21200000
F8	P00451	37528.1		51042.1		90950.9	125328
F9	P00740	1520000	1610000	2020000	43800000	56000000	42700000
FABP5	Q01469	227897	465582		832476	802733	434726
FAM114A2	Q9NRY5	79452.1			66118.2	89705.9
FAM133B	Q5BKY9			206429
FAP	Q12884			30278.7	148876	165566	194915
FBLN1	P23142	4270000	4150000	6870000	2240000	1690000	3330000
FBLN5	Q9UBX5	669432	759889	1940000	394873	245028	703057
FBLN7	Q53RD9			142822	735011	814953	987233
FBXO7	Q9Y3I1		566605	815628	967829	893719	1110000
FCGBP	Q9Y6R7	381144	378470	331277
FCGR3A	P08637		322736		125203	132743
FCN2	Q15485	2510000	615695	2610000	980162	1210000	1110000
FCN3	O75636	1080000	1600000	1110000	2480000	3180000	2350000
FERMT3	Q86UX7	413274	294109	710749	530562	590024	572215
FETUB	Q9UGM5	1310000	1180000	1800000	918292	1540000	881365
FGA	P02671	217000000	188000000	306000000	105000000	66100000	136000000
FGB	P02675	303000000	268000000	446000000	199000000	123000000	226000000
FGFBP2	Q9BYJ0	203179	99179.2	169036	302294	272672	279070
FGG	P02679	163000000	134000000	220000000	80000000	56800000	100000000
FGL1	Q08830	524224	609200	839984	910466	1290000	1050000
FGL2	Q14314				93051.6	111938
FLG	P20930	537079	231734	234428	946787	586025	1320000
FLG2	Q5D862	1650000	390188	482565	1510000	2460000	440776
FLNA	P21333	166428		181509	112711	156835	128173
FN1	P02751	2540000	2520000	2630000	1040000	651997	1490000
FSCN1	Q16658	801938	388032	531366	1930000	392007	1540000
G6PD	P11413				97133.6	163113	200384
GANAB	Q14697			209781	289475	404035	389260
GAPDH	P04406	4600000	2270000	5190000	6960000	6660000	8390000
GAS6	Q14393				103195		110262
GBA1	P04062				223059	524736	644271
GC	P02774	31300000	33000000	17600000	12600000	12000000	11900000
GCA	P28676	1490000	1020000	1630000	4280000	3040000	4840000
GCLC	P48506				574688	560993	680281
GCLM	P48507				661378	656751	671431
GDI2	P50395					44446.3
GET3	O43681				490454	489527	570767
GFAP	P14136	1410000	761186		3300000	740735	2660000
GGCT	O75223	460668			280641	467661	881472
GGH	Q92820	263538	139241	92218.7	188914	144905
GKN2	Q86XP6			44467.7
GLIPR2	Q9H4G4				261575	204146	305017
GLO1	Q04760			91274.2		252425
GLRX	P35754				189522	248525	164761
GLTPD2	A6NH11		121808	424880	1130000	937027	1190000
GM2A	P17900				756524	761134	744080
GMEB1	Q9Y692				518314	391879	489700
GMPR	P36959			292697	296090	528697	290710
GNB1	P62873					160752	208099
GNPTG	Q9UJJ9		130211	175008	373058	280877	296932
GOLGA3	Q08378	982378	304053	1210000	1760000	594766	836051
GP1BA	P07359		1270000	796118
GP5	P40197	70071.4	75246.3	68692.2	82606.3	137461	154673
GPLD1	P80108	4320000	2930000	5150000	77300000	78400000	83900000
GPX1	P07203			241800
GPX3	P22352	2980000	3300000	4070000	3580000	4130000	4140000
GSDMA	Q96QA5	479065	90576.7		292974	752756	647265
GSN	P06396	7530000	8480000	8070000	4880000	4700000	5040000
GSTO1	P78417	135336	88558.9	143409	543037	906063	630634
GXYLT1	Q4G148				125164	117703	160627
GYG1	P46976	343778		528863	777549	727837	831083
H1-5	P16401	353886	110180	378463		391383	330847
H4C1	P62805	5710000	674260	1970000	675997	2290000	566122
HABP2	Q14520	5420000	3370000	5170000	6410000	9460000	7200000
HAGH	Q16775	514310	492878	759190	2120000	1900000	1680000
HAL	P42357				149203	526871	251346
HBA1	P69905	84600000	101000000	84500000	21800000	21700000	21800000
HBB	P68871	117000000	165000000	116000000	40600000	33300000	38200000
HBD	P02042	2870000	4200000	2820000	1130000	714664	820503
HEBP1	Q9NRV9			116514
HGFAC	Q04756	522402	555330	511854	991221	885543	916023
HLA-A	P04439	74334.9		225710		541163	675166
HLA-B	P01889				239731		285445
HLA-C	P10321	51271.7		62354.7		56208.3
HNRNPA1	P09651	88270.8
HNRNPA3	P51991			19644.5
HNRNPD	Q14103					83903.6
HNRNPK	P61978	169895	88388.2	159689		170501
HP	P00738	130000000	159000000	103000000	44000000	39100000	50200000
HPR	P00739	15000000	6860000	14100000	102000000	98300000	100000000
HPRT1	P00492			56592.7	89285.2	129908	132359
HPX	P02790	99100000	113000000	69000000	122000000	122000000	118000000
HRG	P04196	9870000	10800000	7080000	6210000	5300000	5840000
HRNR	Q86YZ3	574028	251256	131719	1290000	765403	384915
HSD11B1	P28845				203466	188315	239853
HSP90AA1	P07900	553277	93660.7	144036	328243	406609	204305
HSP90AB1	P08238	397080		245609	149833	416838	164809
HSP90B1	P14625	636540	300155	606486	3760000	4040000	3910000
HSPA5	P11021	514560	210801	317929	556461	623773	683139
HSPA8	P11142	547531		249688	321717	593191
HSPB1	P04792	284135	170474	150422	479456	213075	520500
HSPD1	P10809	123919		71404	130149	116061
HTATIP2	Q9BUP3				446523	351092	491048
HTRA1	Q92743	177248	234671	332873	380139	527231	288170
HYDIN	Q4G0P3	8450000	14200000	7600000	2250000	1470000	2930000
HYI	Q5T013	1910000		1190000	623098	2700000
HYOU1	Q9Y4L1	60155.7			519141	433595	559666
IDH1	O75874	65855.5	47140.5	82602.8	348919	370710	397589
IGF2	P01344	197447	1280000	217556	480080		364722
IGFALS	P35858	1640000	1770000	1050000	5120000	6050000	4610000
IGFBP3	P17936	314793	434851	603424		394185	70330.8
IGHA1	P01876	58500000	101000000	61600000	42300000	37900000	45400000
IGHA2	P01877	11700000	16800000	10700000	8510000	9870000	8970000
IGHD	P01880	887982	1450000	694461
IGHG1	P01857	454000000	632000000	422000000	182000000	119000000	198000000
IGHG2	P01859	417000000	587000000	399000000	176000000	97600000	140000000
IGHG3	P01860	10800000	19400000	11000000	3910000	2590000	4450000
IGHG4	P01861	37400000	41300000	24100000	17700000	5160000	11300000
IGHM	P01871	132000000	90500000	128000000	138000000	98800000	140000000
IGHV1-18	A0A0C4DH31		693980	565471	412311		269659
IGHV1-2	P23083		1050000	654950	766232
IGHV1-3	A0A0C4DH29	678489	739434	562732	169908
IGHV1-46	P01743	170555	222354	201996	147406
IGHV1-69	P01742	547184	1150000	559852
IGHV2-26	A0A0B4J1V2	1350000	1660000	1200000
IGHV2-70D	A0A0C4DH43	8280000	12100000	6880000	1860000	1160000	2330000
IGHV3-13	P01766		227844	330344	872865	526783	938836
IGHV3-15	A0A0B4J1V0	550585	1050000	569141	217473	216904	321246
IGHV3-35	A0A0C4DH35	320436	601679	434343	1330000		1220000
IGHV3-38	A0A0C4DH36	1610000	1900000	1760000			887257
IGHV3-49	A0A0A0MS15	4050000	7620000	3480000	1450000	628564	1330000
IGHV3-64D	A0A0J9YX35	1060000	804609		899316		1060000
IGHV3-7	P01780	9310000	10800000	6070000	3220000	4180000	3500000
IGHV3-72	A0A0B4J1Y9		148259
IGHV3-73	A0A0B4J1V6	416789	599277	374562
IGHV3-74	A0A0B4J1X5	18700000	20400000	14900000	5520000	3080000	5280000
IGHV4-28	A0A0C4DH34	4730000	9140000	4860000	2070000	950865	2030000
IGHV4-4	A0A075B6R2	149762	247337	128577
IGHV5-10-1	A0A0J9YXX1	4580000	4780000	3460000	1040000	377145	1300000
IGHV5-51	A0A0C4DH38	2230000	2990000	1980000	996896	663936	1070000
IGHV6-1	A0A0B4J1U7	10000000	14700000	9220000		1380000	2390000
IGKC	P01834	101000000	89200000	75100000	47600000	30000000	41900000
IGKV1-16	P04430	477212	469112	472605
IGKV1-17	P01599	1100000	1710000	1180000	498948	341639	303955
IGKV1-5	P01602	8560000	11300000	6430000
IGKV1-6	A0A0C4DH72	1080000		1320000
IGKV2-29	A2NJV5	687014	941815	587607		170592	252431
IGKV3-20	P01619	23700000	38100000	21300000	6160000	3830000	5270000
IGKV3-7	A0A075B6H7		2250000
IGKV3D-15	A0A087WSY6	2780000	3320000	2590000	540639	483996	579053
IGKV3D-20	A0A0C4DH25	3260000	4770000	2920000	400368	305554	520111
IGKV4-1	P06312	12800000	15400000	10900000	4700000	3730000	5120000
IGLC7	A0M8Q6		19702.7
IGLL1	P15814		10600000
IGLL5	B9A064	6860000	17100000	6440000	2260000	2040000	3350000
IGLV1-40	P01703	608441	1520000	670067
IGLV1-47	P01700	2290000	4090000	2640000	956032	393384	310357
IGLV1-51	P01701	4060000	9130000	3670000
IGLV2-11	P01706	3010000	2920000	2880000
IGLV2-18	A0A075B6J9	445586	977980	442256		117359
IGLV2-23	P01705	790114	928958	654384
IGLV2-8	P01709	1170000	2240000	1290000	526846	285264	471595
IGLV3-10	A0A075B6K4	428962	876426
IGLV3-19	P01714	2210000	886465	2050000	618105	570197	512458
IGLV3-21	P80748	1490000	2480000	971102
IGLV3-25	P01717		538895
IGLV3-9	A0A075B6K5	1430000	1680000	1170000
IGLV5-45	A0A087WSX0	614227		458037
IGLV6-57	P01721	653752	1430000	629121
IGLV7-43	P04211	265596	181267	286696
IGLV8-61	A0A075B6I0	4590000	3050000	3860000	461255	476015	454688
IGLV9-49	A0A0B4J1Y8	2030000	2200000	1410000		221473	214587
IHH	Q14623	455227		501383	1390000	1920000	1280000
IL1RAP	Q9NPH3	167742	200660	129859	254104	209428	340613
ILK	Q13418			350410		255154
IMPA1	P29218					41598.2	277376
INA	Q16352	758668	455933	467360	1580000	594330	891296
INHBC	P55103	1880000	1380000	2880000	21200000	23600000	20900000
INHBE	P58166				588252	733173	770350
IST1	P53990	78183.6		101943			107208
ITGA11	Q9UKX5				250586	209511	259110
ITGA2	P17301	256817	47934.3	252275	472469	444817	457908
ITGA2B	P08514	761799		668997	556249	452000	717364
ITGA6	P23229			171345	193736	56560.8
ITGAM	P11215				466612	432925	472672
ITGB1	P05556	482790		542601	1460000	1370000	1430000
ITGB2	P05107				354908	403512	522925
ITGB3	P05106	319133	237635	388977	790221	293922	355546
ITGB6	P18564	491553		441483	1890000		1750000
ITIH1	P19827	7670000	9850000	8670000	7280000	8700000	6700000
ITIH2	P19823	18500000	23100000	21400000	29600000	34600000	28400000
ITIH3	Q06033	3120000	3640000	2720000	5410000	6330000	5610000
ITIH4	Q14624	13300000	16100000	14500000	7280000	5640000	7760000
ITLN1	Q8WWA0	304746	578315	635285	2100000	3200000	2520000
ITM2B	Q9Y287				74437.3	193657	105834
ITSN1	Q15811			88102.9
JCHAIN	P01591	26800000	25700000	21500000	3080000	2810000	2140000
JUP	P14923	2120000	568177	85353.1	1030000	1520000	934433
KLK11	Q9UBX7		83210.4
KLK7	P49862	58329.1
KLKB1	P03952	2590000	2790000	2430000	2590000	2390000	2910000
KNG1	P01042	30300000	29800000	32600000	190000000	221000000	219000000
KPLCE	Q5T750	792605				230590
KPNB1	Q14974				387916	364127	437182
KPRP	Q5T749	4640000		189627	816933	1780000
KRT1	P04264	190000000	36800000	19200000	207000000	263000000	61500000
KRT10	P13645	191000000	25100000	16800000	105000000	290000000	63400000
KRT14	P02533	5000000	890422	525428	2710000	4780000	8730000
KRT15	P19012						218915
KRT16	P08779	3310000	645998		844240	1520000	16000000
KRT17	Q04695	930136	760893		267108	500507	3470000
KRT2	P35908	65800000	8680000	4650000	28300000	79800000	6090000
KRT23	Q9C075					261057	210329
KRT31	Q15323	5080000
KRT33B	Q14525	2510000
KRT35	Q92764	1350000
KRT36	O76013	667716
KRT4	P19013						363042
KRT5	P13647	18200000	1770000	850418	9580000	17900000	10800000
KRT6A	P02538	666101	255185		483421	572413	13400000
KRT6B	P04259	1140000			688662	314435	1740000
KRT76	Q01546		53453.8
KRT77	Q7Z794	368846		270132	609854	1630000
KRT78	Q8N1N4	2030000	337297	133271	1450000	2460000	885695
KRT80	Q6KB66	361245			452335	601514	394579
KRT82	Q9NSB4	6600000
KRT83	P78385	935439
KRT85	P78386	8110000
KRT9	P35527	53000000	19800000	7980000	109000000	58100000	14900000
KRTAP11-1	Q8IUC1	6510000
KRTDAP	P60985	71591.8	181559	90996.9	789748	551497	416693
LAMP1	P11279	145207			122857	229754	156848
LBP	P18428	200000000	152000000	316000000	939000000	987000000	1010000000
LCAT	P04180	1650000	1670000	1870000	5440000	7410000	5330000
LCN1	P31025				131648
LCP1	P13796	99803.7	147219	116151	317777	539686	346126
LDHA	P00338	226504	93410.5	174435	210302	405080	248033
LDHB	P07195	361639	248412	287335	356795	527829	370836
LECT2	O14960	333411	100055	461279	1260000	1270000	1400000
LEP	P41159				59709.6	89220.8	146468
LFNG	Q8NES3				284283	293518	295163
LGALS1	P09382	127924	251390	178575	200290	531924	126926
LGALS3BP	Q08380	3460000	2010000	2930000	550732	451901	738795
LGALS7	P47929	185125			416099	513553	211036
LIPA	P38571				781780	861142	665646
LIPC	P11150				263067	387133	359734
LIPG	Q9Y5X9				348463	477162	451731
LMAN2	Q12907				1960000	1800000	1250000
LMNA	P02545					211531	158983
LORICRIN	P23490	1250000			773825	953118
LPA	P08519	21200000	4460000	13200000	6020000	6210000	6830000
LPL	P06858	328361	154684	408942	459995	517356	337125
LRG1	P02750	363104	1880000	218942
LSR	Q86X29				67398	76829.6	76470.5
LTA4H	P09960				212180	211843	194751
LTBP1	Q14766	549306	484720	840604	504189	584168	633798
LTF	P02788	741619	539905	596963	411670	518929	446108
LUM	P51884	4090000	4320000	3080000	48600000	81800000	45700000
LYVE1	Q9Y5Y7	227535	344154	100960
LYZ	P61626	1730000	779609	1270000	982271	788145	748738
MADCAM1	Q13477				546515		461424
MAN1A1	P33908	277644	232885	444036	841737	737290	830778
MAN2A1	Q16706		106346	108017	160625	87796.9	157408
MAP2K1	Q02750				608216	3890000	352938
MAP2K2	P36507			77928.4	116195	100359	149154
MAPK1	P28482				463265	427567	535508
MAPK14	Q16539				300044	120213	226365
MARCO	Q9UEW3					119726	91820.5
MASP1	P48740	1490000	876057	1520000	3060000	3260000	3180000
MASP2	O00187	19500000	13000000	34100000	54100000	55700000	57100000
MBL2	P11226	214847	432380	198756	196799	133480
MBP	P02686	1440000	239319	1000000
MDH2	P40926					126165
MENT	Q9BUN1	257446	66228.3	423088	776052	422398	858678
MFAP4	P55083				159573	171334	136348
MGAT1	P26572	301205	236843	608355	2650000	1990000	2590000
MGAT5	Q09328				688294	586930	597205
MGLL	Q99685				70514.8	128108	72914.6
MGP	P08493	573562	382758	777982
MINPP1	Q9UNW1		280479	388839	2660000	2720000	2480000
MMP2	P08253	193976	188062	316606	543531	610025	539734
MMP3	P08254	133677	101036	201991	419119	519295	394229
MMP8	P22894				148338	198201	134134
MMP9	P14780	115182	151229	218231	608591	810297	645032
MMRN1	Q13201	2700000	3300000	5640000	1370000	967097	1720000
MMRN2	Q9H8L6	647089	301395	686384	4820000	4700000	5080000
MNDA	P41218			186778	704145	720997	869797
MPO	P05164	424452		374823	860390	676515	1020000
MPP1	Q00013	121727	72263.3	206932	129052		156196
MST1	P26927	228119	374140	171294
MTHFD1	P11586				392221	583804	513433
MUCL1	Q96DR8		293401		1360000
MYH9	P35579			113515		149052	83502.6
NAGLU	P54802				37786.8		70550.5
NAMPT	P43490	141388	113102	217209	580442	557411	767760
NAPA	P54920				1240000	1130000	1220000
NCCRP1	Q6ZVX7	160567			127201	68662.5	81003.3
NCF2	P19878			158149	281813	255884	391733
NCF4	Q15080				91216	101599	95404.4
NCL	P19338			108666		86778.9
NFS1	Q9Y697	1300000			805273
NID1	P14543					226621	252553
NIF3L1	Q9GZT8				773066	868633	810808
NOTCH3	Q9UM47	212331			243428	318012	286810
NOTUM	Q6P988				353415	258676	385526
NPEPPS	P55786				201381	246018	288598
NPL	Q9BXD5				229367	472967	271304
NPM1	P06748	122041				455483	74626.2
NPNT	Q6UXI9				686210	678180	800191
NSF	P46459				291135	276436	234321
NUP188	Q5SRE5	958664	1740000	1140000			550166
OAF	Q86UD1	2110000	476873	852801	7710000	8420000	8390000
OGN	P20774	80803.1	53432.4	78949.6
OLFM1	Q99784		148090		169974	442401	549178
OLFM2	O95897				183474	169384	199621
OPTN	Q96CV9					419727	213742
ORM1	P02763	9820000	36700000	6450000	3760000	2270000	2870000
ORM2	P19652	2590000	11500000	1490000	4330000	5130000	4390000
OSTF1	Q92882				117418	161994	126808
OXSR1	O95747	89262.7		262248	437463	450848	484869
P4HB	P07237	59843.9		152205	154599	207096	168554
PA2G4	Q9UQ80			23138.5
PAFAH1B2	P68402			127194
PARVB	Q9HBI1			99193.9	235957	166199	275287
PCBP1	Q15365	583705	387657	722606	334824	563598	439478
PCBP2	Q15366	138474		180884	187352	212056	151848
PCDH12	Q9NPG4			125264		233903	185702
PCOLCE	Q15113	612661	350548	905776	1300000	1360000	1490000
PCSK6	P29122				181468	118441	174147
PCSK9	Q8NBP7	467398	223066	581787	1940000	2840000	2410000
PCYOX1	Q9UHG3	4540000	1470000	4040000	13500000	11400000	12600000
PDCD10	Q9BUL8				284517	246833	294570
PDCD6	O75340	141713	55921.9	189348	1130000	1100000	1210000
PDGFA	P04085			401261
PDGFB	P01127	216820		558367
PDIA3	P30101					180551	78661.5
PDIA5	Q14554	295480		239235		338323
PDXP	Q96GD0				121140		108571
PF4	P02776	35100000	17500000	41000000	28800000	33600000	18200000
PF4V1	P10720	601098	502096	620616	714946	1200000	518398
PFKL	P17858				157330	131891	181392
PFKM	P08237					55989.8	71724.6
PFN1	P07737	598145	268005	521412		229524
PGD	P52209			150245	464302	395646	428023
PGK1	P00558	289464	113639	203769	296032	207059	260399
PGLYRP2	Q96PD5	5120000	4990000	6820000	12900000	19100000	14400000
PGM1	P36871			124747	440109	103325	331174
PGM2L1	Q6PCE3				326409	296503	327607
PHB1	P35232	399280		158440		220755
PHB2	Q99623	365508		248599		303027
PI16	Q6UXB8	61586.5	90390.4	60987.8
PIGR	P01833	483674	301968	300318	343006		214905
PIP	P12273	1030000	607524	395229	944676	446538	505319
PITPNA	Q00169				442263	415593	440807
PITPNB	P48739				384145	268633	364479
PKDCC	Q504Y2					126749	132514
PKLR	P30613				191698	257465	247839
PKM	P14618	580233	238165	615810	1420000	1710000	1520000
PKP1	Q13835	970262			226997	267169
PLA1A	Q53H76	73348.5	121161	106123	229722	250842	263662
PLA2G12B	Q9BX93					384117	354530
PLA2G7	Q13093	979700	159137	931294	3180000	2580000	3420000
PLG	P00747	11400000	13800000	10000000	14400000	11800000	14700000
PLIN1	O60240			117646		18835
PLIN3	O60664	293189	168284	311692	782904	878676	715048
PLP1	P60201	533086
PLS3	P13797				308013	123083	253699
PLTP	P55058	12900000	10300000	18300000	161000000	162000000	179000000
PLXDC1	Q8IUK5					140207	69235.9
PLXDC2	Q6UX71	33458.9	19964.5		67260.2	93843.2	80754
PNP	P00491	201682				205880
PNPLA8	Q9NP80	224401	413529	215487
POF1B	Q8WVV4	551937			405488	354115	386715
PON1	P27169	64700000	50600000	90200000	527000000	674000000	645000000
PON3	Q15166	39200000	22800000	43200000	237000000	228000000	246000000
POSTN	Q15063	276857	508916	507457	191053	175473	212900
POTEI	P0CG38		2710000		12800000		9780000
PPA1	Q15181					96094.6	78113.3
PPBP	P02775	3240000	3790000	4870000	1250000	745830	704951
PPIA	P62937	486005	191275	409254	64589.8	177349	61961.4
PPIB	P23284	164319	57953.1	160959		222354
PPME1	Q9Y570		21409.9	93604.8		107872
PPP2R1A	P30153	146427	91072.8	174230	905797	918005	908919
PRDX1	Q06830	744767	454089	868323	547024	662465	650815
PRDX2	P32119	1790000	1450000	2320000	2640000	2790000	2800000
PRDX5	P30044	25769.9	20767.7
PRDX6	P30041	5130000	6290000	9860000	3280000	4560000	3230000
PRG4	Q92954	1510000	3120000	6910000	978707	803062	1550000
PRH1	P02810	38145.7	73838.5	18677.2	82961.6
PROC	P04070	622837	642033	956021	498847	448086	561322
PROCR	Q9UNN8	166880		144118	769736	1020000	840198
PROS1	P07225	9370000	9870000	15000000	18100000	18000000	19100000
PROZ	P22891	526429	507932	430683			81483.2
PRPS1	P60891	189330	149725	421998	977263	1270000	949294
PRSS2	P07478				2450000	6080000	3620000
PRSS3	P35030	668910	400935	1160000	1360000		852548
PRSS3P2	Q8NHM4	213236		157648	1640000		221449
PRXL2A	Q9BRX8				81533.1	90711.4	131022
PSAP	P07602			135628	389487	201457	269069
PSMA1	P25786	317555	104170	204052	393159	528037	624829
PSMA3	P25788	57161.7				96041	160675
PSMA4	P25789	186624			232323	288523	208059
PSMA5	P28066	150685		120885	244671	342137	347947
PSMA6	P60900	76303.2	29970.3		46092.7	72382.7	83935.2
PSMA7	O14818					99159.4	136947
PSMB1	P20618				178344	274165	306418
PSMB2	P49721					158454	275897
PSMB6	P28072				246528	400079	389971
PSMD10	O75832				77309.3	169145	242562
PSMD5	Q16401				240674	245788	268824
PSME1	Q06323	222115	124905	271998	398085	198215	353373
PSME2	Q9UL46				435561	545542	428930
PSMF1	Q92530	425213	224246	502376	603904	894295	794682
PTBP1	P26599			73131.1
PTGDS	P41222	652739	555221
PTGES3	Q15185					97907
PTP4A2	Q12974				53689	21682.7	59428
PTPA	Q15257				207151	154093	173727
PYGB	P11216				74840.3	57120.9	48386.2
PZP	P20742		224359	204018		110520	145012
QSOX1	O00391	864237	540349	1540000	2570000	1940000	2750000
QSOX2	Q6ZRP7				336499	195853	29494.9
RAB10	P61026				206441	208723	176942
RAB1B	Q9H0U4					143226
RAB7A	P51149	216839		86314.8	111576
RAB8A	P61006	279032			51724.6	139073	36782.6
RAC1	P63000			605374	1280000	1180000	1020000
RAC2	P15153	770960	556824	1310000		592728
RAN	P62826	712850	378007	781347	3050000	3070000	3400000
RAP2B	P61225	40463.4		43890.5
RARRES2	Q99969	292124	207199	386987	1080000	1310000	1020000
RBM39	Q14498	149602		165858
RBP4	P02753	6980000	10600000	7870000	3440000	2240000	3980000
RFC1	P35251	248768	247846	241820
RHOA	P61586			105987	245721	206602	240420
RIC8A	Q9NPQ8				209678	268641	265812
RNASE4	P34096				229751	238180
RNH1	P13489				220418	265064	192194
RNPEP	Q9H4A4				349762	414945	338295
RPL11	P62913	229670	408325	100908	54680.7	188245	53479.6
RPL12	P30050	168560		152961	367920	307441	315112
RPL13	P26373	135833		96297.8
RPL38	P63173			328470		83687.9
RPS10	P46783	132465	63044.4	169443	138972	232042	134534
RPS13	P62277	311068		231228		184245
RPS14	P62263	25166.3		39435.9		31722.3
RPS15A	P62244			131080		171253	102525
RPS16	P62249	147829	20405.6	65664.1		80335.3	43563.9
RPS18	P62269	115849		162012		76448
RPS19	P39019	360868		380563	318685	465819	352073
RPS25	P62851	169835	52135.9	156597
RPS3	P23396	212448				117095
RPS9	P46781	237495	31481.9	117839		121233
S100A11	P31949				178273	74680.5	476319
S100A14	Q9HCY8	310029			213151	158260
S100A4	P26447		200464		342618	373744	349888
S100A6	P06703		507949	208196	456033	508885	920206
S100A7	P31151	1250000	403066	264545	1500000	1350000	40800000
S100A8	P05109	4550000	1580000	2050000	3930000	5320000	25500000
S100A9	P06702	4790000	1080000	1230000	1090000	1510000	25500000
SAA1	P0DJI8	5620000	4240000	7660000	9460000	9640000	7060000
SAA2	P0DJI9	1830000	1390000	2600000	3310000	2910000	2360000
SAA4	P35542	215000000	68300000	221000000	144000000	169000000	131000000
SAE1	Q9UBE0				3280000	4570000	2930000
SAR1A	Q9NR31				121030	122283	152011
SBSN	Q6UWP8	236108	106906	205487	278103	512570	111714
SCGB3A1	Q96QR1				376720	298252	201435
SEC14L4	Q9UDX3				636175	404426	688535
SELENBP1	Q13228	949046
SELENOP	P49908	2060000	1790000	2420000	9930000	9190000	10600000
SELL	P14151	886262	469823	889306	2220000	2090000	2620000
SELP	P16109		26255.9	74191.5	163190	160047	150159
SEMG1	P04279						1690000
SEMG2	Q02383						521451
SERPINA1	P01009	125000000	152000000	107000000	62400000	53200000	49400000
SERPINA10	Q9UK55	1920000	1590000	2920000	55800000	50200000	63400000
SERPINA11	Q86U17	161580	142674	188032	1100000	824940	1110000
SERPINA12	Q8IW75	157118		42674.8	237604	269821	106761
SERPINA3	P01011	24200000	29700000	18400000	12400000	10100000	11500000
SERPINA4	P29622	5880000	4450000	5680000	165000000	142000000	171000000
SERPINA5	P05154	891258	724836	839405	641685	474888	698429
SERPINA6	P08185	4010000	4370000	2640000	2110000	1550000	1940000
SERPINA7	P05543	1750000	2310000	1250000	1710000	1460000	1930000
SERPINB12	Q96P63	808244		152950	869221	986932
SERPINB3	P29508	264017				173102	609653
SERPINB7	O75635					30865.3
SERPINC1	P01008	11900000	14400000	6930000	6180000	5660000	6270000
SERPIND1	P05546	18400000	16300000	31800000	7440000	6050000	8010000
SERPINE1	P05121	107989	120797	205785	263808	162882	236650
SERPINE2	P07093	183706	144667	378065	518869	461415	539225
SERPINF1	P36955	2360000	2110000	1630000	3510000	3770000	3440000
SERPINF2	P08697	10700000	12900000	12500000	5880000	6180000	6030000
SERPING1	P05155	30600000	33400000	28700000	29800000	27700000	30800000
SFTPB	P07988	253310		546130	617189	438442	401167
SH3GLB2	Q9NR46	26974.8		39622	64773.8	73795.7	112220
SHBG	P04278	2170000	1640000	3450000	12500000	20900000	15000000
SIL1	Q9H173		17879.6		82092.5	113293	75796.4
SLC2A1	P11166	215311	342562	252882	189022	149858	784502
SLC4A1	P02730	707426	1500000	1140000	1020000	689821	3360000
SMPD1	P17405				932891	984696	1020000
SNCA	P37840	1570000	771343	2830000	2190000	3290000	2450000
SNED1	Q8TER0					114932	131662
SOD3	P08294		36135.1	26184.4		42157.7	52161.6
SPARC	P09486	183198	123305	167585	139768	156147	177235
SPARCL1	Q14515			181953	836152	951710	865798
SPON2	Q9BUD6	126573	78839.3	130373	239163	184991	244847
SPP2	Q13103	1820000	1000000	3700000	3450000	4480000	3540000
SPTA1	P02549	47999.6	108551	85789.4		36830	190339
SPTB	P11277	129155	134897	134930	107710	76977.1	295147
SRGN	P10124	103984		399885
ST3GAL1	Q11201					101173	194773
ST3GAL6	Q9Y274	193425	157172	223017	1700000	1300000	1840000
ST6GAL1	P15907		488115	569948	785467	913944	823151
ST6GALNAC1	Q9NSC7				144741	155472	152323
STIP1	P31948				169855	278075	178899
STOM	P27105	264967	124560	235946	103261	67587.5	234812
STXBP2	Q15833				148109	81281.6	148758
SVEP1	Q4LDE5				133992	106350	125510
SYK	P43405					272396	186030
TALDO1	P37837					477912	476369
TCN2	P20062				213257	309486	255387
TCP1	P17987	123806		152825	201855	640250	219311
TF	P02787	155000000	175000000	89200000	41300000	25200000	36600000
TFPI	P10646	651658	187289	740214	504152	675465	609141
TFRC	P02786	555474	688325	692027	1980000	1940000	2100000
TGFBI	Q15582	975743	966197	1190000	2160000	1830000	2380000
TGM1	P22735					291044
TGM3	Q08188	1250000	227388	145510	469004	889874	209833
THBS1	P07996	5580000	3020000	6590000	5850000	7270000	6550000
THBS4	P35443	281128	1430000	489013	3970000	4310000	4410000
TIMP1	P01033			136474	66335.1	143832	103529
TIMP3	P35625	398182	240387	486819	305429		254614
TKFC	Q3LXA3				65896.6		47887.3
TKT	P29401	126282	58475.2	29438.6	256103	297434	206100
TLN1	Q9Y490	260589	238382	410977	672289	705812	721796
TMOD2	Q9NZR1				169970
TPI1	P60174	56103.9			143082	222864
TPM3	P06753						252550
TRAP1	Q12931	656038		386002			507804
TRHDE	Q9UKU6				399563	393054	472534
TSKU	Q8WUA8	2250000	1330000	2300000	1720000	2820000	2020000
TTR	P02766	15700000	12400000	10400000	10800000	15700000	8160000
TUBA4A	P68366	1740000	571522	813216	2090000	893684	1510000
TUBB	P07437	821530		472293	1290000	814093	760973
TUBB2A	Q13885	349694				275313	391524
TUBB4A	P04350	1150000	394123	490002	1610000	472384	707821
TUBB4B	P68371	629849		456270	510882	440700	421996
TUBB6	Q9BUF5	726017			1160000
TUFM	P49411	542603				92198.8
TXN	P10599	926845			539757	706248	558706
TYMP	P19971	68329.9		58527.2	146453	156510	350818
UBE2N	P61088	25915.9				60779.2
UGT2B7	P16662				244630	204062	315313
UQCRC1	P31930	319806	119777	107451	411546	155704	218984
USP14	P54578				512213	511360	578691
VASN	Q6EMK4		218677	89923.2
VAT1	Q99536			314978	2310000	1970000	2130000
VCAM1	P19320		87247.2	104411	738740	803944	729812
VCL	P18206	209819	64549.1	130144	987495	812471	1170000
VDAC1	P21796	435797		206487	143660	166670
VIM	P08670	853900	526605	552637	1220000	568870	1110000
VPS4B	O75351				203225
VTN	P04004	82600000	57200000	80500000	61700000	53900000	74200000
VWF	P04275	686873	302611	741497	382514	379754	464066
WARS1	P23381				529265	877847	529146
XPO1	O14980					78701.2	104125
YARS1	P54577	47766.5			221752	153410	237769
YKT6	O15498	227780	140596	245043	349460	275431	381319
YOD1	Q5VVQ6			48242	98834.5	156856	111250
YWHAB	P31946	197463			149480	97698.8	145321
YWHAE	P62258	285366		104877		278139	148496
YWHAZ	P63104	405151	160493	279901	321298	512832	400358

## Sheet: Table S4
Tab Name	Description
Table S4	Clinical information of samples used in the discovery cohort
Column Name	Description
HC	Healthy control
CRC	Colorectal cancer patients
Polyp	Polyp patients
Characteristics	Patient’s age and gender information
Characteristics	HC	CRC	Polyp
Male	4	4	6
Female	7	7	2
Age(years) Median(min-max)	50(25-68)	53(31-59)	56(40-72)

## Sheet: Table S5
Tab Name	Description
Table S5	Label free quantification of 826 EV proteins across all 30 samples using DIA-MS
Column Name	Description
Genes	Gene names corresponding to quantified proteins
UniProt ID	UniProt ID corresponding to quantified proteins
C1-C11	The numbers for colorectal cancer patients
H1-H11	The numbers for healthy volunteers
P1-P8	The numbers for polyp patients
Genes	UniProt ID	C1	C2	C3	C4	C5	C6	C7	C8	C9	C10	C11	H1	H2	H3	H4	H5	H6	H7	H8	H9	H10	H11	P1	P2	P3	P4	P5	P6	P7	P8
A1BG	P04217	3840000	3190000	4040000	3080000	5710000	4700000	5650000	3740000	3010000	3450000	4060000	14400000	2200000	2480000	3860000	4360000	3000000	2660000	3560000	3170000	3150000	2830000	3290000	5030000	4730000	3740000	2400000	2840000	2840000	3720000
A2M	P01023	10400000	11000000	6250000	6040000	12200000	11000000	7410000	10900000	22500000	11000000	12200000	14800000	8740000	9760000	12300000	13400000	14100000	16000000	15800000	20500000	11800000	22100000	10200000	16900000	12600000	12200000	9890000	9820000	8770000	15000000
A4GALT	Q9NPC4	127119	125225	175217	133809	166835	89534.7	94089.4	198388	151339	178896	89534.7	154097	232902	184798	305716	227078	176030	233154	169573	212315	224537	152627	244964	219081	229808	212791	211669	280429	67787.2	292368
ABCB9	Q9NP78	2790000	4020000	1730000	2130000	1730000	2630000	2290000	3090000	1730000	2940000	1730000	3780000	2740000	3110000	2100000	2100000	2530000	3070000	2280000	2790000	3060000	2330000	2380000	1800000	1860000	3770000	1790000	1790000	3570000	2640000
ABI3BP	Q7Z7G0	298555	211607	309914	241203	187414	177932	241570	204581	142129	134647	131271	303675	310389	311802	121103	196361	206072	278955	235009	121103	151067	121103	318722	215519	280257	357937	206873	248150	206873	206873
ACTA2;ACTG2	P62736;P63267;P68032	940669	904205	372841	600902	337395	337395	722715	399111	572521	637590	665959	388441	552225	489438	302372	302372	316045	538494	322255	302372	432637	411310	635829	509512	1100000	177935	177935	324966	271183	548333
ACTB	P60709;P62736;P63261;P63267;P68032;P68133;A5A3E0;Q6S8J3;P0CG38;P0CG39	9030000	9270000	8440000	6980000	14900000	7840000	12600000	10300000	10400000	9740000	8360000	8120000	6410000	7370000	4830000	7160000	6260000	9320000	6600000	4440000	9370000	6340000	8260000	7590000	18100000	6250000	3920000	8210000	6680000	5310000
ADA2	Q9NZK5	11500000	9020000	12400000	6280000	9060000	9130000	8090000	10500000	5990000	6130000	8670000	17100000	12500000	6850000	3580000	9350000	12200000	9330000	18300000	8780000	6930000	7770000	4380000	4480000	8050000	10400000	5670000	6490000	1640000	1640000
ADAMDEC1	O15204	65147.7	179990	132888	65147.7	92272.7	142103	171077	117049	65147.7	93902.6	65147.7	178424	367516	184289	92743.4	125055	143180	143705	152517	92743.4	200622	92743.4	237210	253581	114616	196079	114616	221444	176573	440106
ADAMTS13	Q76LX8	6490000	4410000	5880000	5880000	3770000	5870000	3560000	4770000	5500000	5310000	3430000	5110000	4570000	5130000	2780000	4840000	4140000	7200000	4990000	5420000	4550000	5290000	4690000	2920000	4390000	5820000	6390000	4140000	5850000	3750000
ADAMTS8	Q9UP79	161475	259712	99850.2	43235.6	136274	59470.8	53856.8	90855	76005.6	199255	43235.6	192960	200128	206569	69167.3	109490	163435	275556	278514	100497	232212	69167.3	180464	171010	216244	208774	71911.2	264144	71911.2	117623
ADAMTSL2	Q86TH1	1600000	1100000	1960000	1280000	983965	1230000	1980000	1720000	1570000	1300000	2390000	1110000	1430000	1220000	343669	1410000	1320000	1750000	1330000	834657	902116	1140000	1600000	1860000	1670000	1030000	1350000	1030000	1680000	870120
ADGRA3	Q8IWK6	464332	345595	154063	527124	154063	398026	154063	154063	230118	154063	154063	281943	464128	520435	585041	387537	281943	281943	281943	281943	281943	362041	359483	342084	401444	730896	389548	442260	256750	310519
ADGRF5	Q8IZF2	1490000	1150000	1200000	846029	1030000	1150000	793827	1370000	1320000	886451	855414	1300000	1150000	1250000	1920000	608870	1180000	1290000	875735	869787	670420	903420	998201	1110000	970746	1030000	982055	1020000	1030000	1070000
ADGRG6	Q86SQ4	1930000	1370000	1850000	2300000	1380000	2580000	1660000	2490000	1550000	2120000	1630000	1510000	1560000	777135	1300000	1710000	1290000	1150000	1560000	1260000	1520000	1480000	2050000	1530000	1690000	1850000	751049	2400000	2540000	3200000
ADGRL4	Q9HBW9	1200000	882655	670123	500963	653402	606779	525499	510783	849279	927514	348145	729293	593338	707716	287920	297460	826063	743775	567342	694502	319233	592385	683746	496224	442144	1250000	552949	520457	846327	569329
ADH1A	P07327	194048	188457	127847	43244.2	43244.2	73949.6	643891	123336	79097.7	43244.2	43244.2	97290.4	386716	73231.4	172885	124749	220975	90179.5	114885	94135.9	84714.7	73231.4	63872.8	243696	144494	25033.8	371575	117258	25033.8	73605.4
ADH1B	P00325	951965	1020000	850302	497020	498839	630692	628352	620379	324033	902999	308232	492709	2740000	962091	1640000	1250000	1130000	656202	853489	403564	745751	333553	1070000	1760000	1170000	370772	3930000	1050000	1150000	370772
ADH4	P08319	2460000	1390000	1820000	1660000	1930000	1940000	1270000	1730000	593503	3340000	492116	733433	7320000	1240000	2760000	3070000	1420000	728842	1670000	922831	1370000	574649	3550000	7920000	5490000	1670000	15800000	2960000	3080000	2700000
ADH5	P11766	82349.8	924363	82349.8	82349.8	82349.8	82349.8	82349.8	823035	82349.8	84332.5	82349.8	167308	336111	167308	1400000	185025	354730	167308	167308	167308	360380	167308	102441	158796	79778.9	79778.9	346938	112864	79778.9	206779
ADIPOQ	Q15848	325563	410674	164334	322934	339167	329921	306437	384670	443250	164334	353446	347994	121741	456351	220645	363103	332759	462105	490918	334203	374341	583452	199538	211846	370577	443554	280917	510804	287551	341570
AFM	P43652	35800000	30300000	41200000	39100000	24300000	36000000	23100000	43600000	33500000	41200000	16900000	28300000	50400000	41800000	21200000	37000000	34800000	45900000	34000000	31600000	31800000	33400000	37400000	37900000	52600000	31800000	32800000	37100000	32800000	49000000
AGT	P01019	54400000	64900000	67800000	56200000	83400000	84300000	49300000	46900000	76700000	74300000	44300000	50600000	63500000	45800000	68000000	52400000	49900000	107000000	82500000	56300000	61000000	46800000	85100000	36300000	54200000	66500000	96200000	39800000	34200000	50700000
AHSG	P02765	40900000	49700000	34400000	71100000	41800000	68600000	25200000	31300000	30800000	30900000	31300000	37000000	54100000	48000000	70300000	51300000	39400000	72400000	42000000	56700000	40400000	33000000	32800000	54800000	44900000	43000000	30200000	74600000	33900000	70100000
AHSP	Q9NZD4	98134.4	183602	135296	247704	80685.6	96411	81836.3	80685.6	80685.6	219822	80685.6	561284	1710000	399315	107040	180222	225794	301116	284049	266238	716924	497092	181448	121522	129998	204948	295141	138417	965294	177065
AK1	P00568	249303	249303	249303	249303	249303	249303	336161	249303	249303	249303	249303	758859	346537	353646	264606	395173	508358	261402	433848	324723	452047	346243	331709	494425	292225	355865	565817	181373	262219	129295
ALB	P02768	2840000000	3210000000	2790000000	3000000000	2310000000	2350000000	2660000000	2620000000	3260000000	3380000000	1910000000	3480000000	3540000000	3620000000	1680000000	2920000000	3370000000	3450000000	3330000000	3690000000	3760000000	4120000000	3850000000	3600000000	3400000000	2910000000	2840000000	3370000000	3210000000	3440000000
ALDH1A1	P00352	406932	470144	301350	676711	475151	520707	556053	333145	179404	526725	180929	1280000	1280000	610953	921836	631789	740530	480153	1010000	366850	1160000	390107	775088	1220000	1010000	445459	1610000	433877	574981	275387
ALDOA	P04075	956938	1140000	189203	215213	846188	289424	277997	219524	523225	245385	197652	548901	529318	613870	148621	148621	148621	262050	411205	238262	284216	148621	1040000	529785	503386	276589	195133	195133	195133	195133
ALDOB	P05062	912587	827161	690269	797016	969328	883270	827999	1120000	782959	1830000	605258	736923	1660000	926031	723420	881163	673418	936774	888111	770969	2190000	1210000	1320000	1150000	1010000	931723	1920000	923699	958372	897106
ALPL	P05186	456579	83618.7	74453.3	28103.7	217620	135344	123819	81381.2	28103.7	796220	944277	81752.8	180257	330153	440204	380843	199265	204088	81752.8	81752.8	575135	1330000	285978	111989	448154	77910.6	45645.7	45645.7	45645.7	700433
AMBP	P02760	52100000	57900000	55500000	57600000	52500000	48000000	52700000	59300000	41600000	55300000	29100000	43700000	58400000	60500000	34100000	57300000	50900000	59100000	56400000	61600000	69400000	47800000	47600000	62500000	57900000	52400000	44300000	54600000	34600000	47800000
ANGPTL3	Q9Y5C1	5450000	6490000	5690000	4410000	5390000	5260000	5630000	6830000	4860000	5330000	3680000	4760000	3090000	7550000	2500000	7600000	4350000	5420000	6210000	5260000	3820000	4980000	4740000	4110000	5150000	9810000	6200000	8590000	4090000	4170000
ANGPTL4	Q9BY76	98424.8	179573	229054	229284	26190.8	26190.8	57432.4	168886	79495	122682	113873	154211	58071.5	58071.5	58071.5	66454.3	58071.5	58071.5	89991.5	107317	58071.5	58071.5	47664.1	51620.3	93841.3	66951.8	47664.1	113875	47664.1	47664.1
ANGPTL6	Q8NI99	8050000	6230000	4210000	4420000	4610000	4390000	3390000	5480000	5840000	5210000	6030000	7690000	4570000	6440000	2990000	6910000	5580000	5800000	6060000	6330000	4720000	6500000	5790000	3420000	6080000	6020000	4800000	6540000	6340000	3800000
ANGPTL8	Q6UXH0	314255	379710	350919	91707.9	407497	407489	91707.9	627176	688843	895335	91707.9	581580	555102	716961	792929	418730	766593	226527	245966	226527	379482	272992	1270000	1500000	402935	507272	980237	1690000	1290000	978133
ANK1	P16157	126204	197257	126204	126204	126204	126204	126204	126204	126204	126204	126204	309071	224231	112937	131600	84006	111746	84006	84006	84006	129695	93902.3	32801	315646	262512	24576.4	24576.4	32385.8	24576.4	24576.4
ANPEP	P15144	503180	210710	368015	325025	1120000	210710	347981	229318	321266	278142	1650000	393117	349478	874530	198317	383473	545217	237257	855890	306722	374175	240539	549890	864585	371975	856807	418424	446844	407892	406522
ANTXR1	Q9H6X2	4090000	3530000	2630000	3210000	3220000	2440000	2000000	3160000	4070000	3550000	2170000	5320000	4040000	7350000	9740000	6300000	8880000	7390000	8570000	4710000	4760000	4480000	4650000	4030000	4540000	8940000	4170000	7440000	3830000	6990000
ANTXR2	P58335	2820000	2470000	1990000	1980000	2520000	1430000	1930000	2480000	3550000	3760000	2250000	5250000	3730000	6060000	7310000	4400000	6610000	5720000	9150000	4500000	5410000	3550000	4590000	2850000	3550000	8350000	4870000	5880000	3290000	5440000
ANXA1	P04083	326792	118361	12573.6	76930.6	217328	46279.6	68084.5	54254.2	12573.6	12573.6	12573.6	252398	203525	141107	41066.1	123796	204061	41066.1	123998	41066.1	100179	67910.3	314530	103176	214171	45832.5	97226	40543.5	40543.5	40543.5
ANXA2	A6NMY6;P07355	3710000	211129	185221	122911	1440000	134259	97977.4	88717.3	177767	80147.4	77696.4	313913	545078	335512	349202	162946	206455	72495	131829	234184	234076	139700	1760000	484352	777039	148203	121416	131956	121416	232902
APCS	P02743	1430000	1950000	2290000	2150000	1810000	1920000	1910000	1450000	1820000	1740000	1720000	1350000	1290000	1210000	1100000	1140000	905438	1090000	1150000	1320000	1740000	1450000	1450000	1360000	1570000	953094	1330000	1240000	1020000	1050000
APLP1	P51693	143242	251107	128704	85029.4	141351	248060	116930	143152	331907	145146	82111.9	150130	249037	164846	95395.2	200419	66497.3	266802	197264	179792	80049.5	268773	215172	193362	278125	382796	20630.2	257659	57383.4	47393.5
APLP2	Q06481	355723	31440.4	126539	318998	233974	475878	325863	293410	31440.4	42391.9	212670	132375	241507	38965.2	38965.2	98678.1	38965.2	144167	184804	38965.2	101704	38965.2	10	10	10	10	10	10	10	10
APMAP	Q9HDC9	25300000	27500000	48200000	41800000	33200000	20500000	56000000	33100000	21500000	20900000	41300000	21500000	34700000	31200000	22900000	37600000	27600000	15900000	47800000	28800000	28500000	24200000	25200000	22600000	23100000	39000000	35400000	25000000	28500000	21900000
APOA1	P02647	2400000000	2460000000	1770000000	1960000000	3390000000	2140000000	1480000000	1620000000	1680000000	1630000000	1480000000	1970000000	3200000000	3070000000	5440000000	3240000000	2800000000	3060000000	2830000000	2790000000	1930000000	2680000000	3150000000	2600000000	2030000000	3920000000	3690000000	3990000000	1770000000	4330000000
APOA2	P02652	185000000	255000000	172000000	316000000	285000000	227000000	162000000	177000000	259000000	400000000	188000000	195000000	357000000	350000000	497000000	315000000	196000000	301000000	210000000	375000000	334000000	311000000	296000000	421000000	361000000	384000000	442000000	401000000	358000000	248000000
APOA4	P06727	166000000	115000000	176000000	78200000	311000000	195000000	192000000	196000000	97600000	136000000	136000000	301000000	618000000	547000000	666000000	454000000	365000000	312000000	499000000	538000000	498000000	427000000	597000000	573000000	155000000	739000000	589000000	685000000	216000000	777000000
APOA5	Q6Q788	9750000	23400000	24800000	25100000	26100000	10500000	7340000	9080000	18600000	15800000	8260000	8810000	12500000	8600000	31300000	12000000	8060000	7350000	12900000	12100000	16800000	18200000	6700000	5550000	7680000	10000000	18600000	9630000	12900000	10200000
APOB	P04114	141000000	181000000	189000000	303000000	238000000	155000000	135000000	212000000	386000000	592000000	446000000	164000000	120000000	114000000	181000000	192000000	133000000	91500000	245000000	366000000	436000000	389000000	124000000	152000000	179000000	151000000	396000000	133000000	419000000	532000000
APOC1	P02654	85800000	84400000	72800000	176000000	149000000	130000000	59600000	99700000	52700000	72800000	53700000	74000000	117000000	117000000	369000000	151000000	104000000	76800000	151000000	88800000	108000000	78200000	73800000	135000000	93500000	152000000	350000000	197000000	71800000	117000000
APOC2	P02655	60000000	66800000	49600000	110000000	75400000	83300000	45500000	83800000	39100000	41700000	36500000	40800000	74900000	46800000	96700000	69100000	55100000	52800000	64800000	33600000	44900000	36500000	52500000	49700000	37600000	49300000	134000000	69800000	73700000	40900000
APOC3	P02656	331000000	398000000	224000000	514000000	460000000	462000000	194000000	254000000	344000000	334000000	184000000	214000000	727000000	395000000	612000000	528000000	329000000	365000000	409000000	399000000	412000000	306000000	666000000	392000000	313000000	291000000	776000000	480000000	494000000	373000000
APOC4	P55056	2290000	2350000	1830000	3210000	3710000	2750000	1240000	3870000	1650000	1330000	1080000	2020000	1990000	1690000	5900000	2540000	1850000	2500000	2490000	1750000	2980000	1790000	1320000	1000000	1100000	1670000	3550000	1330000	1130000	861865
APOD	P05090	1080000000	1080000000	1030000000	1320000000	906000000	1060000000	976000000	1210000000	1110000000	957000000	696000000	1410000000	903000000	1210000000	847000000	848000000	1000000000	1290000000	893000000	768000000	1260000000	1340000000	1550000000	1100000000	1000000000	1290000000	947000000	1700000000	1330000000	1650000000
APOE	P02649	351000000	479000000	310000000	1030000000	802000000	578000000	194000000	539000000	347000000	808000000	363000000	330000000	654000000	708000000	2380000000	487000000	512000000	695000000	440000000	537000000	547000000	513000000	575000000	484000000	385000000	854000000	1950000000	488000000	253000000	344000000
APOF	Q13790	4190000	5690000	5400000	5910000	6380000	3980000	4110000	4640000	4320000	4700000	4590000	3740000	1790000	3290000	3990000	3490000	3060000	2910000	4620000	5430000	5710000	4920000	4600000	4290000	3180000	5250000	7280000	6080000	4520000	5880000
APOH	P02749	1490000	1800000	1140000	1050000	1640000	1690000	1550000	1260000	1540000	1320000	1480000	907743	1710000	1210000	2780000	1510000	1510000	1470000	1020000	2190000	2040000	1940000	1900000	2010000	1450000	2130000	946378	1920000	2680000	3030000
APOL1	O14791	180000000	176000000	200000000	207000000	176000000	168000000	78100000	207000000	153000000	117000000	107000000	174000000	227000000	228000000	242000000	145000000	93700000	170000000	154000000	213000000	179000000	211000000	129000000	183000000	115000000	212000000	285000000	167000000	166000000	127000000
APOL2	Q9BQE5	138845	119449	193178	131617	91320	88197	46457.5	156223	128827	103623	64282.6	149484	123609	144536	173141	84151.8	84151.8	184811	88257.6	205013	127154	183722	160026	127372	71845.6	122867	263032	117654	71845.6	71845.6
APOM	O95445	27700000	31200000	23700000	30800000	39800000	35500000	24200000	28100000	21500000	16700000	16600000	34100000	25900000	33900000	43500000	32400000	24900000	32800000	28600000	28200000	24100000	26700000	19100000	30500000	23200000	42400000	39400000	41200000	28800000	51500000
APP	P05067	706229	132219	172066	418754	262594	420757	823856	370770	82699.6	87040.6	382269	219913	160166	136445	83561.4	278567	99458.8	184123	83561.4	83561.4	89089	83561.4	94885.7	104511	94885.7	94885.7	94885.7	178905	128870	242701
APRT	P07741	148194	148194	184960	228463	148194	148194	148194	148194	148194	148194	148194	759183	632817	422262	228338	339654	489177	162165	546935	162165	221163	162165	88220.6	510904	264389	88220.6	545039	219452	88220.6	88220.6
AQR	O60306	466629	453345	1260000	869687	275637	512878	855103	565393	1020000	813760	825990	595525	80153.6	80153.6	178671	375058	229853	527950	433301	371378	761361	450291	492456	284837	761748	284837	284837	284837	2470000	2030000
ARF1	P84077	2750000	2560000	2690000	4990000	2290000	3340000	4220000	2360000	1790000	3290000	1860000	10200000	6540000	6240000	6440000	5080000	7490000	3800000	6550000	5630000	7980000	8690000	3740000	8060000	6850000	3250000	8930000	4370000	7450000	3850000
ARF4	P18085	292170	170554	138023	380338	278444	335575	692498	138601	109984	139300	151905	567797	402536	207793	343175	412390	355215	138692	349494	161215	265347	359080	248809	274703	1160000	164329	372080	318716	164329	175445
ARF5	P84085	183850	183936	114050	247200	245721	140225	185422	116799	114050	138502	114050	569259	686153	348105	381338	243399	580256	150936	252179	129678	307772	340436	262552	378561	532787	196745	328407	268250	341971	221564
ARG1	P05089	46236.7	46236.7	237617	58063.4	1490000	50066.1	79165.1	120850	85318	46236.7	92594.3	724728	140106	140106	233080	218355	255868	320226	211208	179352	171074	242444	135015	197738	924294	135015	170268	168541	135015	135015
ARSB	P15848	34500000	22100000	25400000	27500000	42500000	27200000	24900000	26600000	22700000	19300000	19300000	30800000	44400000	43500000	65500000	41300000	57600000	34100000	23800000	37800000	22000000	28900000	63000000	13200000	28600000	77300000	61400000	66100000	13200000	23400000
ART4	Q93070	256248	284367	281954	278510	430141	284033	358532	262719	266877	267730	649476	194312	287244	1160000	127957	329545	645350	127957	305281	232859	376899	127957	300788	310656	312160	2840000	284655	209172	157734	139418
ASAH1	Q13510	553309	600203	541215	805698	534330	616326	851094	660629	809021	1050000	1070000	516901	510807	531158	350270	588237	411532	645439	516613	1250000	820796	585046	515178	360815	830215	269529	473388	482031	148611	687360
ASGR2	P07307	1410000	869259	1020000	968192	1140000	669363	847668	508871	1110000	1520000	1740000	1030000	617475	935881	439238	690675	535946	977434	810209	1030000	1160000	1400000	1210000	1020000	1110000	888501	684120	555538	2000000	1530000
ASPN	Q9BXN1	1850000	2840000	2570000	2050000	2880000	2310000	1530000	1880000	3480000	2160000	2350000	2000000	3970000	4510000	3200000	3200000	4090000	4100000	4260000	3300000	2670000	2610000	3150000	3330000	2700000	3600000	2330000	6570000	2940000	5020000
ATG3	Q9NT62	127086	127086	127086	241405	127086	127086	127086	127086	127086	127086	127086	506795	75574.9	341917	75574.9	75574.9	346660	218584	206273	338819	757502	797743	112948	366136	112948	112948	148519	159362	307361	112948
ATP5F1A	P25705	460336	237491	269940	486142	497981	335635	205973	290717	575004	781182	661401	551058	486562	449018	830342	395736	402077	269136	375003	703558	1030000	889701	606281	623082	349874	610456	638439	501874	349874	349874
ATP5F1B	P06576	1590000	540507	691546	1150000	1160000	625225	631630	774527	1330000	1110000	978053	997361	906546	670268	1740000	844648	892763	662955	935116	1210000	1790000	1270000	1130000	766520	815607	1910000	1140000	1130000	305222	395117
ATRN	O75882	1240000	1180000	1430000	1190000	997920	1210000	899591	1730000	1750000	1360000	876398	1160000	1260000	1210000	470361	1300000	1450000	1880000	1150000	1300000	1460000	1030000	1210000	1150000	1630000	1140000	940145	806717	1200000	802022
AZGP1	P25311	257643	226326	277006	425385	823132	284333	333163	291103	314806	495093	306711	216292	512168	275336	765037	567674	373080	199459	282855	318563	333289	245658	322437	565669	333851	394935	275116	377280	307138	203220
B2M	P61769	25867.3	55013.2	25867.3	25867.3	25867.3	25867.3	25867.3	110413	87223.7	25867.3	25867.3	92209.2	233400	277548	175721	44949.8	31772.3	386401	31772.3	31772.3	31772.3	97104.1	139596	9153.73	9153.73	274547	115143	113657	30434.7	40661.8
B3GNT7	Q8NFL0	174577	97381.2	171192	158186	114846	299857	222582	204448	115507	95572.8	98471.9	102560	141006	91435.2	187779	161250	379298	169358	199636	80804.2	151430	96214.3	166287	205764	174538	351198	319754	265156	130766	207464
B4GALT1	P15291	112217	112708	135886	465105	136555	550522	210669	196388	86641.9	59580.7	146279	158915	225889	231350	439956	206541	194270	138854	142207	127165	225478	89702.9	158755	377803	153690	380023	102983	593711	24479.3	225936
BCHE	P06276	3330000	3390000	4740000	5630000	3430000	2630000	2060000	3930000	3810000	8700000	3350000	4360000	14900000	11200000	14300000	6690000	6430000	12400000	5350000	15900000	20200000	9650000	9360000	3830000	8170000	13200000	16700000	3050000	17200000	43900000
BGN	P21810	86022.1	95717.3	36092.8	64983.5	123250	60845.5	68164.8	52144.2	90478.3	115533	126081	69110.1	69110.1	76206.3	69110.1	69110.1	69110.1	73259.9	79024.4	97708	117704	107096	43933.5	147040	17483.8	59784.5	65455.1	156117	17483.8	79821.3
BLVRB	P30043	2050000	3770000	2460000	4560000	1980000	2710000	5510000	2750000	1530000	3020000	1250000	11600000	7310000	8200000	4350000	6570000	8240000	5430000	12000000	5310000	8070000	6600000	3410000	9450000	3980000	3950000	6630000	4330000	5690000	2220000
BMP1	P13497	1580000	1380000	1920000	1660000	1160000	1130000	1220000	1380000	1410000	1340000	996586	1580000	1630000	1490000	826765	1500000	1380000	1460000	1410000	1340000	1550000	1550000	2020000	1330000	1980000	925788	1440000	1040000	1460000	1230000
BNC2	Q6ZN30	109000000	151000000	95200000	132000000	141000000	110000000	77700000	69700000	63000000	109000000	55000000	91700000	143000000	88800000	45800000	89500000	75200000	76900000	72000000	89200000	94400000	71600000	157000000	113000000	87000000	152000000	104000000	111000000	141000000	191000000
BPI	P17213	88354	88354	88354	115207	132685	88354	88354	88354	88354	88354	88354	40713.9	134167	40713.9	149606	55206.1	155309	41842.8	40713.9	40713.9	127199	157172	10	10	10	10	10	10	10	10
BPIFB1	Q8TDL5	6420000	3450000	4850000	3050000	7930000	4130000	2840000	4560000	4780000	3830000	6270000	3820000	4000000	3670000	4820000	9070000	3780000	5700000	5890000	4500000	4340000	2460000	6000000	4880000	3040000	7190000	14300000	7420000	4130000	11000000
BPNT2	Q9NX62	13831.7	13831.7	21296.5	13831.7	13831.7	13831.7	13831.7	37935.8	13831.7	16744.4	13831.7	18469.3	18469.3	40983.8	51326.4	47307.2	25559.7	47639.7	18469.3	22814.2	25399.5	43624.3	10730	10730	10730	70799.8	17933.4	10730	10730	10730
BSG	P35613	1370000	209283	114597	110175	143724	132026	110175	110175	110175	110175	110175	363086	287094	129506	280053	92707.9	125617	165891	227016	92707.9	92707.9	92707.9	1130000	407127	91234.5	159213	91234.5	91234.5	91234.5	107931
C1QA	P02745	8120000	3810000	3100000	2020000	3560000	4760000	5940000	4370000	3520000	2710000	4120000	4660000	2920000	3400000	4000000	3700000	3270000	3680000	3690000	4230000	3250000	3090000	2790000	4170000	2820000	2800000	2320000	3750000	2450000	2770000
C1QB	P02746	8310000	5980000	3960000	4980000	5590000	5610000	5640000	6130000	6080000	3840000	8940000	2560000	3190000	4770000	5350000	4730000	3320000	4540000	5180000	6200000	3700000	5100000	3280000	7710000	3990000	3490000	2930000	3180000	3390000	4550000
C1QC	P02747	2500000	2620000	1540000	1930000	2480000	2400000	2990000	2830000	2080000	2180000	2250000	1530000	2350000	2370000	2690000	2300000	1640000	2500000	2000000	2730000	2450000	2010000	2360000	3840000	1920000	1330000	1740000	2030000	1570000	2010000
C1R	P00736	343000000	464000000	392000000	434000000	354000000	356000000	456000000	326000000	359000000	338000000	357000000	272000000	296000000	358000000	173000000	342000000	259000000	301000000	312000000	291000000	276000000	306000000	388000000	352000000	417000000	325000000	327000000	353000000	389000000	352000000
C1RL	Q9NZP8	64700000	75800000	69000000	52800000	67900000	75200000	80800000	56200000	50200000	78400000	42300000	45600000	31400000	57200000	37400000	64800000	37200000	66800000	50700000	40800000	55900000	51600000	62800000	43100000	75900000	46100000	45700000	25100000	54600000	50700000
C1S	P09871	216000000	235000000	232000000	192000000	161000000	206000000	250000000	206000000	131000000	167000000	180000000	132000000	147000000	159000000	42100000	181000000	148000000	193000000	153000000	138000000	158000000	117000000	136000000	134000000	175000000	101000000	125000000	103000000	171000000	94300000
C2	P06681	5260000	7270000	5730000	5970000	8180000	7320000	9140000	5660000	5710000	6550000	7750000	4300000	5760000	5240000	3500000	5620000	4490000	6000000	6170000	5670000	5410000	5100000	5920000	5280000	5540000	5400000	5930000	5250000	5320000	6050000
C3	P01024	14600000	16300000	17000000	18500000	20800000	21100000	19000000	16700000	12300000	14400000	19000000	14800000	15300000	13900000	30000000	12900000	14500000	14300000	14700000	22600000	16600000	13400000	15500000	24900000	14500000	17400000	17600000	19100000	14900000	18000000
C4A	P0C0L4	4820000	4930000	7310000	4430000	4840000	5110000	2160000	2910000	1440000	2760000	5130000	2730000	6960000	3620000	3350000	3540000	3660000	2390000	2020000	2440000	3190000	2540000	2470000	4220000	1420000	3700000	1120000	4110000	2510000	4140000
C4BPA	P04003	17500000	33300000	21900000	17300000	18500000	20200000	23700000	21100000	21200000	22800000	22300000	17700000	18500000	12400000	19000000	15700000	13500000	14100000	23600000	25200000	18200000	21400000	16000000	19300000	16800000	16400000	17800000	25000000	18500000	18500000
C4BPB	P20851	493238	744153	612018	436570	690244	596574	873964	562528	465918	468023	471728	619389	812281	514303	913413	556155	723754	370990	608487	639521	478803	482022	604879	646356	588103	841211	557478	761058	531858	689427
C4B_2	P0C0L4;P0C0L5	15400000	23700000	19200000	13400000	10800000	11100000	22500000	15800000	7920000	14800000	17600000	11400000	17100000	8390000	10900000	9110000	7620000	12400000	7960000	14700000	10200000	13300000	7230000	13000000	8470000	10100000	5750000	15700000	10000000	18000000
C5	P01031	5960000	9060000	9560000	10100000	8400000	8940000	12400000	7790000	8790000	7370000	8060000	6070000	7520000	5530000	5680000	5830000	4950000	5380000	6470000	6070000	7930000	6140000	5690000	6120000	7650000	6560000	8130000	8240000	4860000	5960000
C6	P13671	728061	1100000	798118	714248	943656	887948	753364	841316	799143	717319	689817	605915	715173	747119	916976	710070	699032	665336	854035	937561	601766	719146	657320	866308	680344	816299	546369	763281	669629	611840
C7	P10643	63100000	55000000	55000000	38300000	65700000	74200000	85000000	65100000	81100000	88300000	121000000	57400000	57300000	69900000	29100000	69300000	60800000	96000000	71800000	51400000	47600000	98800000	61200000	62700000	68600000	46300000	58300000	47100000	85700000	62800000
C8A	P07357	999802	2060000	2270000	1670000	1970000	2260000	2210000	2150000	1740000	1480000	1910000	749170	671914	1300000	643515	957081	1130000	1080000	1500000	1990000	1150000	888143	862525	853143	1240000	1850000	665190	712167	1410000	1640000
C8B	P07358	1290000	2440000	930524	2990000	1170000	3100000	1260000	752375	802129	650097	1080000	910958	1120000	1220000	1450000	925055	808380	911628	1240000	1480000	789568	833867	791835	979110	742142	1330000	822947	2600000	665061	1200000
C8G	P07360	666490	942089	1760000	1370000	2540000	1750000	1250000	1850000	1740000	1680000	1150000	647659	482385	856628	737455	848096	537803	1290000	1020000	562459	1040000	1140000	1000000	1180000	953329	354692	678290	1190000	1530000	1830000
C9	P02748	13200000	17900000	22000000	22000000	18500000	30300000	22400000	12400000	14000000	9920000	13200000	8400000	7190000	15000000	12200000	13700000	11700000	15100000	14200000	12300000	12300000	9450000	10600000	27400000	11200000	19400000	22700000	21800000	7600000	16500000
CA1	P00915	12213	12213	12213	12213	12213	12213	79203.4	12213	12213	81874.6	12213	489396	184283	138952	322530	129881	214300	52472.2	160723	145223	167203	52472.2	142885	1100000	251767	85196.2	106411	107364	85196.2	85196.2
CA6	P23280	1310000	1070000	894280	1250000	690239	543921	1200000	1160000	1080000	1340000	477200	1620000	802449	1370000	2450000	786320	1900000	1700000	759323	1830000	1810000	1820000	1440000	1680000	922743	2860000	1020000	1760000	1920000	1790000
CAB39	Q9Y376	149213	149213	149213	310319	149213	149213	422656	4070000	149213	281693	207406	1200000	451578	359411	564810	249581	1510000	231139	2040000	231139	1190000	946886	153624	3010000	362400	153624	153624	2790000	256267	153624
CALML5	Q9NZT1	485309	285666	748621	3270000	10400000	553801	335733	608980	679365	285666	534438	1090000	602311	1300000	1670000	1190000	699488	1060000	576392	609489	567213	440989	566225	857824	2360000	1100000	1200000	924713	566225	566225
CALR	P27797	584602	355512	274836	178428	178428	178428	178428	178428	386997	274928	449625	1540000	1040000	513059	163265	406521	163265	306549	279637	163265	1190000	163265	741615	505736	283327	270031	270031	270031	270031	270031
CAMP	P49913	1730000	2010000	2270000	2070000	3730000	2640000	1100000	1460000	1010000	1040000	1480000	900046	1860000	2490000	12000000	1730000	2820000	2660000	5010000	3180000	4250000	2200000	1850000	2390000	1750000	5640000	4640000	2900000	1410000	3010000
CAND1	Q86VP6	359578	611988	756353	790721	662636	738349	946907	611177	615681	888412	581099	1550000	1290000	1040000	959599	955759	1070000	876845	1150000	1090000	1800000	1340000	707312	1080000	944746	615289	1450000	922079	1310000	575147
CAPN1	P07384	1430000	2060000	1890000	2860000	3720000	2220000	2540000	2120000	1590000	2110000	2340000	5570000	3360000	3180000	2990000	2840000	3810000	2080000	3390000	2030000	3960000	3830000	2370000	3160000	3660000	1910000	3350000	2460000	3680000	1410000
CAPN2	P17655	322811	328342	320851	373153	389843	478212	387285	661459	552881	464347	372323	367661	537909	459336	232348	572882	553626	489390	582164	275217	560633	306981	358006	334218	533941	336524	238345	599541	304699	331633
CAPNS1	P04632;Q96L46	1040000	1290000	1430000	1320000	1780000	1810000	1520000	1530000	1180000	974878	1370000	2460000	1750000	1670000	992678	1640000	2360000	1360000	1960000	788735	1880000	1560000	1430000	1530000	1680000	1130000	1350000	1550000	1710000	764344
CASP8	Q14790	199510	476291	472984	422653	353307	106316	405351	539505	500018	730474	355883	379462	332250	343094	203626	304586	348079	389400	357030	408251	718873	605798	403116	389715	199733	324568	235145	223323	133327	133327
CCAR1	Q8IX12	833523	833523	1780000	1350000	833523	833523	981137	1220000	1880000	2260000	2310000	2170000	1090000	1070000	1110000	1360000	1480000	2290000	1530000	2020000	1880000	2240000	669615	504192	1610000	1560000	600266	1320000	51052.1	64315.6
CCDC126	Q96EE4	254981	170515	108371	249820	189236	172840	158578	237829	183468	260796	109101	133247	260842	189015	108926	258869	194338	127769	156065	271888	166497	230368	329523	246913	296884	317224	184847	213696	107066	140375
CCDC71L	Q8N9Z2	4150000	4150000	4150000	4150000	8140000	6470000	5540000	6210000	4150000	4150000	6990000	9960000	15100000	14900000	23000000	1600000	13600000	9180000	19000000	18000000	14200000	16000000	19500000	13800000	3890000	35700000	32200000	19900000	6060000	15500000
CCT2	P78371	1130000	374735	542903	372367	100201	259890	379565	100201	100201	221446	100201	892601	767041	558363	737813	385957	440586	434884	404098	333581	573842	669221	809609	999183	338075	299118	469030	482431	800357	299118
CCT3	P49368	284826	509311	190400	505679	136596	136596	276292	136596	136596	257078	147908	1040000	731668	564729	1160000	572729	452521	494718	544655	448485	943044	790536	313904	1620000	437650	246398	666145	455797	626052	236953
CCT4	P50991	556886	285892	262878	658219	330583	197112	366040	248261	134819	300898	134819	1450000	1060000	819842	1610000	799289	822256	572338	636445	589594	890067	857070	435338	1750000	688221	675490	916666	743292	577027	330751
CCT5	P48643	270216	195772	222460	488838	66058	196390	338197	87727.3	66058	193166	110949	1180000	749316	750198	1190000	760155	791998	510215	502460	451275	814756	962705	522179	1470000	584682	474257	722752	665332	544369	222038
CCT6A	P40227	970093	658415	252535	586427	224139	240879	317242	146240	151889	260172	179125	1690000	1050000	875501	2120000	877075	847345	677644	693224	686763	1060000	1010000	651339	2070000	623538	516429	781834	826251	711554	208614
CCT6B	Q92526	45004.2	45004.2	45004.2	106844	45004.2	45004.2	45004.2	45004.2	45004.2	45004.2	45004.2	352327	136226	169544	396805	185883	165936	135935	135935	135935	232234	222642	106215	534507	109540	106215	152380	115578	106215	106215
CCT7	Q99832	2510000	1030000	854768	709621	740130	270735	388918	738093	351123	270735	323196	1680000	1440000	1050000	2300000	694110	895367	988107	849785	905006	1380000	1360000	2110000	1560000	680454	639857	1400000	1210000	1090000	974925
CCT8	P50990	335544	496583	146873	657375	87214.3	188085	318117	94042.8	87214.3	221520	233955	1470000	917455	824742	1760000	642119	772448	615902	639281	650081	1210000	1240000	480286	2010000	545786	549798	944476	682163	790261	249423
CD14	P08571	6300000	6710000	5260000	11600000	9590000	16800000	4080000	4580000	4480000	4060000	4170000	4670000	5960000	7670000	9200000	6870000	4770000	6590000	6640000	4030000	3550000	2540000	9010000	11300000	3570000	9410000	6760000	10800000	2950000	9310000
CD209	Q9H2X3;Q9NNX6	2810000	1360000	2110000	1600000	3080000	1700000	2640000	2520000	1350000	907251	1780000	1990000	2540000	2620000	1990000	1730000	3620000	1570000	2840000	922396	1870000	970603	3970000	2590000	2030000	5480000	2960000	2290000	1080000	3210000
CD248	Q9HCU0	98673.8	53260.7	100550	86470.4	51188.2	51188.2	97717.9	99362.3	142162	132219	51416.4	94644.6	153927	180890	243035	256718	223387	249167	236430	110288	195574	77006.6	119769	148669	176548	286913	102592	579831	108922	116927
CD44	P16070	424247	65653.2	147862	126431	83681.2	82361.5	87469.9	65653.2	106570	225777	65653.2	175868	105783	269412	142916	172337	199873	277322	254342	115484	213960	105783	227648	67927.3	103580	222262	67927.3	126171	102485	97414.7
CD5L	O43866	8360000	14400000	8010000	6060000	32400000	17100000	9310000	55200000	16000000	13900000	13600000	8180000	12700000	20100000	37200000	10500000	17500000	33700000	22100000	15900000	7180000	10200000	11000000	9590000	18100000	8640000	15400000	9050000	20800000	25400000
CD99	P14209	55594.3	27444.6	60268.6	27444.6	27444.6	27444.6	27444.6	27444.6	27444.6	41048.5	27444.6	124782	36165.1	32058.6	115997	75826.8	156745	32058.6	58929.2	97667.8	131879	81334.7	92091.8	122675	49637.8	49637.8	91535.6	49637.8	49637.8	49637.8
CDC37	Q16543	104797	73424	107498	201381	73424	73424	100981	99263.9	73424	144736	173442	342325	67209.8	189976	67209.8	105312	197105	111814	140416	155294	272583	171823	148395	217788	125880	160359	83766	62897.3	89829.5	62897.3
CDC42	P60953	292212	102834	1130000	742821	102834	102834	762138	102834	102834	142807	102834	436797	727629	235233	247532	139005	419994	156263	180881	139005	804915	160912	178053	367129	523795	68722	232067	605182	152789	68722
CDH1	P12830	1800000	1120000	1650000	1130000	1040000	1170000	1820000	933562	1760000	1770000	2440000	934320	1170000	1100000	696035	1160000	905667	2260000	882252	1370000	1160000	1570000	2080000	914928	1240000	867908	1070000	1060000	1440000	847407
CDH11	P55287	1220000	705781	806447	682991	646128	1010000	954059	665992	847369	875463	902124	750250	484254	864045	516478	860243	906500	1060000	728453	1040000	789531	1370000	677700	838490	647470	528323	367685	513308	668557	647653
CDH13	P55290	1140000	551422	823456	232661	811770	602924	681544	481215	881707	927100	699798	769369	715798	522654	335461	491847	429246	1620000	357774	441981	639633	635816	652700	710899	404228	223273	181914	327094	999124	725279
CDH15	P55291	300497	83817.6	249558	812902	83817.6	83817.6	163426	223089	242514	345615	118256	413852	259058	241338	161359	257299	161359	337140	307608	200731	262095	216388	462356	324323	419801	70414.5	1220000	289074	155800	70414.5
CDH18	Q13634	335316	1270000	788467	998184	643349	499298	1510000	335316	1430000	831503	991317	270067	270067	270067	270067	695814	270067	463718	688129	492655	660666	438739	514035	514035	514035	514035	514035	514035	514035	660328
CDH19	Q9H159	215891	128928	128928	128928	128928	128928	197651	267871	240905	128928	128928	435414	136918	152796	136918	136918	233569	303316	136918	170783	239243	365356	128508	128508	715613	190999	128508	128508	180030	128508
CDH2	P19022	742053	420299	647192	629627	427412	440790	653491	603457	430836	482678	799918	341107	357548	224684	254386	400239	339103	550405	419104	372503	539813	266237	504164	642106	537751	518782	576798	483457	681029	453403
CDH5	P33151	26900000	12500000	18200000	12800000	13000000	12600000	20200000	15400000	22100000	18100000	21400000	14800000	11300000	14000000	3410000	8700000	14200000	25300000	13600000	13700000	16600000	16500000	16400000	15400000	12900000	13200000	7560000	13100000	16700000	16500000
CDH6	P55285;Q9ULB4;Q9Y6N8	1090000	397811	794635	559186	471925	949314	787450	635682	880902	1040000	931013	718351	573828	863290	218097	554101	699112	1420000	635409	700148	898745	918328	743359	709292	655037	345087	443175	453594	977143	577981
CDHR2	Q9BYE9	192103	150340	288185	355007	269207	150340	377055	150340	150340	193059	824801	133258	133258	133258	133258	133258	133258	133258	133258	133258	197170	133258	517393	387998	642284	323268	287140	178531	519697	103736
CDHR5	Q9HBB8	942407	467368	907572	763359	269505	736195	926854	753227	318618	671419	502727	433942	528781	463889	291328	541359	291328	520123	352071	308008	725290	327901	373855	210657	522240	210657	272521	272788	686604	579150
CELA3A	P08861;P09093	61357.1	61357.1	61357.1	123940	61357.1	182006	208403	309662	99649.5	61357.1	61357.1	85639.8	34685.3	82643.4	34685.3	209987	156641	34685.3	196698	34685.3	34685.3	145152	195250	86081.3	72653.7	190950	72653.7	280918	92361.3	72653.7
CEMIP	Q8WUJ3	64765.3	62670.3	108588	62670.3	97268.6	62670.3	134303	131341	128488	85416.5	68618.6	119635	65990.9	86672.1	65990.9	108967	100908	138829	65990.9	95988.1	86328.8	82753.3	111549	88477.8	128036	92425.9	185833	192297	88477.8	216748
CEP192	Q8TEP8	62584.2	172665	137045	170534	62584.2	156326	276453	179482	112464	97857.4	62584.2	101124	96324.7	126590	84771.1	156749	137074	163897	90074.7	84771.1	96400.1	84771.1	260593	118026	159561	151695	98514	90484.9	90484.9	90484.9
CES1	P23141	124097	187552	112210	390630	215739	240368	83848.6	83848.6	250952	285322	83848.6	89006.5	561565	89006.5	151813	89006.5	171490	138447	89006.5	131186	158678	89006.5	94340.5	60499.7	228870	60499.7	621106	60499.7	129456	60499.7
CES2	O00748	299727	587932	503592	430584	366999	512579	478821	525346	534660	437274	361641	503137	802691	395595	367292	548209	357274	575695	361949	667559	669316	588667	557352	541225	469493	890618	556574	554341	332669	370720
CETP	P11597	102000000	70700000	51100000	121000000	156000000	105000000	75500000	91200000	116000000	124000000	111000000	90800000	63300000	135000000	77100000	97400000	93800000	142000000	124000000	173000000	126000000	200000000	51300000	53100000	110000000	133000000	144000000	91700000	57300000	92900000
CFB	P00751	6980000	7850000	8920000	6080000	9650000	7770000	12900000	9540000	5570000	6220000	7230000	6080000	5050000	5660000	5660000	4580000	5710000	4120000	5640000	7750000	5780000	4250000	6800000	10000000	7370000	5100000	5940000	5410000	6400000	6380000
CFD	P00746	2560000	1570000	3100000	1630000	2440000	1980000	2620000	1670000	1850000	3490000	1310000	1540000	1330000	2130000	944710	1710000	1660000	2140000	2180000	1750000	1980000	1530000	1740000	1480000	2230000	1160000	1010000	858430	2240000	2520000
CFH	P08603	23800000	19200000	32200000	14200000	9960000	21700000	32500000	21100000	26100000	28100000	25100000	15400000	11400000	11300000	5460000	10600000	8730000	14100000	9560000	16200000	19500000	16600000	16400000	12100000	19500000	6560000	7600000	7050000	17300000	8570000
CFHR1	P36980;Q03591	3560000	2870000	4650000	2640000	2710000	2280000	6990000	3150000	6670000	6330000	7220000	1820000	1640000	824149	2370000	1550000	1790000	2540000	1710000	1790000	5250000	4680000	3640000	2780000	3040000	719282	1610000	1930000	4160000	3230000
CFHR2	P36980	417161	273563	1050000	273563	274919	387795	1780000	690155	375549	554505	665866	181804	307129	466243	250547	298323	181804	467097	181804	412288	948810	926242	802833	807090	379288	322540	441000	322540	336587	820571
CFHR4	Q02985;Q92496	858542	991337	3870000	1290000	1650000	1000000	5370000	1850000	1520000	1060000	1710000	830175	365427	1020000	697474	704433	1810000	972526	569319	1090000	1610000	1850000	1450000	1460000	1150000	1150000	1010000	862822	919118	888039
CFHR5	Q9BXR6	653864	1210000	2130000	1020000	1090000	1040000	1620000	927689	1130000	845623	1350000	812610	588003	542252	974480	713354	489053	724255	730391	1060000	942658	854025	1090000	797844	700926	776303	529195	1040000	1110000	1020000
CFI	P05156	1470000	1790000	1690000	1350000	1880000	1870000	2090000	1510000	1130000	1350000	1210000	1310000	1320000	1110000	1800000	1660000	1550000	1600000	1760000	1380000	1130000	1070000	1170000	1380000	1450000	1210000	1180000	1290000	1250000	1440000
CFL1	P23528	559617	399537	245680	626360	408474	341504	569969	305453	245680	326256	245680	1520000	844082	838067	888088	795498	1740000	655267	722381	509510	1040000	774044	474035	816731	1070000	280161	376263	311757	613412	478426
CHGA	P10645	1990000	1530000	1030000	1370000	477791	1280000	1790000	1220000	1170000	1880000	1680000	1280000	920255	852627	350581	1370000	985424	1690000	1480000	1690000	6680000	1360000	7810000	2720000	1100000	963204	803153	2290000	1300000	1560000
CHMP1B	Q7LBR1	37902.8	283083	193816	187108	37902.8	37902.8	95179.5	77601.8	37902.8	113197	37902.8	368895	362154	237527	196302	290798	419397	142453	249409	214355	236890	145838	71800.9	410787	71800.9	113408	341050	119250	108045	71800.9
CHMP2A	O43633	78933.8	78933.8	99482.8	78933.8	78933.8	78933.8	78933.8	78933.8	78933.8	120396	78933.8	374359	447169	162170	164980	166914	297964	162170	222339	162170	263832	164511	102256	425178	102256	102256	115768	102256	121606	102256
CHST12	Q9NRB3	650487	245007	443264	602154	444089	737065	522673	757400	523115	386866	491639	622035	666620	676869	640290	528333	453930	549358	632518	583610	579700	498591	664686	582578	606296	696176	599048	773175	332319	621026
CHST14	Q8NCH0	256896	232966	201706	306583	334743	250637	249827	269036	216906	207389	549251	194157	253222	293717	253361	237688	221325	248256	292541	303417	191586	327136	210610	211987	134137	251127	370319	328958	165663	277147
CIDEB	Q9UHD4	160363	278597	160363	339403	294339	184100	160363	258480	492405	313132	326607	147361	365483	182176	463051	313321	241648	101888	277617	337386	331318	367691	388505	299640	299640	790810	544100	319505	363653	303434
CLASP2	O75122	195746	99347.5	214230	384400	99347.5	213267	207904	99347.5	325602	532614	235433	216862	933614	374462	216862	216862	216862	227320	271389	380812	603174	395652	393200	128810	128810	229385	288347	134750	559338	653646
CLEC11A	Q9Y240	1210000	980918	865483	725174	676884	897962	1250000	928775	668893	637145	752554	680044	684391	1020000	388247	944828	1050000	953059	1080000	765007	908470	1090000	906383	1390000	1080000	994520	594691	993949	559062	773879
CLEC3B	P05452	2470000	1010000	1470000	851804	1040000	832403	1360000	1090000	1410000	1470000	1560000	1420000	927187	1860000	1080000	1980000	1940000	3580000	1620000	831842	2360000	1510000	1680000	1690000	1190000	995431	1150000	828441	1380000	1370000
CLIC1	O00299	241437	150695	237135	381598	474294	150695	409290	155841	167297	153370	150695	561170	712885	352996	528944	343588	819485	343588	482086	343588	520048	343588	110466	512906	262953	110466	384073	110466	110466	110466
CLIP1	P30622	180669	431079	277541	267530	180669	275754	289363	281957	204638	183485	230018	163719	215216	286738	143844	204495	191213	220199	145860	130843	139211	142051	97062.3	94738.9	292456	187351	44432	155255	7247.2	174584
CLSTN1	O94985	1460000	691437	1020000	642693	808570	1340000	923442	1290000	929352	1060000	841308	1330000	743074	882294	539843	929548	1120000	1060000	850117	823285	849203	1160000	660111	728197	879847	789439	536776	809540	803735	548348
CLU	P10909	438000000	524000000	388000000	495000000	580000000	554000000	402000000	334000000	342000000	507000000	315000000	409000000	482000000	382000000	211000000	445000000	316000000	371000000	366000000	456000000	419000000	490000000	585000000	462000000	420000000	564000000	392000000	416000000	497000000	671000000
CNDP1	Q96KN2	31800000	41200000	36000000	38000000	25700000	34800000	12600000	34500000	8140000	20300000	12100000	25800000	57600000	32800000	28900000	51700000	47300000	43100000	27000000	35900000	34500000	30500000	40700000	19700000	29900000	23000000	31400000	30600000	47400000	32900000
COASY	Q13057	10	10	10	10	10	10	10	10	10	10	10	221684	141554	99298.6	45955.4	45955.4	45955.4	45955.4	86722.3	79087.5	180566	126394	35121.5	149569	42104.1	35121.5	35121.5	35121.5	93757.3	35121.5
COL12A1	Q99715	2100000	1490000	3110000	1710000	5140000	1380000	1570000	952527	2470000	6550000	2050000	665176	1880000	376833	112425	112425	354425	150802	162975	3340000	1730000	112425	115272	350159	1600000	2600000	115272	2650000	115272	115272
COL18A1	P39060	402697	100889	100889	139199	267008	368927	213839	100889	513781	460724	230282	447075	108323	324291	215833	382261	133171	317583	325687	411151	258400	512696	89381.1	84618.6	299446	270984	121264	84618.6	347433	470778
COL6A1	P12109	142426	90842.5	90842.5	90926.3	90842.5	187243	109853	100068	90842.5	122936	117233	137823	57523.8	62448.8	91152.8	106361	141171	192415	77354.2	101570	114387	182713	69622.9	69622.9	166185	94738.7	69622.9	86364.1	121188	122370
COL6A3	P12111	761618	527382	583477	534604	826442	510847	675262	434974	627439	486749	506260	830809	597676	743869	778383	864711	1110000	1260000	833298	569188	622567	528049	1230000	1260000	759171	1220000	1080000	1890000	333182	555325
COLEC10	Q9Y6Z7	14700000	11100000	14200000	13100000	9970000	11600000	10200000	14300000	12200000	10000000	14000000	17800000	13000000	13500000	8580000	16700000	17000000	15400000	15900000	14600000	12800000	11800000	16900000	14400000	12600000	18200000	11700000	16800000	8390000	6870000
COLEC11	Q9BWP8	7430000	5460000	4740000	4940000	4450000	3800000	3980000	4180000	6390000	5080000	5540000	6010000	3830000	5610000	2750000	6020000	6090000	6400000	5630000	5230000	5780000	4090000	6530000	5480000	4270000	4240000	3450000	4800000	7740000	6510000
COMP	P49747	237557	114990	160727	114990	114990	320186	114990	122953	207541	198591	114990	241767	145183	690960	297253	216024	493797	392647	328367	139597	327902	139597	276131	276131	319284	349173	276131	550081	501661	557452
COPS2	P61201	24215.8	24215.8	24215.8	24215.8	24215.8	24215.8	43568	24215.8	24215.8	24215.8	24215.8	150608	73871.8	60350	66908.6	103874	65202.3	72412.2	78872.5	60350	113827	60350	35454.8	147175	25795.9	25795.9	70354.5	25795.9	83122.5	25795.9
CP	P00450	4510000	4760000	5920000	4340000	6320000	5660000	5390000	4820000	5990000	4130000	13700000	4360000	3600000	4740000	3380000	3890000	4800000	4950000	5370000	6670000	6290000	4890000	3460000	5570000	3460000	3520000	2500000	4340000	3610000	5560000
CPA3	P11509	521668	1390000	521668	1010000	1860000	1120000	640732	781526	616692	521668	1030000	1360000	1230000	1290000	928548	716090	917717	880014	1090000	843295	583019	1230000	158618	158618	158618	1490000	857252	869061	158618	158618
CPB2	Q96IY4	15300000	35500000	20400000	29100000	40600000	32500000	17000000	24200000	22500000	28700000	20200000	20900000	26400000	17900000	17400000	18400000	23600000	27400000	28100000	26900000	15600000	25600000	15100000	22500000	13600000	27500000	20600000	13700000	15100000	21300000
CPN1	P15169	2330000	4950000	2320000	2960000	2420000	2720000	2140000	2560000	1700000	2340000	2310000	2740000	1800000	1520000	2090000	2370000	1800000	2170000	2200000	2130000	1700000	1690000	1420000	1630000	2540000	2080000	1250000	1710000	1640000	980822
CPN2	P22792	3750000	4630000	5250000	5500000	5350000	3810000	4070000	3090000	2310000	3790000	4240000	5240000	4560000	4520000	4450000	5370000	3010000	5180000	4800000	4090000	4110000	4590000	6420000	2700000	4440000	4550000	4020000	3830000	7320000	3030000
CPQ	Q9Y646	480781	631774	445976	411155	507101	651807	571922	546045	366010	604960	212815	521554	623321	715211	760386	641949	709259	720775	772414	569891	519201	416191	749152	570396	500621	1040000	503214	659372	153131	311656
CPS1	P31327	768046	707817	525273	188644	644358	203210	303659	342426	179286	1260000	398640	826718	1020000	464826	475975	1030000	675037	872114	951795	307478	1530000	307478	866769	2310000	431060	803366	4280000	387226	169832	431856
CPXM1	Q96SM3	576881	154117	240596	689731	569120	762384	589761	393120	154117	154117	309506	673609	173877	390531	173877	173877	173877	173877	173877	173877	228989	173877	450171	450171	450171	450171	450171	450171	450171	450171
CRP	P02741	205399	572375	5940000	1110000	539797	1020000	2590000	506553	346161	205906	2310000	133877	133877	133877	410141	133877	133877	133877	133877	133877	202950	133877	168146	155179	777437	329822	120276	120276	298032	371454
CRTAC1	Q9NQ79	7650000	7670000	4350000	4470000	4890000	4330000	4810000	5400000	8440000	9120000	5240000	5690000	4690000	8090000	3470000	6330000	8630000	8870000	9300000	3080000	9320000	5870000	6520000	9110000	8440000	7890000	4050000	7910000	6800000	7670000
CSE1L	P55060	397017	397017	595620	866493	623100	552957	397017	397017	652813	1030000	694244	699441	477200	344029	1360000	536931	736682	259421	633258	905801	908026	822743	436105	678194	403378	907000	746763	257471	284070	257471
CST3	P01034	5810000	3950000	3380000	5820000	5090000	3820000	4470000	2900000	3620000	3090000	4340000	4490000	3200000	2590000	1670000	4140000	2110000	4590000	3820000	2850000	4230000	3560000	6860000	5740000	5970000	2830000	4690000	3510000	2270000	2540000
CTRC	Q99895	163280	436058	243944	97863.5	227923	359536	575761	262923	152951	41478.7	68151.9	290052	343822	386213	1060000	311393	400756	208991	370146	303258	152579	240037	267126	254159	291885	406943	254159	305918	254159	254159
CTSA	P10619	170508	144019	100092	152333	329338	478344	206677	76130.9	217134	249608	256202	135532	123977	146674	123977	123977	170874	221228	197676	197896	282547	178277	160049	147913	134081	86990.8	206483	145900	132989	433521
CTSB	P07858	516465	220538	271044	610965	180814	370315	386141	263516	283078	272586	811198	514140	403508	224895	224895	224895	225319	296270	224895	224895	297672	224895	686455	510956	446333	244375	244375	460171	244375	244375
CTSD	P07339	917813	574935	1110000	863511	996805	1050000	726343	951973	1210000	775400	1180000	492939	984158	666589	489856	798763	453874	689346	644861	610176	766541	531638	1170000	1110000	1180000	642817	1290000	846483	996828	992781
CTSF	Q9UBX1	1100000	1600000	703616	1180000	1400000	2050000	913762	873396	887252	2050000	640143	1160000	1480000	1350000	844482	1910000	1660000	1470000	1760000	1020000	1580000	1290000	1670000	1150000	1290000	1320000	1270000	1350000	800645	1180000
CTSG	P08311	1010000	1160000	850519	974828	690524	586000	1210000	1100000	773962	784903	1340000	1160000	832032	960098	756069	991482	1140000	634115	886064	1130000	754695	2060000	442149	984154	918952	1180000	549191	616194	719079	1230000
CTSK	P43235	16800000	19500000	9860000	6970000	3490000	1720000	3140000	2850000	4630000	4610000	17100000	11200000	9990000	13100000	3240000	4590000	4560000	2050000	8770000	13500000	8570000	9120000	7190000	2720000	4410000	2220000	1300000	3420000	573551	9690000
CUL3	Q13618	34661.3	88062.1	58889.6	105097	34661.3	53120.8	97684.8	95847.6	34661.3	50994.1	34661.3	287728	139167	121048	122751	135624	260208	61422.3	142214	69911.7	143192	85135.3	32988.3	208035	80974.9	49819.8	150483	20448.5	57560.8	20448.5
CXCL12	P48061	440132	158663	286509	582014	512424	391356	402496	639336	490335	533418	504765	201650	223692	289126	318605	203945	315089	298698	509475	623305	700252	439130	239902	464959	289894	489930	239902	409657	466100	1050000
DBH	P09172	134735	298411	309229	357516	193639	395237	630611	407105	280031	201943	560525	340304	180889	268123	30531.7	131059	488679	386457	30531.7	163476	274287	220246	217051	207933	221107	238595	186383	171837	200788	131470
DCD	P81605	343841	408831	1010000	619611	1840000	483335	309655	3240000	4240000	532816	1220000	3070000	774031	524331	2210000	5580000	449579	393383	632436	1680000	1080000	1090000	362887	918733	610982	566411	592809	2320000	731375	713335
DDI2	Q5TDH0	298059	443237	252662	614645	205204	283873	389187	205204	233226	496415	205204	1250000	621399	845047	636565	637177	731795	594004	720859	627525	1090000	1050000	331595	1280000	356047	236689	426398	236689	925184	324843
DDX3X;DDX3Y	O00571;O15523	159807	79440.5	118074	69409.7	180201	45817.6	113899	134330	22584.7	22584.7	22584.7	238798	259204	104143	145649	88071	248789	20752.9	33034.5	55612.9	32757.8	15141.3	104470	108675	60680	146273	186611	135260	60680	60680
DDX46	Q7L014	1330000	4460000	1790000	5130000	4140000	1900000	1590000	1400000	2560000	3970000	1770000	1630000	4960000	2030000	1000000	1920000	1060000	1840000	1310000	2970000	2820000	3090000	2800000	2850000	1740000	2890000	2290000	1410000	5990000	5410000
DDX55	Q8NHQ9	117971	178889	104585	32831.1	32831.1	121121	198042	32831.1	343146	385426	32831.1	107784	107784	176607	107784	107784	218568	107784	107784	107784	107784	382636	24829.9	24829.9	188381	239675	24829.9	122405	24829.9	24829.9
DEFA1B;DEFA3	P59665;P59666	1380000	660784	660784	1060000	1410000	911761	871353	896633	660784	660784	1050000	716318	876437	1850000	842923	1490000	2570000	716318	1180000	738308	716318	1640000	918226	1060000	2070000	918226	918226	1090000	918226	918226
DEFA4	P12838	266074	83409.3	246843	83409.3	83409.3	83409.3	379798	165332	83409.3	180719	83409.3	349779	135438	347530	374896	159981	135438	166519	371193	231087	211067	549075	61414.7	61414.7	61414.7	61414.7	61414.7	61414.7	61414.7	61414.7
DHX9	Q08211	722333	246916	293726	174356	82124.8	120181	82124.8	140034	82124.8	82124.8	82124.8	815025	680197	199962	222162	130019	228825	40377.6	40377.6	40377.6	40377.6	40377.6	634452	232373	115997	178463	103632	168964	103632	103632
DIPK2A	Q8NDZ4	618006	55747.9	166450	457436	195424	322490	360300	385612	77233.9	55747.9	347692	388598	328589	100969	116360	245133	235545	102284	100969	100969	180443	100969	269580	192424	91623.2	91623.2	91623.2	91623.2	91623.2	167690
DIPK2B	Q9H7Y0	72842.1	49440.2	44988.2	65432.8	73329.5	117931	44988.2	69798.4	67725.1	61902.2	44988.2	67318.1	59307.8	74286.9	59307.8	97337.9	134471	155331	101506	77328.5	85894.6	59307.8	64154.9	87696.2	69814	125561	46714.5	78579.7	46714.5	46714.5
DLST	P36957	496254	596553	456983	534758	586722	557239	514479	712473	410431	373320	352347	678816	713614	586701	1350000	579461	1000000	531892	754234	619649	539181	597645	705186	742758	577842	1410000	1200000	1270000	577842	577842
DMKN	Q6E0U4	184829	177635	70038.3	121869	666897	229546	387304	182024	52559.6	52559.6	52559.6	169656	129615	169238	248618	100925	180408	151216	158608	220280	142366	244221	179864	217903	194695	246804	198265	177090	93677.2	158195
DNAAF1	Q8NEP3	1280000	1940000	2540000	1290000	1230000	553584	742518	1340000	4460000	4280000	1450000	1820000	2860000	1380000	653709	1260000	1330000	1700000	2430000	4430000	4480000	3590000	3850000	3330000	1050000	1140000	1780000	1560000	940102	1360000
DNAJC3	Q13217	1270000	909386	1210000	1100000	795031	953603	921777	1170000	993778	827618	1090000	876779	663924	1230000	722756	1020000	917074	923763	806752	741148	775174	1030000	1070000	992690	938905	714612	944536	854898	716726	807657
DNM2	P50570	140226	287597	116032	225734	116032	232974	162860	127511	275690	207287	116032	455740	278851	377094	429972	232630	335739	199272	357777	237051	310861	365183	228344	306645	338009	140974	321336	175779	226398	140974
DPP4	P27487	361368	415539	299921	177858	203100	196443	299191	392991	338324	265047	173081	539768	547073	617305	421390	535320	641690	562659	656869	413893	443266	264293	714792	587174	386526	829662	670075	647902	295933	415254
DSC1	Q08554	76445.6	37992.4	86105.6	37992.4	3790000	115588	41748.8	153188	452151	57149.8	37992.4	385716	113489	52790.8	103927	259525	284987	208843	171259	52790.8	119310	142265	185791	134399	774685	103840	58361.4	150631	82732.4	58361.4
DSC2	Q02487	919244	399953	694166	496523	276830	325048	695782	408880	563456	470226	616130	225767	302860	398084	170469	295856	170469	485615	360173	341592	475557	573673	536504	400808	459763	223183	162145	131352	493609	131352
DSC3	Q14574	850580	672464	319573	397033	281588	496032	519448	281588	609763	562073	281588	501394	193080	193080	193080	256228	427812	488563	193080	615900	755418	890916	117936	489913	269385	146505	152684	319991	196609	117936
DSG1	Q02413	348404	203535	331166	266022	11200000	334346	203535	527893	420089	222384	434189	717087	289737	282268	331844	643721	553553	384642	514389	282268	481204	609419	176953	377018	3200000	324083	176953	330070	257236	176953
DSG2	Q14126	6660000	4770000	4790000	4240000	4390000	5260000	5010000	6240000	9240000	6520000	7370000	4910000	3220000	4650000	1810000	4310000	4510000	7620000	5310000	7450000	6130000	9470000	5160000	3300000	3400000	4740000	2230000	4130000	4050000	4130000
DSP	P15924	112150	112150	367531	313505	16300000	400059	330218	218233	291732	402160	343090	1040000	588588	308447	374914	417166	461639	565799	464603	314527	516244	546510	446434	481979	8700000	495295	223870	306118	232367	180556
ECH1	Q13011	112666	172767	574863	48164.8	48164.8	48164.8	48164.8	48164.8	48164.8	48164.8	48164.8	59049.4	233558	35193.8	165559	73159.6	205355	28967.5	28967.5	28967.5	52838.4	28967.5	76524.3	149438	23782	44947.9	190857	189007	23782	23782
ECM1	Q16610	1170000	594860	1100000	781117	672297	508954	740330	933506	816582	1270000	1430000	747631	320316	626792	528985	377045	293919	1130000	808326	842667	861125	933161	716482	546710	844159	588987	281925	492552	806606	619010
EEF1A1;EEF1A1P5	P68104;Q5VTE0	2180000	1240000	1360000	2960000	3190000	2120000	1780000	1370000	1450000	1600000	1380000	4540000	4850000	3270000	2790000	2120000	3940000	2230000	1900000	2410000	4860000	3710000	1940000	3600000	4970000	2070000	4170000	2120000	4020000	2030000
EEF1D	P29692	1540000	168547	168547	168547	168547	168547	192615	168547	168547	168547	168547	201029	544707	446468	281082	233211	78590.2	126879	78590.2	78590.2	157115	203878	831469	398560	130953	128126	128126	150778	175394	128126
EEF1G	P26641	553297	453426	382477	804342	501722	608850	699086	664017	261106	246397	712767	898419	758634	417112	929090	442192	611107	475481	390933	473742	382701	382701	566971	802887	658819	671155	775080	447364	494896	514571
EEF2	P13639	195701	146440	233123	188369	604526	236350	153603	178482	235614	158075	149076	262505	406642	216777	297913	233248	234142	156640	261430	265429	327916	250503	251692	360644	516650	368650	394014	335722	182305	100533
EFEMP1	Q12805	1230000	2760000	1020000	3460000	1320000	5550000	667104	733844	1000000	609082	1180000	1330000	1850000	2730000	2870000	1580000	1530000	1600000	2270000	1290000	1910000	976548	1560000	3940000	1600000	2790000	1180000	6440000	952822	8350000
EFEMP2	O95967	464945	452388	362213	378083	444696	390343	311727	321407	355019	305895	300766	413312	375775	320350	197230	526772	392101	588689	542553	240578	206072	315229	495761	621858	381493	346023	387895	499997	191715	232767
EFHD2	Q9BUP0;Q96C19	176307	155165	147371	211881	126932	165439	240083	176626	194870	145480	127652	274663	183717	221363	176694	212379	219908	181950	207144	176694	251290	241975	171568	129011	205010	166162	107279	92054.5	197037	92054.5
EFTUD2	Q15029	473100	1160000	283472	662570	2050000	311415	315760	220553	1010000	1450000	567882	327040	477731	1000000	209122	230133	163349	554587	777484	1120000	650824	1640000	317182	323177	165836	354962	480021	527190	1000000	1300000
EIF2S1	P05198	1150000	426737	426737	604169	2690000	439074	426737	426737	426737	426737	426737	1180000	680813	711604	633093	591904	707575	376672	551033	869915	824729	852426	392545	449759	765621	639207	489378	703929	223356	223356
EIF4A1	P60842;Q14240	394387	83597.3	58372.7	107372	355428	96257.9	98998.5	58372.7	93870.4	58372.7	58372.7	231962	200955	170952	161443	147080	287296	122520	223734	116078	200239	127809	157588	278505	238409	98733.9	166564	139753	75212.6	75212.6
EIF5A	P63241;Q9GZV4	535824	188394	237977	347260	93007.9	343581	401577	136830	79154.9	271755	109790	898437	372757	549908	607834	498512	566560	485130	402697	362804	589261	574062	288606	405812	623889	189034	126056	166468	417515	64874
ENO1	P06733;P09104;P13929	3380000	4260000	3390000	4040000	8070000	3010000	2580000	3550000	2480000	4430000	1580000	6240000	7750000	4550000	4800000	4100000	9490000	3360000	5670000	3590000	8620000	3210000	2690000	3650000	4260000	2070000	3560000	2560000	3280000	3560000
ENO2	P09104	98951.1	98951.1	105054	98951.1	166574	111390	98951.1	98951.1	343489	98951.1	98951.1	278996	158318	47402.6	122148	146240	343171	47402.6	152073	47402.6	148126	47402.6	10	10	10	10	10	10	10	10
ENO3	P09104;P13929	2640000	1350000	1020000	1540000	2170000	1200000	2870000	1350000	742346	1350000	494992	2790000	3750000	1800000	1850000	1140000	3270000	946535	1910000	1420000	2760000	973049	1610000	1200000	1250000	737709	2560000	785506	1200000	1490000
ENPP2	Q13822	2270000	2300000	2690000	1160000	2060000	2430000	2110000	2610000	2110000	1090000	894496	4780000	1650000	3370000	1090000	3100000	5900000	3530000	5050000	2250000	1580000	2740000	972396	664656	1050000	1100000	1110000	921985	708670	1100000
ENTPD5	O75356	393297	1000000	663102	490444	879886	618825	694546	851570	966792	1030000	314517	790976	818768	924297	992649	958081	816605	1160000	1140000	449375	1030000	755794	1260000	991726	889779	1520000	1220000	843092	513056	643864
EPPK1	P58107	757813	314218	386736	165226	321340	160189	160189	160189	160189	202224	160189	590218	1390000	410330	274501	179956	372269	179956	336785	179956	179956	179956	896246	323576	181939	303778	154018	154018	154018	378877
ERBB2	P04626	12700000	10400000	10100000	10500000	8540000	8290000	8660000	10900000	9230000	6930000	6930000	15600000	13600000	12900000	6390000	6390000	15200000	12500000	12600000	6390000	10100000	8300000	12800000	11400000	7210000	7210000	7210000	13700000	7550000	7210000
ERP44	Q9BS26	129393	140572	91653.8	105373	94251	125268	199772	134912	103011	75510.7	63201.5	96568.9	96426.5	132897	8396.22	102546	125546	100181	100097	103201	130004	109891	33382.9	81484.6	162698	118846	33382.9	79958.7	95168.9	33382.9
ETF1	P62495	326499	377936	255743	507123	311928	353532	635250	373034	255743	255743	264363	645339	804964	577005	588635	479200	671625	329257	583507	438825	435158	433388	705485	562039	629581	159529	620156	631636	358705	420082
EXOC8	Q8IYI6	4200000	4350000	2760000	2690000	3330000	2980000	3080000	4630000	2340000	3430000	1610000	3240000	3460000	3510000	2850000	3510000	2850000	2950000	3470000	3530000	3570000	3210000	2500000	3770000	4170000	3820000	2420000	4510000	2420000	2420000
F10	P00742	3800000	4400000	5820000	3080000	4340000	4760000	4100000	3630000	2840000	3750000	2180000	4100000	3510000	3280000	1510000	3360000	3120000	4130000	4070000	3180000	3110000	3070000	3650000	2430000	3970000	3350000	2530000	2930000	2170000	2320000
F11	P03951	1470000	2580000	2430000	1980000	3630000	1270000	1420000	1220000	1320000	872607	822612	1050000	1360000	1660000	733820	1360000	822732	1760000	858703	700821	851713	631251	1350000	819068	1730000	875277	915270	1260000	855279	584078
F12	P00748	1390000	1200000	506375	687220	1810000	821271	1120000	535822	817856	773729	366258	923834	529335	940955	1970000	859479	677486	1570000	1040000	1160000	598579	603269	1670000	1230000	797441	728990	596953	1180000	438763	564250
F13A1	P00488	473597	738284	551278	616799	345541	345541	1290000	463174	641660	486486	766530	643404	662705	386521	1250000	730733	833105	418641	867896	742858	750375	483019	480964	380278	753671	893014	380278	799992	416599	888174
F13B	P05160	921751	1700000	1040000	884727	1060000	603022	615780	838624	951196	904264	1050000	940232	1500000	1010000	2960000	834072	1040000	888284	1440000	1940000	965767	1230000	1090000	727536	1180000	1410000	660033	1570000	1090000	960521
F2	P00734	3750000	4930000	4070000	4590000	5330000	6690000	93200000	4370000	4930000	3880000	3850000	3280000	4170000	4090000	6100000	3230000	3470000	4480000	3640000	5490000	4710000	5830000	5860000	6510000	4440000	7420000	3310000	6420000	5810000	4540000
F5	P12259	20200000	17800000	14500000	12400000	6990000	11900000	18400000	15900000	19400000	17700000	10400000	11800000	8480000	12900000	3850000	14700000	9730000	15100000	10900000	9210000	16900000	15000000	19500000	12000000	15200000	9230000	6900000	7480000	16000000	6880000
F7	P08709	11800000	14200000	12600000	10700000	12700000	12700000	11700000	11100000	13900000	14400000	10800000	8270000	12500000	14100000	7970000	13800000	11100000	11400000	14800000	12600000	15700000	15600000	11900000	11900000	11300000	8070000	13600000	7710000	14500000	17500000
F8	P00451	411287	437336	476492	565407	487716	444952	499097	690378	536820	230964	625959	501043	435498	308273	350848	415586	390574	335928	335864	299297	339417	298575	414957	291214	278685	303494	113820	446924	247782	277429
F9	P00740	197000000	244000000	313000000	278000000	218000000	311000000	266000000	212000000	266000000	208000000	212000000	194000000	215000000	192000000	74000000	182000000	163000000	130000000	163000000	200000000	214000000	200000000	193000000	137000000	271000000	145000000	128000000	143000000	234000000	167000000
FABP1	P07148	1470000	1470000	1700000	1470000	2540000	1600000	1830000	2520000	4900000	2580000	2780000	1870000	1540000	1340000	1810000	2210000	1990000	1340000	2010000	3620000	3400000	5780000	1690000	2240000	2330000	1350000	4500000	1540000	1350000	1350000
FAM114A2	Q9NRY5	158445	158445	175245	477653	158445	158445	158445	224715	158445	339462	158445	965665	439100	537560	274723	280560	372895	486838	340641	274723	569902	521434	73442.3	474756	564652	230032	599766	272054	242656	73442.3
FAP	Q12884	76262.3	17602.1	68346.1	17602.1	17602.1	17602.1	29912.3	76117.2	30880.9	62347.2	17602.1	144623	93211.9	100575	46352.9	53859.9	140292	76468.9	138178	29107.1	86562.6	33385.9	116248	78617.2	85796.9	118234	102410	88888.3	75216.3	86746.8
FBLN1	P23142	2510000	4290000	2660000	3490000	4080000	3910000	1900000	1600000	3030000	3120000	2120000	2810000	3830000	3070000	4170000	3840000	2720000	4870000	5530000	3390000	2910000	3440000	3720000	4640000	2770000	4840000	2890000	7990000	1910000	5140000
FBLN5	Q9UBX5	573936	1190000	533333	1140000	360518	1460000	548337	375679	638099	313809	682296	598772	887540	803482	881614	498888	622660	363240	539853	702059	725177	493504	513878	1320000	455417	1090000	237970	1800000	327721	1840000
FBLN7	Q53RD9	335164	217530	366814	392585	441151	290475	425363	404470	371698	459549	272590	330077	400566	466424	997666	592644	354672	454235	502552	500546	502199	324580	613997	658033	528198	866979	473070	662830	351622	721851
FBXO7	Q9Y3I1	167102	235407	167102	311399	167102	219202	223293	171323	167102	269653	167102	551046	338397	395686	246436	253095	360286	274982	435389	411712	550601	508232	286398	598151	129181	106076	419696	322426	396391	189245
FCGBP	Q9Y6R7	183503	47706.6	117632	47706.6	63792.5	52806.2	47706.6	58578.5	47706.6	54780	74311.4	56592.7	43898.2	58204.3	43898.2	43898.2	129695	95677.6	103620	52625.4	43898.2	43898.2	8026.19	8026.19	8026.19	8026.19	8026.19	86348.7	8026.19	19097.2
FCN2	Q15485	357193	131133	352629	131133	131133	215999	206051	428432	276102	395620	131133	145679	145679	145679	145679	145679	145679	233355	145679	335569	391088	145679	125535	249765	125535	125535	125535	125535	267255	125535
FCN3	O75636	9660000	4950000	13800000	6140000	6850000	5300000	9930000	9730000	6660000	7040000	6950000	5770000	6490000	6590000	1320000	3940000	5000000	7180000	14500000	3740000	5420000	5810000	1220000	5380000	6760000	4150000	7170000	4470000	5740000	3590000
FCRL5	Q96RD9	46902.4	42465.8	25009.2	51762	25009.2	25628	58732.7	57507.6	80111.9	25009.2	25009.2	65769.5	28444.2	49334.9	28444.2	76823.6	28444.2	69866.7	28444.2	28444.2	67920.7	28444.2	80218.3	70975.2	52721.1	68029.6	42136.2	50730.2	109241	42136.2
FERMT3	Q86UX7	1590000	1450000	755614	1780000	649141	1230000	3800000	1110000	577218	731745	570229	2510000	1160000	699556	783073	1180000	1860000	667902	784158	883972	1480000	1080000	953725	684674	4640000	474542	564579	538045	711895	807600
FETUB	Q9UGM5	2290000	1710000	2350000	2150000	1940000	2840000	1670000	1440000	1540000	1310000	2050000	1310000	1360000	2080000	2660000	2170000	2230000	3980000	1940000	1860000	2000000	1150000	1960000	2790000	1410000	3550000	2400000	2420000	1290000	1470000
FGA	P02671	1690000000	1760000000	1610000000	1280000000	883000000	1060000000	952000000	1130000000	1600000000	1700000000	1780000000	1250000000	1050000000	1140000000	820000000	1110000000	927000000	1340000000	1120000000	1350000000	1310000000	1460000000	1130000000	767000000	1220000000	945000000	626000000	857000000	2010000000	1360000000
FGB	P02675	2120000000	2120000000	2370000000	1660000000	1360000000	1380000000	1150000000	1420000000	2340000000	2780000000	2860000000	1670000000	1290000000	1600000000	942000000	1410000000	1040000000	1900000000	1620000000	2120000000	2190000000	2230000000	1340000000	850000000	1510000000	1210000000	867000000	999000000	2930000000	1930000000
FGFBP2	Q9BYJ0	127092	127092	127092	127092	127092	127092	127092	127092	127092	127092	127092	38836.2	38836.2	38836.2	38836.2	38836.2	38836.2	38836.2	217396	38836.2	38836.2	38836.2	99620.2	99620.2	156435	278612	99620.2	184679	190059	335188
FGG	P02679	999000000	1010000000	1160000000	764000000	617000000	647000000	648000000	703000000	1140000000	1340000000	1390000000	827000000	565000000	732000000	430000000	655000000	493000000	943000000	732000000	970000000	1010000000	1040000000	625000000	393000000	696000000	529000000	343000000	484000000	1410000000	857000000
FGL1	Q08830	2830000	10600000	23200000	2730000	9430000	3120000	4030000	6870000	10600000	1130000	17600000	9170000	3940000	9210000	1930000	4850000	3800000	4860000	10800000	4420000	3490000	5520000	4250000	5920000	3810000	5600000	2590000	6440000	2440000	5580000
FGL2	Q14314	2420000	3000000	3080000	4340000	3250000	3700000	2650000	4030000	2640000	3130000	4250000	2870000	5060000	4700000	2070000	2910000	2740000	3760000	2840000	3530000	2790000	4620000	2320000	4890000	3580000	3450000	2290000	4980000	3630000	4450000
FH	P07954	872398	225288	136504	136504	136504	136504	136504	136504	246551	136504	136504	461994	773907	184895	433588	46731.6	46731.6	458318	46731.6	221731	281101	46731.6	800293	310122	56655.7	470113	56655.7	720117	56655.7	56655.7
FKBP4	Q02790	176627	100516	189243	169018	54397.2	90393.7	165873	54397.2	54397.2	54397.2	54397.2	291318	226996	195913	94162.3	158369	183398	184472	138735	94162.3	230250	283277	183480	251575	208140	104487	220817	133220	174634	158779
FLG	P20930	176776	135501	193878	279208	2520000	296445	31037.2	187740	283735	394652	129726	442203	427648	194052	232654	309099	236764	388300	211866	301536	376459	336470	29235.3	286621	745489	251686	29235.3	161208	29235.3	134266
FLG2	Q5D862	158189	29384	170622	92426.8	1690000	123706	29384	52940.4	29384	69252.8	46196.6	291511	202878	116522	155914	200758	148297	180677	175471	123546	116522	143992	132071	158455	446884	87422.9	90796.7	85786.8	278472	85786.8
FLNA	P21333	1290000	438272	178159	184645	334840	258276	262870	348653	178159	312085	252372	486935	521733	187291	167495	167495	453911	167495	167495	167495	167495	167495	714159	409528	309329	207921	226721	293734	207921	207921
FLNB	O75369	720043	335560	368868	243432	83158.5	302026	134694	83158.5	83158.5	83158.5	128517	607745	953531	469523	226166	267460	427478	489726	456273	252327	347446	435591	846262	179171	1030000	216684	179171	179171	765005	179171
FMOD	Q06828	341083	202848	431368	191457	214336	418971	384558	356905	387983	211641	318536	393186	208078	284252	298771	322000	624050	631943	356539	277879	197203	244367	374585	566603	255965	504905	243727	537311	288533	463165
FN1	P02751	1670000	1450000	1460000	1140000	1170000	1180000	1290000	1450000	1600000	1330000	1390000	1420000	1410000	1290000	1590000	1410000	1300000	1410000	1710000	1690000	1740000	1540000	2510000	1670000	1730000	1600000	1210000	3380000	2840000	3180000
FREM2	Q5SZK8	99326.9	203864	324328	269832	482506	201844	239561	420123	229789	236739	99326.9	208646	355582	269123	190289	310453	410029	391431	272926	190289	218734	237281	361636	301920	374151	433634	384512	327216	257218	360349
FSCN1	Q16658	1300000	519967	111107	111107	111107	111107	630969	111107	111107	111107	111107	585717	963349	276664	210715	47127.4	317370	252653	99114.4	47127.4	47127.4	47127.4	1160000	76018.7	153490	76018.7	76018.7	76018.7	76018.7	76018.7
FSTL1	Q12841	202861	90195.5	117143	74831.8	55396.4	90267.3	163571	94778.4	55396.4	132579	158272	79261.3	50144.1	72617.7	50144.1	93517.6	52344	95451.3	73564.9	97178.7	104542	91716.7	100133	59423.8	83096.8	29224.2	29224.2	29224.2	124612	108538
FUT8	Q9BYC5	243024	66151.4	66151.4	137089	66151.4	141084	203515	249763	66151.4	121824	168016	190183	83735.4	83735.4	83735.4	83735.4	83735.4	83735.4	83735.4	83735.4	83735.4	83735.4	108186	66830	92432.8	66830	66830	66830	66830	66830
GAL3ST1	Q99999	1730000	836993	944849	836993	5500000	1850000	1600000	836993	2250000	1010000	1500000	1200000	755942	755942	1800000	942292	897771	2140000	3730000	976173	1120000	4380000	759905	324156	1230000	3440000	2710000	1580000	656304	712329
GAL3ST4	Q96RP7	143042	139276	162643	207208	320246	111814	83848.8	166554	81598	152614	81598	286425	204207	243183	197657	127189	252535	274236	235040	225805	246617	166559	207533	222312	302594	237528	137399	226537	137399	222076
GALE	Q14376	521607	832550	818746	987117	529490	639212	900651	958839	916654	882938	454323	977607	840436	660377	316638	626283	1470000	760183	842299	633027	1220000	963223	922647	983988	1030000	1220000	928655	905835	905835	905835
GANAB	Q14697	684462	499329	574363	462203	403898	593436	565029	439461	574720	538555	632520	714822	697604	707190	278096	693063	522149	615088	610542	622793	751748	634556	629794	500647	605620	362237	495647	697656	522272	449073
GAPDH	P04406	10500000	10800000	5240000	16300000	18200000	5300000	12900000	5550000	4230000	7650000	3810000	16200000	15900000	17600000	13000000	6440000	16900000	5060000	13100000	4580000	13000000	5780000	7320000	27000000	10500000	2610000	14100000	11700000	8900000	3370000
GAS6	Q14393	64344.5	31889.3	79564.6	31889.3	31889.3	43102	31889.3	31889.3	31889.3	31889.3	31889.3	84757.6	36930.6	36930.6	111091	81010.1	81085.5	90297.3	92148.4	36930.6	75759.3	78237.4	44992	44992	117157	133747	44992	44992	44992	44992
GBA1	P04062	394996	314871	349699	450392	303492	293381	272907	164024	301108	228912	164024	426300	214395	214395	380113	310966	425041	370003	318666	226814	214395	214395	382510	440999	385241	227706	407177	341073	188341	401979
GC	P02774	40900000	31900000	45300000	36900000	44300000	32600000	32000000	50700000	29800000	50200000	40000000	26600000	31700000	145000000	20300000	29100000	22700000	50200000	33300000	28200000	36500000	24200000	37600000	33100000	38600000	21300000	29800000	43100000	44800000	25200000
GCA	P28676	138272	252625	163774	251278	99589.7	155841	169512	194048	319275	126889	120005	1330000	1230000	451464	178435	292306	1860000	229327	308667	350179	766219	329488	152768	176490	208578	279373	180931	162593	332622	269482
GCLC	P48506	35968.1	35968.1	35968.1	78239.3	35968.1	35968.1	100806	35968.1	35968.1	35968.1	35968.1	223293	144300	76753.3	58398.5	82789.7	58398.5	58398.5	116262	77140.6	182688	90298.6	34524.1	59246.7	90980.7	34524.1	94785.8	34524.1	34524.1	34524.1
GCLM	P48507	317895	674540	284495	826540	339925	459319	708543	221796	356540	748875	3480000	1790000	1230000	1640000	1300000	1240000	1530000	774384	1250000	1500000	1530000	1980000	626606	2070000	997653	672383	1680000	833987	1520000	851370
GCN1	Q92616	1250000	2350000	5120000	3660000	2300000	3830000	3440000	2400000	1250000	2120000	5980000	1280000	2680000	1050000	2500000	1030000	1950000	1030000	1980000	3870000	3020000	2740000	1800000	2620000	1720000	3270000	2160000	1520000	143510	131222
GDF2	Q9UK05	2890000	1340000	2710000	1820000	1340000	1390000	2230000	2070000	1890000	1400000	2410000	2200000	2180000	1190000	543071	1450000	1570000	1610000	1470000	1530000	1760000	1960000	2070000	2100000	1670000	1080000	1090000	1460000	996440	485963
GET3	O43681	177714	348600	158630	206728	104150	123493	138561	219902	167053	102866	111502	216394	234201	111963	106192	106192	121439	257265	143772	188319	193215	212262	181363	311867	121001	171837	192877	134480	63787	63787
GLRX3	O76003	91674.9	228052	58062.4	161391	58062.4	58062.4	150709	58062.4	97677.9	96738.1	58062.4	726893	373225	425765	337778	299185	729348	179144	360271	258436	466488	592062	174721	592511	474734	174721	428101	248738	304786	174721
GLTPD2	A6NH11	513865	463680	670335	735402	1000000	383191	328926	750833	408806	456242	419784	490120	814859	743763	1670000	576097	818124	626267	788959	775642	729363	447850	603372	690072	735236	1010000	733528	386603	471804	761323
GMPR	P36959;Q9P2T1	230708	390420	230515	588395	58091.3	227311	522054	228420	58091.3	623665	58091.3	1550000	1050000	744375	603412	579304	956632	398996	952729	558784	1380000	302921	583500	1440000	437576	197191	732903	265843	1770000	409788
GNB1	P62873;P62879;Q9HAV0	438370	131739	254819	131739	394444	402094	186033	323381	364135	216012	206436	181720	356766	516026	191904	390627	416030	262924	413918	348491	241622	282732	217680	198816	278938	480061	258071	400565	343087	289357
GNPTG	Q9UJJ9	369589	426970	479527	534382	419629	427166	437346	495797	665482	673756	557689	265286	286410	443077	307036	493152	400545	430696	441640	626305	677600	499543	418362	560506	715265	467602	405388	484164	290855	509871
GPC6	Q9Y625	198619	129352	150665	125351	194862	153501	136342	159275	171786	143788	150917	183117	464454	246882	204766	166730	140683	164531	253763	139984	165882	158088	307949	150005	279817	173665	167578	132978	153777	92435.8
GPLD1	P80108	103000000	126000000	129000000	202000000	101000000	126000000	79100000	111000000	194000000	184000000	71300000	121000000	216000000	191000000	125000000	190000000	87600000	154000000	119000000	126000000	150000000	131000000	250000000	159000000	215000000	105000000	166000000	100000000	186000000	203000000
GPX3	P22352	9560000	24400000	11800000	16600000	18700000	4360000	6990000	14100000	15900000	14600000	5380000	32700000	13300000	20700000	17000000	14900000	31400000	17200000	25600000	17700000	29400000	23400000	13100000	11200000	9710000	12700000	9400000	10300000	9040000	11200000
GSN	P06396	9170000	15800000	15900000	11100000	13200000	10700000	16100000	15600000	21500000	23200000	10800000	15200000	11400000	16100000	11700000	15400000	20700000	28600000	20400000	14400000	22500000	17400000	18400000	19500000	16200000	15200000	12500000	16000000	14400000	15600000
GSTO1	P78417	82719.1	277046	259319	222048	223174	290632	285237	396590	126301	82099.5	186260	432838	349737	219394	226570	304043	532432	263999	298660	126494	278182	85234.5	151047	278554	277365	52776.2	242567	210746	52776.2	96739.8
GXYLT1	Q4G148	134044	50680.5	50680.5	116231	50680.5	118392	93669.3	119623	176172	198248	50680.5	414071	253611	139201	126726	161806	147589	173991	272133	126726	441718	126726	203140	38666.2	112298	38666.2	171237	125919	38666.2	94615.5
GYG1	P46976	458684	647289	518347	787733	493474	484855	758235	660291	512950	420230	385803	1160000	1010000	948382	934548	627899	996582	414401	468842	413835	845715	677679	592459	520864	453413	373503	587578	373503	781519	579896
H1-2;H1-3;H1-4	P10412;P16402;P16403;P22492;Q02539	1970000	398877	398877	398877	938081	398877	479911	398877	398877	398877	398877	1740000	596738	902996	952530	980747	1210000	897370	1170000	596738	1650000	904462	328976	328976	597269	328976	1110000	820501	496254	328976
H2AC12;H2AC14;H2AC17;H2AC25;H2AC6;H2AC7;H2AC8;H2AJ	Q96KK5;Q99878;P0C0S8;Q7L7L0;Q93077;P20671;P04908;Q9BTM1	939915	701452	1260000	1040000	1240000	1020000	513896	1150000	429546	665710	874418	1780000	2440000	1770000	1810000	1150000	1430000	403397	480274	659322	809210	414162	1190000	1200000	1040000	1430000	2520000	1110000	607329	421717
H2BC10;H2BC12;H2BC12L;H2BC13;H2BC14;H2BC15;H2BC18;H2BC5;H2BC9	O60814;P06899;P23527;P33778;P57053;P58876;P62807;Q16778;Q5QNW6;Q8N257;Q93079;Q99877;Q99879;Q99880	1740000	799337	836854	2490000	1520000	990449	602775	1020000	494243	494243	734806	1680000	1600000	1690000	1190000	1100000	821021	688483	784209	603967	957050	494650	1310000	881223	777225	1230000	848281	1160000	632751	809789
H3-3B	P84243	350721	329290	375947	1040000	1740000	567837	248662	360155	624009	355778	1310000	663741	724641	1440000	920701	691299	454125	351373	532975	657589	467943	757015	483021	464490	464490	805604	566502	592891	464490	464490
H4C16	P62805	1020000	262663	316169	426405	639699	425800	334641	324964	435097	407945	557235	685938	479920	1300000	560134	550583	332538	441524	312674	472300	452995	543187	772786	312018	528590	766568	564887	555817	531932	932624
HABP2	Q14520	26100000	38600000	41100000	17800000	29200000	33200000	40600000	34900000	30500000	16700000	20300000	33900000	28400000	42300000	60600000	40100000	32100000	32100000	39600000	51900000	33800000	33300000	19800000	18500000	29800000	36000000	9270000	26400000	26600000	39600000
HAGH	Q16775	283041	701220	461411	937670	115563	304697	435511	330273	176016	742044	115563	3350000	1600000	1250000	1450000	1010000	2590000	875476	1940000	1050000	3380000	1240000	365459	1160000	406515	263594	1150000	504296	1090000	419380
HBA2	P69905	418328	436479	586637	1680000	672992	4740000	727394	298907	307413	5180000	430563	4820000	2210000	1210000	1910000	2370000	1390000	2170000	1240000	1710000	4510000	4600000	619518	2910000	1330000	573649	839403	2070000	1090000	500019
HBB	P68871	1450000	1810000	2350000	5170000	2280000	12600000	2740000	1310000	1220000	17300000	1510000	24400000	5450000	4150000	9490000	5460000	5300000	11000000	4850000	6500000	19800000	16100000	2850000	14000000	5390000	2250000	4340000	14600000	4520000	2040000
HBD	P02042	3930000	3930000	3930000	5970000	3930000	5290000	3930000	3930000	3930000	3930000	3930000	5680000	7380000	4950000	13300000	8510000	6900000	5620000	4950000	7620000	5740000	4950000	10200000	10200000	10200000	10200000	10200000	12500000	10200000	10200000
HGFAC	Q04756	924309	1140000	683228	710666	854494	1060000	828069	1170000	724042	939385	489641	710267	1020000	832961	855079	1250000	1010000	1080000	760884	1400000	1000000	910041	969098	1080000	751309	897139	1150000	788622	1330000	989472
HJV	Q6ZVN8	200897	156940	164558	156940	167459	196878	174408	156940	180329	156940	184977	146043	121743	121743	121743	121743	121743	121743	141509	121743	153137	121743	121595	230195	201081	233978	106664	106664	106664	106664
HLA-A	P01893;P04439;P10321	1560000	4310000	987803	860190	7280000	685910	804521	10400000	5310000	1150000	506632	6940000	9790000	1020000	8830000	1090000	873360	1520000	6830000	1730000	941060	4930000	7940000	1660000	5570000	1060000	1430000	6770000	766871	2160000
HLA-B	P01889	225303	105721	424947	451625	248086	238434	358850	360734	237026	232550	104693	257269	408930	287132	177991	496265	229940	320326	316317	242434	219432	185931	592672	305466	352280	240054	1020000	621725	264551	388906
HLA-C	P10321	552140	552140	864579	552140	552140	552140	770031	552140	552140	899982	552140	244588	244588	1040000	244588	244588	244588	762649	244588	244588	371715	244588	881643	957361	456888	910612	456888	456888	525698	940961
HNRNPA1	P09651;Q32P51;A0A2R8Y4L2	3070000	976297	752116	307095	323398	211066	192349	192836	89314.8	35087	57591	3530000	2660000	876059	958153	287209	721661	161387	175088	75049.1	117794	39129.4	4130000	1160000	438488	300342	344982	304827	798719	303363
HNRNPA2B1	P22626	2010000	1290000	1100000	405196	383749	324189	377409	494881	683523	262584	262584	2670000	2550000	942480	857879	483381	1030000	339956	387931	448109	339956	394492	3320000	1100000	464509	573923	408415	410609	408415	408415
HNRNPK	P61978	1440000	275523	293391	276293	107637	246245	373260	435019	170353	132263	123021	560053	725071	226705	320942	255913	394145	194041	193508	213324	265748	193508	974939	365262	327535	423149	533209	298718	148786	184660
HNRNPU	Q00839	1300000	571915	370061	200407	101352	144177	178265	101352	101352	101352	101352	709912	1060000	732329	714262	125633	194208	246087	110076	110076	110076	110076	1900000	834930	274322	128135	327192	333633	128135	128135
HP	P00738;P00739	32200000	56000000	72000000	67100000	51500000	56000000	91000000	38900000	26300000	71300000	48700000	45100000	42400000	33300000	49600000	51000000	47100000	25600000	31400000	79100000	39400000	33800000	63200000	53100000	48600000	26000000	47000000	14300000	70400000	90800000
HPCAL1	P37235	34132.3	35227.9	11641.8	34397.1	39935.5	39062.7	46470.1	19568.9	53727.4	16119.7	15782.2	42758.1	25062.7	40091	25062.7	33458.7	25062.7	57437.6	32527.8	25062.7	38809.8	25062.7	13546.7	52400.2	43600	13546.7	13546.7	13546.7	13546.7	13546.7
HPN	P05981	151974	64929.9	388421	64929.9	127847	126214	203971	315413	121492	162945	139067	118728	62959.9	223058	265822	281495	311930	62959.9	200435	68055.3	130977	161591	87607.8	227959	165124	87607.8	87607.8	163750	87607.8	189557
HPR	P00739	34800000	55000000	73400000	71400000	47500000	61000000	90600000	32600000	27200000	112000000	30300000	40400000	33800000	23300000	43000000	64600000	50400000	37900000	34000000	101000000	49600000	33400000	58000000	33200000	54500000	18300000	56000000	17400000	99600000	147000000
HPX	P02790	316000000	518000000	397000000	405000000	357000000	387000000	461000000	404000000	295000000	372000000	392000000	309000000	341000000	316000000	98600000	333000000	257000000	289000000	266000000	376000000	311000000	421000000	261000000	268000000	295000000	187000000	214000000	141000000	277000000	310000000
HRG	P04196	4930000	1900000	3790000	2320000	3150000	2110000	2270000	2770000	2630000	2600000	3150000	2010000	8650000	2580000	2140000	2550000	2820000	6560000	2470000	5480000	5170000	1990000	4550000	4060000	5050000	2860000	4690000	3460000	2750000	1910000
HRNR	Q86YZ3	105504	63143.9	175736	256256	4490000	315423	288728	209076	258146	259627	490946	711353	423660	218570	199157	417349	483039	834227	294714	423596	552064	847504	76840.1	426149	3070000	307299	256655	225365	202267	380348
HSD11B1	P28845	185983	199214	70505.2	70505.2	87772	89033.5	205041	102076	70505.2	70505.2	157054	201861	126736	157771	126736	151715	126736	126736	272900	168377	158875	165292	206467	132894	169591	262566	237708	225584	28841.3	123320
HSD17B10	Q99714	10100000	3050000	634596	2000000	1280000	933886	876036	1920000	4380000	634596	4910000	4810000	5210000	3000000	1110000	413464	1040000	562410	198348	3250000	198348	198348	7520000	1680000	733788	551500	2200000	952404	551500	4770000
HSD17B4	P51659	317549	246479	246479	246479	246479	246479	246479	246479	246479	246479	246479	180409	144808	144808	144808	144808	163416	144808	144808	144808	144808	144808	262268	45961	104379	135418	338601	45961	133035	45961
HSP90AA1	P07900;P08238;Q14568;Q58FF8	1080000	1120000	949482	1470000	1670000	1660000	1250000	2010000	1170000	999415	1040000	1380000	2550000	1230000	748983	946087	1040000	1020000	1090000	741086	1160000	745180	1030000	1650000	1180000	1010000	1560000	1530000	907444	702211
HSP90AB1	P08238	631996	643276	687746	854218	760495	946656	1040000	1050000	606097	522500	502400	925116	1160000	619544	386153	606757	874726	681686	659820	378927	925957	531500	676383	877960	783914	647434	906102	766962	522678	438360
HSP90B1	P14625	9450000	15500000	12200000	10200000	10900000	8160000	13100000	8780000	14600000	12800000	11200000	8200000	9340000	10700000	5000000	9510000	7540000	10500000	10000000	11900000	7390000	11100000	8610000	12300000	12000000	9490000	5170000	9120000	6050000	5110000
HSPA1A;HSPA1B	P0DMV8;P0DMV9	717047	442574	411606	440756	729501	289361	465823	380668	183380	386624	311283	618875	825262	411144	183033	356715	618413	353531	324140	183033	360885	283650	647026	548817	925646	384172	371313	430319	498203	662382
HSPA5	P11021	2260000	1930000	1590000	1680000	1960000	1750000	2470000	1770000	1560000	1550000	1750000	1740000	1600000	2280000	1200000	1880000	1640000	1650000	1780000	1960000	2060000	2030000	2300000	1940000	2540000	1810000	1730000	1970000	1500000	1830000
HSPA6	P17066	2000000	2070000	1520000	1710000	3130000	1290000	2310000	2050000	1550000	1290000	1600000	3020000	3020000	2420000	1620000	2100000	2320000	1810000	1640000	1800000	2270000	1850000	2390000	2480000	3240000	2060000	2050000	2190000	1600000	1600000
HSPA8	P11142;P54652	778486	742507	527072	690675	981580	589631	575371	732297	637504	545434	471109	897572	1090000	1060000	510675	661269	616060	467197	573604	638228	921277	597011	778279	962735	1470000	585745	864188	884025	501926	500432
HSPA9	P38646	3180000	98943.4	110933	64462.3	52805.3	52805.3	72104.8	67724.6	52805.3	142737	55913.1	518697	316074	59339.8	141579	94722.2	122078	23163.1	79825.3	123152	121407	135991	1040000	167445	60131.4	98827.1	199889	60131.4	60131.4	60131.4
HSPD1	P10809	4110000	1380000	1060000	867226	355651	525414	483404	893136	153854	394066	475343	3480000	4670000	2230000	1540000	883192	1010000	650119	866010	394695	926400	412757	5190000	1980000	976718	1040000	1530000	789666	392217	645047
HTATIP2	Q9BUP3	10	10	10	10	10	10	10	10	10	10	10	29237.1	38122	37674.8	54921.4	33135.7	39574.7	80589.7	20086.2	20086.2	42968.4	20086.2	69909.4	161780	34567.7	205037	34567.7	104631	34567.7	34567.7
HTRA1	Q92743	463096	1000000	1000000	972243	928203	1260000	636178	938115	737551	557937	741859	654844	805700	404192	613482	673189	467561	621113	793177	556584	578207	384911	565010	870385	838277	1020000	750106	1210000	557872	1050000
HYAL1	Q12794	33508	31837.4	39854.8	37750	31837.4	74778	74560.1	70877.2	56401.8	49519.9	31837.4	53848.3	25845.2	25845.2	25845.2	26628.1	25845.2	59733.9	48064.6	25845.2	57936.8	25845.2	97075.4	78073.6	22087.5	22087.5	36194.4	22087.5	22087.5	22087.5
HYDIN	Q4G0P3	461031	555212	730849	676413	970205	824791	529580	608151	394789	491697	821794	813000	413617	413617	1220000	522267	653672	413617	662344	1110000	649112	586297	584668	794052	592266	823042	878324	724211	304119	187919
HYI	Q5T013	13300000	18700000	25300000	26500000	19300000	22800000	34200000	29600000	21800000	35500000	32500000	17700000	15400000	13700000	4560000	17700000	14700000	18700000	14000000	25100000	30800000	29000000	8640000	11700000	17100000	11700000	12400000	8150000	44700000	21900000
HYOU1	Q9Y4L1	14100000	10900000	11300000	13400000	17200000	8570000	15900000	12400000	13100000	11000000	12000000	12600000	17200000	25500000	11700000	12700000	9370000	12800000	11900000	16300000	11800000	13600000	20200000	10200000	14600000	14500000	13400000	14300000	15200000	12800000
ICOSLG	O75144	53592.8	38496.7	23382	20443.8	23885.3	38150.7	31602.1	53061.8	47223	44648	33708.2	21065	9687.37	9687.37	9687.37	27401.8	9687.37	65083.9	29820.3	18976	17889.8	26923.2	14897.6	14897.6	41186	18819.9	14897.6	14897.6	20601.9	14897.6
IDH1	O75874	257205	437388	360053	343859	731572	389059	408553	441551	257916	466990	247521	865188	1400000	794268	904391	1220000	1280000	568969	808408	430588	963492	368055	588987	855599	1070000	647430	742459	965610	431719	429970
IGF2	P01344	1030000	1280000	947853	1410000	1160000	1090000	599871	1500000	1010000	1120000	768149	1280000	983130	1580000	1620000	1480000	1720000	928874	1450000	2830000	1060000	2280000	1450000	1550000	1050000	2600000	1160000	2850000	416932	581777
IGF2R	P11717	1740000	1080000	2010000	2720000	1360000	1050000	1490000	1870000	983345	1290000	1470000	950086	1250000	1200000	938727	872886	838033	1030000	1110000	1010000	1130000	1060000	1380000	900103	2440000	1560000	1640000	1260000	1140000	759161
IGFALS	P35858	6360000	9650000	10200000	7970000	11600000	8090000	4120000	12800000	4850000	8130000	3250000	9830000	6230000	10200000	5940000	8340000	5560000	6630000	7840000	8750000	6730000	7990000	10200000	5660000	5530000	7580000	5510000	9880000	5240000	6990000
IGFBP2	P18065	44566	44566	44566	44566	44566	44566	293474	265354	324071	227875	738234	288961	180464	180464	579867	228710	282220	180464	639655	290704	308021	407462	72945.1	1490000	72945.1	501245	72945.1	549152	72945.1	532487
IGFBP3	P17936	464110	772113	603507	600799	450942	533967	436874	734237	633147	794539	475509	612822	562512	838944	448900	739365	549765	583286	738289	1310000	636573	1170000	724562	665344	449436	932917	351041	866612	516208	497425
IGFBP5	P24593	110043	298263	172390	174956	110043	202176	441161	261528	247126	223501	231535	340249	155432	278058	624524	253584	191250	147599	314811	727236	248005	416495	203935	134162	225231	555457	75636	304987	75636	193348
IGHA1	P01876	51400000	66100000	47300000	44300000	262000000	28600000	42200000	26500000	85300000	68500000	67600000	37800000	23300000	78700000	73900000	22600000	36400000	65200000	31300000	60600000	27500000	41700000	37900000	74100000	113000000	43100000	17800000	94600000	71600000	133000000
IGHA2	P01877;P0DOX2	5840000	4740000	12700000	5190000	10700000	2770000	9100000	1950000	10300000	12100000	5980000	6710000	3770000	10200000	5020000	7220000	1680000	5000000	2060000	7440000	3650000	9400000	4260000	3280000	8940000	5890000	1970000	4070000	27600000	21600000
IGHG1	P01857;P01860;P0DOX5	137000000	146000000	90900000	126000000	313000000	108000000	105000000	132000000	206000000	280000000	121000000	104000000	106000000	195000000	362000000	138000000	157000000	201000000	196000000	424000000	181000000	222000000	119000000	415000000	742000000	139000000	131000000	495000000	145000000	522000000
IGHG2	P01859	250000000	255000000	85900000	247000000	493000000	77000000	152000000	169000000	91700000	141000000	83200000	171000000	170000000	274000000	347000000	228000000	172000000	163000000	155000000	577000000	188000000	182000000	107000000	303000000	641000000	136000000	424000000	833000000	300000000	512000000
IGHG3	P01860	7430000	13200000	3040000	1890000	36600000	9620000	12300000	9410000	9580000	5400000	11400000	2500000	2110000	10400000	9550000	6280000	14000000	30700000	7150000	11200000	5360000	1760000	6550000	8910000	15500000	4260000	4870000	5190000	2050000	10600000
IGHG4	P01861	3000000	2350000	9590000	2530000	6950000	1260000	2330000	3390000	8830000	10900000	1870000	4140000	3180000	2710000	2260000	4110000	6260000	13600000	11400000	5440000	7770000	6280000	1720000	4350000	8040000	2390000	4080000	6050000	5650000	2150000
IGHM	P01871	101000000	208000000	87400000	56700000	425000000	219000000	98000000	683000000	183000000	114000000	142000000	87100000	145000000	243000000	498000000	142000000	230000000	387000000	280000000	142000000	57700000	100000000	142000000	105000000	196000000	128000000	159000000	102000000	150000000	202000000
IGHV1-3	A0A0C4DH29	179806	179806	179806	333731	220720	1150000	579136	195157	375195	302931	329133	60055.5	46739.4	673821	380500	46739.4	211696	239993	260630	666884	46739.4	456210	155040	616575	548392	172198	155040	4140000	155040	842267
IGHV2-26	A0A0B4J1V2	588953	313473	313473	313473	373816	313473	560610	313473	319878	810150	1240000	62906.6	62906.6	62906.6	728780	62906.6	62906.6	62906.6	452810	62906.6	62906.6	62906.6	484163	986847	526222	174667	449646	800012	174667	174667
IGHV3-13	P01766	581712	1120000	336000	335062	820953	829065	552086	661977	577387	419975	518323	406232	298339	699536	373461	326215	634501	403486	683511	1000000	509377	614520	470216	575060	392485	553771	381050	917453	410163	372028
IGHV3-15	A0A0B4J1V0;A0A0B4J1V6;A0A0B4J1Y9	8090000	12300000	3050000	2450000	12500000	6730000	6650000	6500000	6830000	5460000	9120000	6160000	4420000	12500000	10300000	6220000	8780000	10900000	7820000	10200000	4840000	3480000	6710000	11600000	8850000	17200000	4530000	6660000	8080000	6230000
IGHV3-30;IGHV3-30-5	P01764;P01768;P0DP03	2430000	3480000	1810000	3010000	5980000	1830000	2420000	3010000	2920000	2540000	3050000	2690000	1620000	2830000	3970000	3390000	4370000	3850000	3560000	4890000	2600000	2810000	2180000	6860000	4610000	2180000	2460000	3200000	3330000	8140000
IGHV3-35	A0A0C4DH35	1620000	1540000	360958	446600	1020000	673553	1160000	494630	989897	884072	1450000	593055	527876	2890000	3610000	708893	851409	897269	961008	1330000	527876	753060	633750	549404	1090000	606336	332124	810625	753605	892218
IGHV3-38	A0A0C4DH36	498442	2100000	258833	953844	1230000	780912	905457	299062	650026	727578	514834	457944	435646	1440000	1020000	706667	699146	958216	349621	1030000	363039	316358	434141	695682	1120000	685073	704650	911747	801236	2290000
IGHV3-43	A0A0B4J1X8	403090	256375	266011	408426	136095	373458	207954	415901	676250	336465	232740	342946	124617	1130000	124617	298943	467989	885764	214402	509634	207318	344774	129302	414524	362283	312425	129302	204478	203796	178730
IGHV3-43D;IGHV3-9	P01782;P0DP04	1110000	1090000	353111	520943	1440000	523621	806095	880410	713735	378679	491789	790244	232158	2520000	657680	816104	677447	1360000	667251	1400000	867585	1120000	626340	939773	527935	456807	147896	513468	840906	455640
IGHV3-49	A0A0A0MS15	500449	709501	869929	576136	513280	835238	653945	691552	990267	651283	688250	425417	360321	1140000	624904	779034	691411	1020000	599293	14000000	1500000	372297	245397	1020000	1050000	462026	505263	497688	911956	2740000
IGHV3-64D	A0A0J9YX35	1000000	722938	360954	221121	1720000	910254	1260000	156672	1180000	751212	497557	521269	510716	1390000	14900000	832691	895025	918331	1530000	1070000	510716	577021	483990	946446	1150000	284041	284041	476074	1900000	1230000
IGHV3-7	P01762;P01763;P01767;P01772;P01780;A0A0B4J1V1;A0A0B4J1X5;A0A0C4DH42;A0A0J9YVY3;P0DP02;P0DOX2	20800000	17600000	10700000	15700000	64400000	19600000	22500000	21500000	20900000	38800000	12900000	13700000	11800000	37400000	69600000	19500000	26100000	29700000	25400000	36200000	10900000	21200000	18300000	22700000	56100000	20900000	14300000	24000000	17600000	38500000
IGHV3-73	A0A0B4J1V6	1080000	948933	807411	1110000	2910000	807353	1160000	966245	866424	1190000	1590000	1070000	909668	909668	2040000	1120000	909668	1190000	909668	3000000	909668	1130000	557803	1810000	557803	1190000	557803	4490000	557803	2540000
IGHV3-74	A0A0B4J1X5	4140000	8860000	5780000	4180000	8480000	7790000	7920000	7540000	5720000	7700000	4730000	6260000	7270000	10600000	17600000	6400000	10800000	9260000	6440000	12200000	3420000	5790000	4350000	8920000	7720000	7960000	3710000	8420000	3730000	2600000
IGHV4-28	A0A0C4DH34	1800000	1930000	1400000	736609	2290000	1050000	845725	817171	2020000	1060000	1710000	1470000	1110000	2290000	1850000	1880000	1500000	1690000	2130000	3210000	1110000	1800000	724162	2260000	11100000	5510000	1420000	5390000	1900000	4650000
IGHV4-34	P06331	5250000	4360000	1900000	4340000	76600000	7830000	3720000	2870000	6740000	5290000	5550000	6310000	4060000	5110000	3640000	6500000	5810000	10200000	4240000	22300000	2700000	4780000	3280000	15600000	55200000	5780000	5320000	28100000	19100000	64500000
IGHV5-10-1	A0A0C4DH38;A0A0J9YXX1	829887	1040000	1020000	122635	749378	130725	128906	777064	122635	997705	1020000	92555.7	5440000	92555.7	2490000	709771	1430000	154217	855433	126638	134533	159598	177339	2510000	1370000	177339	262044	177339	177339	177339
IGHV5-51	A0A0C4DH38	751414	752762	472829	402725	523715	595592	534638	395411	807693	998848	575120	449442	451719	713368	421979	419751	422074	685187	739306	630357	405648	781474	435214	834894	1540000	310627	255579	605532	1390000	1840000
IGHV6-1	A0A0B4J1U7	2610000	2950000	2110000	1810000	2870000	2490000	2870000	2480000	2530000	1630000	2570000	2310000	2670000	2450000	12300000	2320000	3070000	3190000	5810000	4170000	2380000	2690000	2480000	4350000	3890000	1680000	1740000	2410000	2100000	1790000
IGKC	P01834;P0DOX7	18300000	18700000	11300000	14300000	32800000	11800000	21900000	17900000	21300000	20900000	20400000	14800000	14400000	17100000	16500000	15800000	12100000	24400000	25400000	32100000	20300000	13800000	14200000	24500000	61300000	14000000	14700000	22700000	37500000	50400000
IGKV2-24;IGKV2D-24	A0A075B6R9;A0A0C4DH68	180538	180538	180538	180538	396100	211501	180538	180538	275241	255753	216719	799981	238179	366260	425873	238179	340914	238179	689447	255714	238179	238179	102194	262127	1340000	102194	102194	436392	438827	699809
IGKV2D-29	A0A075B6S2	1500000	4140000	1530000	2280000	5590000	1590000	1400000	1940000	1420000	1680000	1400000	1990000	1330000	1970000	3760000	1930000	1770000	3340000	4650000	2280000	1270000	1340000	1940000	6800000	24100000	3190000	1850000	5330000	1680000	4880000
IGKV3-11;IGKV3D-11	P04433;A0A0A0MRZ8	1940000	987602	2380000	1180000	2530000	1700000	1430000	1220000	1440000	1300000	788563	1430000	1120000	1290000	2080000	1220000	1890000	2360000	1410000	1720000	1050000	1120000	1560000	3690000	5260000	1950000	991810	3170000	1380000	1620000
IGKV3-15	P01624	3600000	2760000	2950000	2420000	11700000	3430000	3920000	3030000	2830000	2710000	2510000	3810000	1740000	3140000	3900000	4030000	4260000	4560000	4350000	4470000	3150000	2310000	4710000	5970000	15700000	4910000	2950000	5030000	3310000	6550000
IGKV3-20	P01619	3950000	3020000	2240000	2420000	39300000	3720000	4330000	5050000	3300000	1840000	2990000	3570000	4400000	6890000	5610000	3360000	3400000	8870000	6570000	2820000	1950000	2370000	4910000	8760000	19700000	2710000	14800000	15700000	2970000	9060000
IGKV3D-15	A0A087WSY6	271395	220998	220998	267084	220998	220998	398885	220998	293340	343097	403379	209074	209074	530249	209074	257497	287527	209074	209074	220899	209074	277406	363897	448556	699105	683219	320138	432240	521419	320138
IGKV4-1	P06312	1080000	705475	726950	646823	143954	1410000	1290000	1320000	942878	919895	807556	1120000	374084	2790000	1250000	1510000	1020000	1540000	1530000	1350000	541575	747542	1050000	1340000	4930000	898625	559633	3380000	1230000	5890000
IGLC2;IGLC3	A0M8Q6;P0CF74;P0DOY2;P0DOY3	21200000	19500000	11600000	13600000	49300000	13600000	12200000	29200000	23600000	19700000	13800000	17200000	17900000	26400000	92500000	15500000	19500000	22400000	23600000	34700000	14200000	15800000	11500000	35400000	34100000	14900000	37000000	53900000	12800000	41900000
IGLL5	P0CG04;B9A064;P0DOX8	4230000	4150000	2940000	4750000	5690000	3080000	3200000	3600000	3160000	4820000	2990000	3540000	4260000	5220000	11600000	3120000	3260000	3910000	3580000	10500000	3820000	3100000	6660000	9350000	9410000	6490000	2720000	9370000	2450000	7740000
IGLV1-47	P01699;P01700	40452.7	40452.7	40452.7	40452.7	40452.7	150815	40452.7	40452.7	40452.7	1070000	40452.7	81842	81842	81842	81842	81842	81842	81842	184945	81842	81842	81842	143948	538182	1070000	86760.6	86760.6	4740000	86760.6	819124
IGLV1-51	P01701	492487	283509	739368	570518	469708	2640000	283509	35300000	1120000	421362	283509	462874	166409	2130000	166409	166409	852131	12500000	311520	680723	174376	343826	58385.8	1370000	887154	229033	1350000	836680	58385.8	1470000
IGLV2-8	P01709	569495	319725	319725	319725	1240000	545697	319725	330584	319725	319725	482716	2530000	248105	96365.5	369263	96365.5	468923	439225	904378	711119	457457	96365.5	512005	4680000	3720000	898231	110660	7010000	244353	1180000
IGLV3-16;IGLV3-25;IGLV3-27	P01717;P01718;A0A075B6K0	233944	114275	114275	114275	114275	465959	254633	186633	171591	132626	395394	117008	274846	168899	117008	117008	117008	117008	203624	233491	117008	337386	206851	314670	206851	206851	206851	206851	542994	206851
IGLV3-19	P01714	274110	129863	169389	231659	256221	196065	329041	154231	236955	213550	448477	238759	199009	434088	199009	244422	263895	525296	370415	437210	329976	221485	456881	724854	318413	312707	169778	386731	287483	457438
IGLV7-46	P04211;A0A075B6I9	649750	415465	415465	415465	8790000	462518	688960	431695	668615	1030000	669633	608735	608735	1410000	1100000	1570000	608735	608735	1070000	2770000	700059	897200	198185	833805	1330000	198185	297963	1270000	198185	303899
IGLV8-61	A0A075B6I0	968702	1120000	940143	571643	9640000	639853	368356	1900000	938245	207846	1090000	427339	427339	716310	1710000	427339	1740000	427339	545775	5200000	427339	2140000	347201	4600000	7420000	2680000	173672	12700000	965909	9370000
IHH	Q14623	124231	124231	124231	124231	559955	124231	124231	124231	124231	124231	124231	410455	539519	309736	696696	360504	454482	527854	145706	145706	145706	145706	207339	207339	207339	727466	207339	509261	207339	333097
IL1RAP	Q9NPH3	524721	832889	464378	763757	825088	835036	695740	894816	752660	754404	512105	612651	637933	750760	430686	531847	704138	395365	782612	633637	543636	566769	683527	472713	581832	504322	391885	538876	436277	492619
IL6R	P08887	243534	321202	168534	354248	168534	280901	261026	331539	210074	267418	241805	258457	220090	304487	220090	243774	288844	226137	220090	272387	294228	331247	270755	286054	299811	369468	114622	124017	114622	134068
IL7R	P16871	37214.1	37214.1	37214.1	37214.1	37214.1	37214.1	62398.2	64798.1	97740.1	109934	137363	212354	48379.6	197196	48379.6	48379.6	197645	130839	163630	205612	48379.6	248070	125684	125684	125684	125684	125684	125684	125684	125684
INHBB	P09529	482860	515855	1100000	440990	306272	309875	755679	479537	1220000	507719	917891	436087	226948	191400	191400	312571	248471	205002	560479	319134	526535	540186	294869	279387	434989	218851	326053	175424	706254	175424
INHBC	P55103	15800000	18200000	17600000	16700000	16500000	13400000	18200000	14700000	21600000	18700000	14100000	8580000	19400000	22500000	11000000	16200000	10700000	10100000	12700000	17300000	18300000	21700000	16900000	15500000	19600000	14400000	16300000	17800000	18300000	23100000
INHBE	P58166	1280000	1120000	1610000	1070000	1040000	1160000	643568	1510000	1800000	1130000	1330000	797413	1360000	1400000	1340000	1360000	722205	607402	747043	965955	1020000	1190000	1670000	1690000	1470000	616192	1360000	1320000	1700000	884926
INSL3	P51460	143249	143249	239124	332221	143249	143249	143249	143249	143249	188649	143249	189150	189150	189150	189150	189150	189150	189150	189150	189150	480842	189150	149495	90916.3	112034	63350.9	98576.3	63350.9	128705	63967
IPO5	O00410;O60518	230792	103944	103944	103944	103944	103944	127621	103944	689527	909140	103944	442656	496893	127956	146576	153594	376742	157487	226874	596503	415844	127956	120460	150882	146608	120460	372009	120460	124199	120460
IQGAP1	P46940	519741	516758	694490	574269	312496	441988	380453	466090	312496	1170000	981090	690648	896491	777263	294991	427966	785526	294991	570290	780653	844017	769877	963386	551544	583750	781190	1170000	469592	579510	1130000
ITGA11	Q9UKX5	291414	127174	182953	127174	197675	127174	127174	292032	299131	287625	127174	577697	266735	589950	499406	466701	568315	628543	545654	317674	322036	320381	470312	247599	333116	457319	333513	390263	319504	493030
ITGA2	P17301	396733	397634	214479	261472	315678	351442	311015	273076	222349	239920	178213	491867	373500	518283	498691	609962	480532	483417	654114	363928	281772	310885	293144	291047	294612	631441	315195	311876	234012	301339
ITGAM	P11215	517803	272894	130245	48300	48300	94406.9	60915.3	145088	195533	147466	136086	242076	289454	311295	279380	239509	395357	232516	206174	183913	222609	137978	323492	190001	118356	239846	220515	198918	128385	197123
ITGAV	P06756	63518.9	12303.9	12303.9	12303.9	12303.9	12303.9	12303.9	68984.6	12303.9	12303.9	13555.4	95413.1	62139.8	25219.8	25219.8	60959.1	132366	66723.2	57554.8	25219.8	28207.5	25219.8	126947	49297.7	34579.5	97291.3	34579.5	34579.5	34579.5	34579.5
ITGB1	P05556	1430000	965842	1290000	1100000	1330000	1050000	969930	1450000	909436	1000000	843517	1960000	1840000	2050000	2160000	1840000	2410000	2000000	2550000	1100000	1090000	996695	1450000	1470000	1510000	2310000	1340000	1970000	927320	1480000
ITGB2	P05107	231074	55591	137512	55591	155216	187154	112512	331636	265940	165314	138253	267836	400137	259638	387859	371445	529849	312136	323222	181701	247692	214127	254743	186636	128145	414732	190656	331556	260636	223366
ITIH1	P19827	30000000	33000000	26700000	26500000	37500000	29300000	23600000	24800000	27500000	32800000	19800000	20200000	21500000	29200000	14400000	25300000	17900000	43100000	23600000	28700000	23900000	29300000	22100000	26300000	22000000	28500000	20700000	26400000	27400000	21600000
ITIH2	P19823	137000000	149000000	98500000	97300000	124000000	108000000	110000000	145000000	83300000	124000000	58300000	96400000	120000000	132000000	65800000	128000000	88200000	124000000	129000000	117000000	110000000	115000000	90400000	121000000	113000000	121000000	77200000	148000000	74900000	62300000
ITIH3	Q06033	10700000	20800000	21000000	16800000	15300000	18100000	24400000	23000000	27000000	13000000	17300000	6560000	8400000	13500000	5310000	16700000	7400000	9800000	18600000	9430000	11500000	8170000	5840000	14900000	13600000	10700000	6820000	17700000	6750000	11800000
ITIH4	Q14624	70900000	52200000	72800000	58200000	32100000	50300000	132000000	60600000	97600000	140000000	119000000	127000000	32100000	24200000	30300000	27300000	27500000	71700000	35700000	75200000	81300000	86300000	119000000	30200000	63800000	59700000	13300000	23300000	97600000	32900000
ITLN1	Q8WWA0	4880000	1820000	2430000	1730000	3440000	2250000	2150000	2240000	2350000	4440000	2710000	2660000	3790000	3020000	2450000	3300000	3930000	4110000	5920000	1790000	3930000	1400000	1510000	2600000	1230000	1140000	1380000	1970000	2050000	6650000
ITM2B	Q9Y287	80507.6	51473.9	55947.8	48847.5	61898.2	51734.1	41650.5	41650.5	65004.8	97014.9	41650.5	61313.3	60215.4	65186.6	13284.4	83804.1	13284.4	87210.4	48974.3	13284.4	13284.4	96878.4	76767.4	126839	42834.9	42834.9	73791.8	42834.9	79938.4	42834.9
JCHAIN	P01591	1690000	2370000	1170000	662841	16400000	3310000	1820000	8540000	2860000	2190000	2490000	1800000	1780000	3300000	6990000	2260000	2910000	5430000	3680000	2920000	1300000	1830000	1880000	1340000	5780000	2460000	3110000	3060000	4050000	7450000
JUP	P14923	157991	157640	198990	1110000	10500000	287922	157640	172887	253842	220428	303346	490894	213261	147138	216069	138562	362320	395629	256983	207720	364012	504310	190603	166727	3130000	131888	29509.3	54978.3	94817.5	29509.3
KIAA1958	Q8N8K9	2470000	9660000	993603	4560000	2240000	707778	1370000	876186	1270000	1890000	1350000	2390000	2940000	4160000	633832	501806	489308	917958	1030000	1370000	930465	1340000	639812	877621	1220000	418724	724366	809383	1180000	520838
KLKB1	P03952	16700000	20800000	17700000	27700000	25900000	16900000	15800000	12400000	17300000	11800000	9860000	8660000	18200000	17900000	5240000	17100000	13400000	21200000	8680000	10700000	12000000	7830000	12100000	6800000	15200000	7540000	14300000	8560000	9610000	3930000
KMT2D	O14686	1090000	2190000	1650000	1740000	2310000	79371.7	468747	1130000	2170000	6630000	1900000	1360000	1740000	471873	990431	729306	840674	272161	1380000	2420000	3020000	2240000	1940000	2640000	110671	920232	3440000	141196	110671	218635
KNG1	P01042	571000000	527000000	715000000	846000000	670000000	576000000	589000000	435000000	562000000	487000000	333000000	355000000	542000000	481000000	314000000	682000000	542000000	732000000	479000000	358000000	400000000	312000000	553000000	508000000	456000000	408000000	465000000	369000000	315000000	205000000
KPNB1	Q14974	988578	113617	217069	350533	113617	126432	377387	113617	113617	377054	314009	722670	540564	388990	264863	479161	636604	327992	395074	502307	625024	465878	305289	760246	441311	176507	549969	200632	448088	176507
KRT1	P04264	12600000	13800000	30400000	18300000	1780000000	35600000	22800000	15800000	26600000	39100000	36900000	81300000	64800000	20100000	32500000	27200000	62100000	54300000	56500000	29500000	67700000	81800000	25400000	53300000	365000000	27500000	12400000	39500000	19900000	11900000
KRT10	P13645	7980000	11600000	12800000	8650000	295000000	20700000	15800000	10000000	9780000	19900000	13900000	69500000	26600000	14400000	26600000	23700000	49000000	20300000	40100000	13100000	24600000	34100000	17000000	18000000	129000000	18400000	4900000	30800000	7860000	6830000
KRT14	P02533	650412	947015	1090000	1540000	216000000	1870000	4950000	815311	2250000	2660000	2660000	7480000	2790000	943745	3450000	1910000	3580000	2540000	2610000	1270000	4120000	3530000	1520000	2570000	141000000	2910000	792180	1720000	681670	922455
KRT16	P08779	197227	197227	197227	574559	48300000	218554	2670000	197227	440354	197227	373538	1050000	129121	10700000	249090	376090	388416	142629	62525.5	62525.5	488067	213197	200859	200859	36300000	429002	200859	200859	200859	200859
KRT17	Q04695	644111	3350000	186009	227846	3920000	186009	282185	186009	186009	2500000	186009	204811	1010000	63971.2	63971.2	166521	683690	63971.2	321353	63971.2	130961	164274	38522.9	18300000	6150000	38522.9	10200000	38522.9	38522.9	38522.9
KRT18	P05783	9160000	1970000	1130000	478694	11700000	478694	478694	841827	781618	1360000	1020000	4820000	4090000	2430000	1580000	553535	742113	574910	753904	553535	969030	1160000	7100000	2020000	1250000	1940000	930675	1040000	1180000	1090000
KRT2	P02538;P04259;P19013;P35908;P48668;Q01546	2430000	4740000	6200000	3220000	64600000	8900000	3820000	3630000	3620000	8350000	6440000	22800000	7450000	6050000	9460000	7730000	11300000	7400000	14100000	5530000	10500000	13700000	4690000	6110000	15200000	5940000	3010000	9890000	1720000	3380000
KRT5	P13647	502794	927689	1020000	843489	130000000	1600000	2260000	612088	1770000	2340000	2060000	5740000	2490000	963183	3270000	1860000	3840000	2390000	2770000	1470000	3550000	3710000	1420000	1900000	81500000	2190000	716355	1880000	592388	917400
KRT6A	P02538;P04259;P48668	190628	124364	124364	1060000	115000000	577245	4410000	160492	1600000	887400	1700000	1700000	478865	478865	1010000	854295	1400000	498807	1030000	780791	945859	478865	301886	458794	130000000	1090000	603771	792247	510860	163769
KRT7	P08729	424295	119111	94870.7	94870.7	94870.7	113314	158476	210365	199851	94870.7	227683	261960	279944	329611	173716	140296	271822	140296	140296	140296	140296	140296	200830	134367	105405	322838	178925	149821	71424.5	71424.5
KRT78	P12035;P19013;Q3SY84;Q7RTS7;Q86Y46;Q8N1N4	54996.9	54996.9	54996.9	85527.1	2830000	180701	135100	54996.9	92981.7	128003	87972.4	296733	128555	88288.6	88288.6	164937	325691	185537	219443	125320	163627	282628	40935.3	256278	1270000	82250.6	40935.3	148109	40935.3	40935.3
KRT9	P35527	4010000	3950000	18300000	13700000	1240000000	19600000	8760000	6380000	16500000	18800000	19900000	30700000	30200000	8770000	9920000	6670000	19000000	37500000	19300000	16700000	38400000	48700000	6590000	31100000	139000000	16900000	9300000	11100000	9570000	5430000
KRTDAP	P60985	300608	313912	299582	254330	451198	291856	330146	55107	224617	364202	203256	158063	158063	492468	719023	344810	518162	351889	413937	610275	249655	409005	330263	458994	179159	492599	457072	585647	98326.3	387977
LAMB1	P07942	368271	330112	293660	258184	173780	344854	308348	298153	270777	216926	270614	344690	312091	371076	228274	246970	321333	364896	288591	361783	228274	267597	290324	209692	250552	351596	189488	249366	289720	152655
LAMB2	P55268	209365	260384	247957	143648	143648	154099	619803	205191	207259	191329	181146	94644.2	217144	249323	77466.8	168349	77466.8	396818	77466.8	804672	133611	153689	183684	224346	328607	398697	183684	386360	211973	183684
LAMP1	P11279	121253	150398	86490	95598.5	164760	130564	99500	143008	91027.7	104770	113885	131530	168416	167763	62803.7	155631	175323	118883	101031	62803.7	62803.7	62803.7	261369	100219	374195	138979	154240	107696	159963	77132
LBP	P18428	329000000	562000000	843000000	739000000	749000000	682000000	634000000	400000000	585000000	564000000	870000000	217000000	433000000	327000000	458000000	264000000	276000000	311000000	445000000	405000000	467000000	433000000	295000000	371000000	334000000	389000000	465000000	319000000	516000000	624000000
LCA5L	O95447	44405.2	37827.3	96460.8	32512.3	142849	32512.3	47967.6	60383.1	46995.5	32512.3	64227.8	131013	260724	201078	156694	186078	130069	91547.6	308262	361411	291107	206810	327653	243186	25548.6	323514	316862	202479	49342.2	241480
LCAT	P04180	12900000	12800000	9530000	7020000	6130000	12400000	9450000	10500000	8560000	5530000	4280000	12200000	8720000	13400000	3780000	13800000	9210000	14500000	8380000	12500000	8290000	12600000	13300000	5740000	11200000	14800000	6860000	8730000	8210000	8840000
LCP1	P13796	6780000	4040000	6780000	4170000	3820000	5750000	7190000	7610000	8080000	7650000	6370000	2850000	2350000	3550000	852119	3130000	2550000	6720000	3180000	3300000	5720000	5640000	4760000	2060000	4380000	2260000	1830000	1880000	6660000	3400000
LDHA	P00338	372551	211207	167599	371536	544163	260450	257557	271181	196538	146680	662071	405856	347531	333472	592053	432325	433238	197100	248864	177492	435405	278711	335762	419919	1130000	422888	270637	345828	176660	223486
LDHB	P07195	621012	284878	290486	272996	113188	187059	158436	158530	264205	224400	336229	574862	447150	259715	259761	149532	230911	60895.4	163990	60895.4	60895.4	241164	736364	315367	345759	194753	243769	140698	97309.6	97309.6
LECT2	O14960	1030000	876277	1250000	659475	1400000	690221	1180000	1920000	417762	747218	558374	1360000	1560000	836537	1060000	779833	1890000	1210000	1440000	1850000	2100000	567403	1160000	2270000	1590000	1720000	1750000	1690000	242284	825088
LEP	P41159	271302	48620.7	66026.6	48620.7	152214	143559	61618.4	135765	94395.5	48620.7	48620.7	39602.8	86013.4	203238	39602.8	135246	83644.4	86789.1	48032.2	177881	71544.4	39602.8	48269.7	67731	76474.7	76793.9	83657.2	39450.5	39450.5	125284
LFNG	Q8NES3	414863	437135	480121	402783	277153	345125	437838	453203	350456	323899	273836	489429	440779	525525	361140	439597	499489	417233	618238	419916	453208	418107	410575	575069	431169	307909	397291	412024	205943	405709
LGALS1	P09382	647504	440371	476589	552789	404666	435791	648756	461270	475746	380546	436910	372979	553563	568714	455506	308836	424146	315844	411589	352859	558328	327420	659427	464230	508995	660132	434434	555603	218115	273857
LGALS3BP	Q08380	436954	408170	585350	490076	551201	748971	653411	732028	932152	433539	1120000	362951	696401	403263	573536	751321	191751	459336	459558	624954	606332	801484	293404	527249	223817	223817	433608	854400	395632	223817
LIPA	P38571	827218	863235	1140000	928105	589646	1280000	1200000	773344	342781	836828	1290000	507811	956378	481945	484871	700725	645612	444523	993644	739565	392099	453614	536904	888285	346716	1290000	1370000	1050000	897303	888278
LIPC	P11150	752712	1500000	1730000	1520000	2580000	990126	939490	1790000	1860000	1640000	542350	1150000	1380000	616514	817774	1370000	750734	585251	1480000	1140000	1110000	1620000	836033	1090000	1250000	1020000	957043	1570000	1740000	1410000
LIPG	Q9Y5X9	897823	715926	869469	887658	1410000	1020000	719294	968080	1050000	541995	833937	490332	694807	442679	900869	813472	624189	598644	676839	648484	601022	684195	705802	577507	766910	980014	565050	573744	603402	717739
LMAN1	P49257	515136	284304	479562	248954	468028	248954	437875	285412	248954	520945	436919	468852	589830	386380	270353	338264	423607	368538	445807	356064	582963	364031	609897	438439	365156	343452	428724	343452	357007	343452
LMAN2	Q12907	2340000	1450000	3090000	2180000	1400000	1910000	2500000	3130000	1500000	1400000	2240000	2650000	2750000	3270000	2190000	2450000	2330000	3350000	1400000	2320000	1850000	1980000	2640000	2900000	2360000	2670000	2710000	2080000	1090000	1510000
LMNA	P02545	1860000	197339	76556.9	76556.9	459792	351198	76556.9	503646	160749	76556.9	378789	553016	545868	173274	83933.5	164960	297933	267343	83933.5	303325	243380	448090	1130000	242684	520711	428582	242684	242684	242684	242684
LOXL1	Q08397	180220	230059	164019	96660.7	96660.7	214250	96660.7	185174	322790	136909	170903	291517	207114	338397	436424	302284	241946	232829	561525	432643	235101	348411	142198	259190	309788	580059	142198	215826	184566	390233
LPA	P08519	5200000	8530000	6390000	6920000	2570000	18200000	4010000	5850000	6910000	10000000	7000000	2520000	799695	3890000	1900000	6510000	1990000	3620000	5700000	2140000	5600000	2110000	906032	3070000	3280000	867401	89894.5	1440000	927864	6870000
LPL	P06858	358013	519120	262598	141197	460076	622080	194905	541955	741110	566428	447741	329823	168557	941517	650100	389718	496193	576786	664661	577639	443198	646990	682981	617350	239969	1060000	741845	1320000	467494	789853
LRG1	P02750	340178	229733	273869	238792	161079	507438	386387	256836	161079	183318	203406	214860	160552	160552	160552	256670	160552	160552	160552	213696	162257	246675	223355	407101	223355	518418	362571	223355	223355	223355
LRP1	Q07954	217615	73801	180369	73801	206897	139878	154721	127742	268388	232207	172436	262343	458552	228075	109859	234835	230447	311288	213136	215796	307913	224060	267538	251410	170308	131386	169657	303371	176018	110180
LSR	Q86X29	218521	198369	213436	238800	190320	232209	259625	204478	179121	196319	176063	161460	187009	228083	180639	136481	134277	314401	190045	145185	226976	165914	195676	235266	248646	252422	172248	221823	76108.7	422890
LTBP1	Q14766	6090000	381963	1020000	3530000	2020000	2360000	3380000	1970000	330498	801567	2570000	1350000	741661	368779	643981	713804	377434	549039	443242	209083	669006	322947	611416	372233	46586.2	434032	412723	467573	1450000	2280000
LUM	P51884	109000000	65400000	79400000	63900000	108000000	99600000	88800000	72900000	46900000	80100000	60700000	88600000	132000000	118000000	40900000	99900000	123000000	81500000	103000000	58200000	94000000	61000000	142000000	122000000	98200000	111000000	87700000	98900000	75700000	135000000
LY96	Q9Y6Y9	44048.2	19223.7	19223.7	44225.1	21267.4	28864.6	75393.5	19223.7	31301.7	19223.7	23609.8	12127.1	9549.41	9549.41	9549.41	28820.2	9549.41	21532.6	16979.5	9549.41	9549.41	24640.9	52256.9	52256.9	52256.9	52256.9	52256.9	52256.9	52256.9	52256.9
MADCAM1	Q13477	949315	251478	801174	575463	358841	577311	352499	386911	251478	359394	526567	948540	1590000	906890	910558	883067	1080000	1100000	1030000	599254	697333	315005	974019	306430	806019	1080000	2330000	982157	1120000	1530000
MAN1A1	P33908	1670000	2460000	2180000	1820000	2510000	2540000	2480000	2120000	2030000	1610000	2070000	1950000	1670000	1940000	2120000	2140000	2070000	1860000	2530000	1920000	2010000	1400000	1210000	1460000	2020000	2080000	1330000	1870000	1030000	1830000
MAN1B1	Q9UKM7	51367.1	81434.4	51367.1	51367.1	51367.1	51367.1	79825.2	67339.1	51367.1	51367.1	51367.1	69806.7	237886	70675.3	65042.8	108383	70884.4	60367.6	74577.7	62887.6	60010.8	111657	28002.6	28002.6	28002.6	66880.9	28002.6	47527	28002.6	28002.6
MAN1C1	Q9NR34	32900000	23300000	23200000	17200000	26500000	27000000	21500000	22800000	12600000	12000000	11900000	21600000	20600000	22300000	10600000	19000000	20400000	26400000	18000000	19800000	15900000	16600000	16300000	17300000	19200000	28500000	14200000	21300000	14200000	14200000
MAN2A1	Q16706	441872	437785	461828	372665	258384	391865	600347	432527	398033	387080	384114	446915	476183	415010	523990	425529	457326	482857	403073	512238	392288	422209	445720	339269	438341	559602	181779	668876	262570	194901
MAN2A2	P49641	132285	105430	151556	126307	105430	115626	127823	105430	152924	120537	108826	112149	69001.3	69001.3	69001.3	69001.3	108314	128724	146955	104127	144298	69001.3	88770.5	120038	28650.4	42735.1	28650.4	92683.2	78094.3	79625.7
MAP2K2	P36507;Q02750	34966.4	34966.4	34966.4	159851	34966.4	34966.4	43456.6	41635.4	34966.4	34966.4	34966.4	192805	254721	183957	160295	141547	191786	65387.7	253827	65387.7	191309	221449	60804.3	101987	74792.5	61222.3	145694	60804.3	140634	88919.4
MAP2K3	P46734	10	10	10	10	10	10	10	10	10	10	10	226944	74574.7	328205	74574.7	74574.7	121702	124824	74574.7	140114	214982	322572	107229	232449	110071	107229	107229	107229	438140	246453
MAP2K6	P46734;P52564	311007	153042	698528	1110000	153042	153042	401582	349717	459321	153042	555304	146006	146006	2360000	146006	146006	261388	501983	146006	446853	319036	486157	173458	273798	326098	173458	173458	805306	173458	390060
MAPK1	P28482	90183.6	90183.6	90183.6	159498	90183.6	117887	90183.6	90183.6	90183.6	90183.6	90183.6	270803	203009	338010	93658.7	238458	308546	128726	167992	65234.1	327900	204513	193043	177881	173101	111096	111096	111096	224261	122354
MAPK14	Q16539	367636	250460	352135	334511	221494	326830	375207	528048	284122	214088	198488	511463	374100	267197	295327	310919	666933	261152	260972	231223	328242	208120	227728	242245	424416	357460	296778	367191	151331	183758
MAPT	P10636	1130000	2030000	780844	509115	1720000	597406	1190000	875390	364054	298264	298264	933007	1460000	1330000	2280000	2560000	1360000	924876	1240000	924876	924876	924876	1250000	891341	1310000	2330000	1910000	1090000	1930000	2210000
MARCO	Q9UEW3	1870000	539193	523074	373848	628040	290980	879472	828518	480739	535740	767799	525439	434991	695317	259621	422568	303351	726342	303753	450117	415010	259621	332262	314652	475857	383938	440696	493921	397157	602735
MASP1	P48740	11000000	6010000	7090000	7990000	5740000	6270000	5360000	6290000	9350000	10800000	3520000	6900000	6840000	7410000	2570000	5320000	5920000	13100000	6880000	5950000	8640000	7800000	7280000	4090000	6280000	5360000	5700000	3210000	11100000	6240000
MASP2	O00187	29000000	27400000	37200000	27000000	26100000	19100000	48700000	28500000	24500000	18300000	11900000	35500000	66900000	24200000	17600000	21400000	25200000	36300000	25500000	21200000	36400000	16000000	18900000	16300000	25500000	20800000	23200000	15400000	23900000	17900000
MBL2	P11226	74705	63292.4	57454.5	70130.3	51980	106919	128822	61701.6	49494.6	50237.3	47407.3	164976	23015.5	90696.8	23015.5	60435.8	23015.5	42776.5	23015.5	34687.8	56736	59523.3	70038.3	77660.2	156927	18160.3	53475.5	52860.7	62631	18160.3
MDH2	P40926	466922	104603	154896	266761	168530	104603	825531	193578	440282	104603	104603	241209	189988	203852	216952	217773	229059	189988	498003	663337	675811	434386	342678	146426	264703	165440	713165	146426	158958	986492
MENT	Q9BUN1	288166	409536	341670	381437	470819	486642	373455	425643	201801	406942	283992	487450	617503	435697	599320	600610	445430	556891	527932	370072	335920	299096	256378	296983	489098	648682	408181	402805	465151	377820
MFAP4	P55083	570922	394748	311669	311669	592887	496909	932708	435410	666622	466778	360638	584793	726089	892551	491694	1220000	1190000	1310000	1130000	491694	635020	692409	980624	145136	613909	1190000	145136	1340000	178362	145136
MFAP5	Q13361	138528	126092	147082	101179	89711.6	158512	340647	175617	114268	281723	89711.6	386504	143717	207187	80137.2	224409	206300	292557	80137.2	94643.1	356103	203293	123641	306600	436526	477115	123641	251328	649900	355254
MGAT1	P26572	4060000	5160000	4370000	5630000	3940000	5040000	7290000	3730000	4460000	3810000	6070000	3020000	4390000	3890000	4010000	3800000	3640000	3760000	3730000	3820000	3800000	3790000	4010000	4220000	4080000	4550000	4050000	3970000	3080000	4130000
MGAT5	Q09328	525010	609857	565175	638785	569663	751084	654237	740055	565218	495144	377657	728348	831507	831831	413095	772311	830615	608872	788160	572947	644321	686746	731559	634684	580196	1180000	681896	782994	540111	980728
MGP	P08493	3530000	3280000	3230000	2750000	3560000	2210000	1920000	2520000	4150000	5270000	3620000	2710000	3730000	3490000	4650000	2520000	1660000	3480000	2810000	7570000	4790000	4420000	3500000	2600000	4010000	5550000	1690000	3120000	4130000	5220000
MINPP1	Q9UNW1	6500000	5200000	5250000	4330000	4730000	6080000	4090000	5340000	5060000	5840000	4270000	4930000	7530000	4310000	2460000	4700000	5700000	5220000	5270000	4950000	5420000	4600000	6200000	5410000	6320000	4460000	6070000	6840000	4780000	6030000
MMP1	P03956	814857	186130	299342	374036	215269	467341	476828	361310	186130	186130	186130	104366	104366	104366	104366	228193	104366	104366	193936	104366	250841	104366	223226	223226	242830	223226	223226	223226	223226	243032
MMP11	P24347	865966	707455	2160000	942878	923404	707455	881884	795345	1410000	707455	707455	600076	339937	339937	339937	2660000	550138	1970000	610393	339937	1910000	339937	718380	521924	514119	514119	545618	732046	1600000	514119
MMP19	Q99542	1010000	899425	868566	716098	476407	1240000	907444	699133	1070000	837573	1750000	638219	807372	935097	397939	471989	518452	691468	467339	690878	624960	1230000	538107	806138	894350	479449	465214	935956	831087	1370000
MMP2	P08253	6470000	4400000	6050000	3730000	4340000	4490000	5610000	5500000	5650000	5620000	5430000	5040000	3550000	5050000	1180000	6310000	4820000	7060000	5400000	3920000	5230000	6220000	7160000	5940000	4610000	3350000	2490000	5970000	4350000	3910000
MMP3	P08254	797990	1360000	1010000	1280000	367702	729427	1810000	682242	2090000	217849	1180000	2260000	1200000	803986	455993	1280000	884424	797788	843391	670615	2460000	1820000	3570000	1660000	1270000	1800000	669662	4490000	1030000	1550000
MMP9	P14780	614711	806944	1030000	955968	342635	1090000	975389	755611	122890	545673	174524	2290000	2080000	1260000	278321	638712	1440000	1170000	581650	1300000	3060000	1730000	182524	204333	441259	236177	236306	119314	435726	229355
MMRN1	Q13201	3230000	443683	366431	2210000	741168	2360000	1760000	1110000	157450	290532	1000000	955223	528417	384559	492761	502755	361193	358427	365810	291673	407351	291673	439861	373180	128099	338282	218947	424097	622807	3340000
MMRN2	Q9H8L6	2840000	3040000	2310000	2500000	4570000	3140000	2180000	2200000	3590000	3320000	2520000	2810000	4320000	4060000	2590000	3170000	3480000	3550000	5070000	2140000	2330000	2460000	3490000	3830000	2250000	3610000	3080000	4730000	3440000	3170000
MPO	P05164	356536	509642	531718	640760	581670	576703	480796	903751	459513	583330	847251	332240	659739	1140000	1350000	668179	811724	491662	818886	1170000	1130000	953257	437652	819321	470389	1340000	364369	1410000	332063	2200000
MRC1	P22897	379751	369454	183138	183138	2570000	359919	456284	259068	273788	213102	183138	843659	2940000	127421	1710000	437297	178530	170281	127421	195811	127421	127421	1670000	5530000	120858	120858	5380000	120858	120858	120858
MST1	P26927	383310	522640	416487	478888	415911	448238	620021	607103	604100	493819	348133	467109	377648	328090	473221	427559	482181	551339	456782	441752	460639	208632	629082	621778	602692	876098	289554	487942	420871	388291
MTHFD1	P11586	146235	256060	156513	265381	170943	188481	232366	163455	146235	146235	146235	791112	680566	442712	320041	262923	428232	319632	482056	337296	574347	532851	388653	592815	390208	359791	613765	357123	555405	165658
MYOC	Q99972	245684	151057	190125	263435	151057	151057	232146	151057	217769	198497	151057	378498	273366	505370	213575	290392	392042	265633	294112	166120	548604	290223	444976	489470	299151	299714	309210	308169	299151	299151
MYOF	Q9NZM1	620142	1360000	530000	329412	231946	2550000	585007	1140000	231946	985404	379348	1020000	599390	445417	445417	445417	445417	1440000	445417	1430000	445417	1220000	1970000	114720	114720	114720	1900000	3190000	114720	114720
NAA15	Q9BXJ9	1730000	1250000	985370	3490000	1870000	1370000	901128	1290000	1690000	1620000	2130000	2190000	1940000	1680000	3550000	1650000	1750000	1030000	1760000	2160000	2610000	2870000	1450000	1400000	1470000	1660000	1670000	2110000	1400000	1670000
NAMPT	P43490	427799	612078	458816	1170000	917746	473887	639425	525504	500826	654188	505169	2470000	1850000	899234	1230000	942510	3320000	772159	923654	1040000	1930000	974428	395633	1150000	724545	985487	1160000	909841	964899	559060
NAPA	P54920	643687	1160000	931537	2030000	284504	598250	910587	574681	415142	1220000	284504	3650000	2200000	2620000	1450000	992784	2160000	1330000	2410000	1900000	3100000	2580000	1390000	2780000	1590000	765326	2270000	1320000	3060000	954262
NCL	P19338	4280000	586578	623192	136533	92470.5	92470.5	309702	266346	92470.5	92470.5	110603	3520000	2580000	554326	126114	318937	506215	126114	210545	126114	126114	126114	3390000	891935	357383	401627	397881	400247	357383	357383
NDUFS1	P28331	228587	112713	112713	112713	112713	112713	112713	112713	112713	112713	112713	358454	572571	133951	169308	47250.3	116701	160244	47250.3	47250.3	47250.3	291095	411855	203854	93993.2	93993.2	93993.2	126053	93993.2	93993.2
NID1	P14543	1080000	372609	735910	769382	814927	812446	1500000	717598	648643	562954	787139	461552	424430	257803	491667	513460	310471	532562	529054	447400	645467	706940	469053	683236	796791	494598	506158	952779	427364	439984
NIF3L1	Q9GZT8	688592	437645	720637	564661	1170000	955804	415459	735423	459741	473901	814834	1010000	1150000	677448	519336	659197	1320000	630722	1180000	519336	1050000	679387	527410	424383	599912	788706	466698	777911	370635	247225
NOC3L	Q8WTT2	1480000	2230000	1230000	1930000	1220000	2180000	805294	1530000	1130000	947930	795654	2140000	2700000	2710000	1320000	1760000	2110000	1730000	1320000	1810000	1460000	1650000	2230000	2200000	2180000	672314	1990000	2320000	672314	1040000
NOTCH3	Q9UM47	142153	139616	90358	81121.5	108405	156712	163949	152452	74489.7	79770.7	91698	131189	179611	130720	268108	331518	317758	213476	210123	116677	203509	92456.7	342602	276437	208295	532669	186854	323022	126485	289284
NOTUM	Q6P988	708380	985553	589591	322837	797672	795107	240226	1040000	1370000	823272	711316	770165	1230000	1090000	1200000	1550000	826443	2460000	960164	647500	779330	921680	1150000	1200000	901676	262500	1060000	1700000	760584	638384
NPEPPS	P55786	44571.1	37752.4	97899.5	108738	152655	67580.9	223970	189019	72287.8	70958.9	37752.4	346256	296751	96177.1	96177.1	176643	330769	96177.1	197904	96177.1	291297	166672	40050.8	40050.8	196773	379367	138634	100438	40050.8	403507
NPM1	P06748	3610000	1490000	745793	923030	780772	676111	199162	593820	172923	341339	172923	1590000	2160000	1910000	1460000	928455	1800000	362056	209810	436281	391385	350641	1850000	1420000	1350000	709010	1000000	941452	493858	164996
NPNT	Q6UXI9	635379	781800	924879	430369	628190	672316	580032	832460	389057	448239	391248	786025	1320000	1210000	539366	649302	1310000	559631	872377	548843	543540	539366	509452	763488	1250000	1380000	731939	697520	411135	360896
NRP1	O14786	507201	449928	509771	336979	315151	228734	490304	445693	370838	521025	431663	445257	388135	385147	148823	204517	337050	453782	273041	365267	210907	299915	334592	378048	241336	360761	248575	325122	67553.7	67553.7
NRP2	O60462	711834	475994	663436	455932	384205	564562	639966	676156	523188	485069	472972	595005	518339	539273	268235	541161	471278	697766	527289	583457	503082	555871	455449	525207	481906	456812	473655	454416	399982	230571
NSF	P46459	132849	386857	190530	557033	42771	206725	619130	205947	277320	259577	74743.9	1420000	771082	808013	844116	487614	994561	559844	767111	766591	1030000	818273	471355	1240000	560688	540497	961174	441041	883738	256170
NUCB1	Q02818	570190	162230	162230	162230	162230	162230	354874	162230	162230	266957	408784	168186	168186	168186	168186	168186	168186	305138	172879	174200	175853	171741	212444	137180	123522	117809	117809	117809	201263	144453
NUCB2	P80303	178873	108567	108567	182682	108567	158134	168721	150814	108567	112608	141474	84115.5	84115.5	84115.5	84115.5	84115.5	84115.5	95913.5	84115.5	84115.5	88139.9	84115.5	34355	34355	34355	34355	34355	34355	53237.5	34355
NUP188	Q5SRE5	374270	380372	658999	597357	645044	797159	1010000	593338	710472	416325	532896	461456	387894	350054	1330000	428428	618594	610072	708356	993149	634975	763392	395613	708681	403169	875522	1030000	744826	63808.6	101359
OAF	Q86UD1	7290000	9450000	10600000	11100000	8730000	9070000	9480000	9600000	9390000	10400000	9460000	6910000	8000000	7970000	7750000	11400000	7750000	9210000	10600000	5320000	9500000	9390000	10500000	12100000	8400000	9530000	9660000	10800000	7120000	8280000
OGN	P20774	40840.4	40840.4	40840.4	40840.4	40840.4	54446.6	40840.4	40840.4	40840.4	40840.4	40840.4	28361.6	28361.6	28361.6	28361.6	73784.3	75598.8	51483.1	28361.6	28361.6	71521.3	28361.6	77509.7	249272	41567.7	102856	111035	113908	41567.7	41567.7
OIT3	Q8WWZ8	2190000	1770000	3680000	1940000	2090000	2010000	2660000	2020000	1390000	2160000	2430000	1620000	1680000	1480000	595107	1800000	1980000	1670000	1750000	1260000	2730000	1260000	2170000	1500000	2170000	1680000	1040000	1810000	1630000	1370000
OLFM1	Q99784	1680000	685213	2110000	829420	1370000	1260000	1300000	965367	1670000	1250000	1500000	1500000	1120000	811120	809044	1190000	950020	1800000	1300000	1260000	1020000	1390000	879518	1020000	1050000	706175	974666	1080000	1120000	1140000
OLFM2	O95897	285359	315021	656812	854707	217068	442865	738868	208511	420510	729908	557276	499735	843831	237330	251564	749918	589228	1980000	473735	453191	626309	601628	3160000	1050000	786719	280981	2580000	729485	936791	411101
OLFML3	Q9NRN5	394518	223471	252617	249281	223471	419718	435526	328087	342720	789178	447947	217151	214236	192617	192617	412621	380675	475457	234583	421148	325525	333321	406461	379385	404918	627366	278462	375394	208184	262441
OPTN	Q96CV9	1800000	168162	735533	168162	1360000	168162	168162	168162	168162	295845	222844	5760000	6840000	492151	220650	220650	315456	220650	4590000	1060000	1210000	220650	7520000	7350000	61295.2	639067	5210000	387318	61295.2	323218
ORM1	P02763	331634	403964	337248	442249	1540000	981813	1380000	303936	842414	650903	2500000	313221	199088	332458	673659	456556	390851	245156	412531	740329	633515	743352	905239	981873	625639	372719	477821	188670	669861	924517
ORM2	P02763;P19652	4660000	5020000	10000000	13100000	7520000	11500000	9960000	5140000	3590000	8290000	7640000	4230000	3230000	5510000	5220000	6230000	5130000	2480000	4260000	4900000	4260000	4070000	9200000	4900000	5660000	3850000	6080000	1960000	9050000	11000000
OXCT1	P55809	940382	241800	275485	116434	93630.6	104070	93630.6	126604	93630.6	93630.6	93630.6	1050000	855830	221564	329775	173899	282110	173899	173899	173899	173899	173899	1090000	336982	157331	274846	217066	256655	157331	157331
OXSR1	O95747	77899.5	193244	127577	267186	11097.6	197325	315607	157931	38358.6	134253	11097.6	706633	571346	419517	243312	392962	627099	238818	456309	249953	488393	306519	198303	673153	252537	160691	306950	187196	269911	88192.3
P4HB	P07237	304724	200670	284573	263789	225231	188637	436943	340129	342094	177453	362172	313858	220939	248304	168793	258353	192360	249323	193268	251280	606708	257113	291622	187504	319290	262517	143197	184485	186508	114262
PABPC1	P11940;Q9H361	124821	102892	111648	129770	81056	150143	167935	236352	121650	113340	124492	172607	117855	99873.1	81380	110214	113215	97284.5	99157	81380	144184	130783	84818.3	87614.6	185586	78782.7	52587.4	177007	76256.6	52587.4
PAM	P19021	292112	308244	284850	385129	289771	392898	346900	321099	334465	414284	314994	484982	361787	383945	648745	364412	433497	529739	388540	573196	563312	471928	359239	300079	283094	473471	455188	458707	496338	392467
PARVB	Q9HBI1	467528	219896	347780	358102	184541	384000	1350000	615137	184541	184541	184541	625411	132111	91907.1	210202	91907.1	351467	169858	819647	238371	271221	242700	83473.3	83473.3	508200	83473.3	279827	265081	83473.3	83473.3
PCBP1	Q15365	238264	124026	53214.7	300814	280022	101530	157670	71761.6	53214.7	160466	53214.7	497824	301250	345279	119682	189282	368003	183314	119682	119682	302667	268236	258572	220373	322119	94918.4	220691	94918.4	170531	94918.4
PCBP2	Q15366	398112	158405	169478	74505.5	46878.9	46878.9	66307.9	82706.2	46878.9	46878.9	46878.9	428373	569470	133969	195410	111961	181832	31878.8	62986.4	31878.8	31878.8	31878.8	505719	165938	140633	124791	124791	124791	431847	124791
PCDH1	Q08174	753573	602746	461140	632140	482163	416284	448917	432992	673361	732976	648551	412484	667513	425774	434650	324452	323621	554963	457286	404327	623533	542366	709355	428464	500707	319244	330982	458439	554101	447084
PCDH12	O14917;Q9NPG4	614781	586396	526341	318173	461649	402856	576764	335873	356296	250610	427092	517201	574872	677780	230227	379405	622314	819238	386825	413936	395639	677389	561250	438807	337410	674657	331450	629779	517740	624714
PCDH18	Q9HCL0	191456	113411	104323	96781.2	139372	131916	155780	117712	176427	184623	106109	145890	122026	202698	122026	122026	194616	201022	176283	150652	146741	170234	160622	109670	167871	163760	111608	127170	147087	124291
PCDHGC3	Q9UN70	263842	173775	211420	209925	151092	223899	384126	229721	158694	99060.6	244164	353903	141593	433117	107837	400631	194096	345095	216724	321550	153796	422704	490913	542312	376552	431219	180788	272113	414368	334334
PCOLCE	Q15113	1810000	1340000	1340000	1200000	1390000	1250000	1610000	1380000	784765	2140000	1090000	1600000	3690000	1460000	1340000	1750000	1950000	2160000	1930000	2340000	1910000	1330000	1580000	1410000	1460000	1970000	976700	1470000	4530000	4250000
PCOLCE2	Q9UKZ9	1240000	1200000	1190000	861129	785248	1100000	1180000	1110000	1080000	975324	546117	1700000	1090000	1440000	618933	1020000	1210000	991325	1240000	893032	776945	964141	1130000	880972	1190000	1430000	603851	940693	953454	680116
PCSK6	P29122	954711	461370	566627	650193	290388	571001	688010	421673	432974	385483	668152	288243	335123	311554	127726	384898	241851	275645	254269	259879	312494	379622	507587	541828	640972	336721	234421	473144	666578	742192
PCSK9	Q8NBP7	736618	849415	975441	994347	1380000	1510000	1100000	1610000	1510000	1210000	1270000	1050000	1500000	1690000	1140000	1890000	1140000	1180000	1460000	1850000	1260000	1820000	1150000	1570000	1310000	947341	980811	1750000	1410000	1670000
PCYOX1	Q9UHG3	10800000	10600000	7540000	14600000	13000000	11200000	6840000	9610000	12700000	11500000	6820000	15100000	10100000	13900000	21500000	19200000	9460000	22400000	13900000	15400000	8230000	17800000	13100000	7990000	10400000	15100000	13100000	13200000	14400000	18800000
PDCD6	O75340	840948	1030000	1190000	845833	1950000	1520000	877848	1300000	946806	684142	1110000	1130000	804775	1070000	634888	857917	1270000	898756	1020000	690018	815808	764358	956030	1050000	1240000	1100000	945485	960302	573902	763479
PDCD6IP	O75340	20356.6	20356.6	20356.6	20356.6	37192	27082.3	26967.3	34846.7	20356.6	20356.6	20356.6	130010	30986.6	30986.6	71938.5	44667.8	79720.5	47802.5	39246.4	30986.6	72146.8	30986.6	28001.9	145021	65598	13903.5	98854.6	82192.4	13903.5	183802
PDGFC	Q9NRA1	675883	636475	751443	752094	452332	705518	670370	637267	514638	589669	546111	586511	356398	639436	624980	604026	871246	568109	562242	443752	387917	598853	582641	627251	499659	1050000	578371	647885	599555	599595
PDIA3	P30101	445450	474413	260748	246774	235891	235891	446401	399547	320035	300003	345956	538888	376256	180338	413566	407745	218228	272158	298085	322184	422943	280154	412210	366652	244042	225720	205423	333286	279057	246180
PDIA6	Q15084	651251	331889	394150	313329	404586	205739	401410	305966	399927	368696	436027	423093	315954	239799	393771	299156	346256	313299	310550	468112	445121	361189	425440	332783	297228	250037	238602	235239	198502	305413
PDXP	Q96GD0	25340.4	25340.4	42765.9	95230.8	33462.7	89433.3	25340.4	41515.1	25340.4	86090.3	25340.4	177758	147222	106817	78234.9	91983.6	92579.8	67918.9	113340	67918.9	202362	73316.7	36655.8	36655.8	45340.2	36655.8	81997.9	83158.2	129772	36655.8
PF4	P02776;P10720	61100000	7430000	1430000	58200000	1520000	38800000	46000000	22300000	3340000	10800000	37200000	18700000	13800000	13900000	10300000	19800000	10500000	8890000	7530000	5050000	16700000	4170000	14200000	10900000	1580000	8160000	6160000	8450000	15900000	44800000
PF4V1	P10720	999232	103654	103654	1610000	103654	600379	902772	761566	103654	393765	704157	379381	676996	514742	165316	416784	189695	230280	241792	261487	747043	228035	438530	282057	187489	187489	228245	262256	389719	1600000
PFKL	P17858;Q01813	191046	137400	137400	268551	137400	137400	137400	137400	137400	137400	137400	571160	624374	49030.6	706225	427573	289987	49030.6	245990	181480	440563	253262	211436	695193	316690	211436	1040000	211436	211436	211436
PFKM	P08237	207073	207073	207073	335206	207073	267473	423360	256885	220036	207073	571278	949352	451041	612214	719580	444642	534674	541606	612247	413658	793986	552360	878189	937208	648457	468771	794023	480627	664873	171410
PGD	P52209	483997	703923	329612	387104	473321	338234	330794	463097	393540	357084	254364	520211	513933	603073	224045	340557	677678	351872	567062	224045	439144	224045	645978	408304	446453	362803	307782	398893	307983	513911
PGLYRP2	Q96PD5	4590000	4410000	5860000	2560000	2600000	6810000	3070000	4800000	2080000	1680000	2320000	6390000	4730000	4720000	6280000	5550000	15200000	14000000	10400000	4170000	7720000	3930000	1950000	6190000	1430000	2840000	2820000	4110000	1360000	5290000
PGM1	P36871	539123	345727	500952	445810	416225	365100	476789	474736	363403	408247	345727	523738	1000000	425232	455541	468341	865512	304766	434283	411590	537457	304766	387184	571200	318464	212515	693938	331014	274600	344043
PGM2L1	Q6PCE3	113791	319197	196784	506621	95171.9	266016	485365	307056	95171.9	224330	95171.9	1200000	866107	811398	708738	480550	1100000	377134	656322	508404	653571	640856	330153	874297	291643	346349	677939	360383	333559	196315
PHB1	P35232	5020000	2490000	1800000	1090000	503096	662655	516862	513586	2640000	399650	399650	5080000	5650000	1860000	1970000	752441	2060000	388403	535827	287306	196749	196749	5110000	1680000	1000000	1250000	761611	651523	167428	167428
PIBF1	Q8WXW3	22000000	16000000	3170000	14400000	15100000	2630000	17800000	2750000	26400000	2690000	2130000	4190000	2050000	2390000	2700000	2260000	2060000	2820000	2620000	2350000	2640000	3080000	3220000	2050000	2990000	3600000	2410000	26000000	2050000	3040000
PINLYP	A6NC86	7190000	3880000	3880000	3970000	6070000	5200000	6890000	3880000	4790000	5530000	4410000	2350000	2350000	2350000	5340000	3190000	2350000	4440000	4790000	3720000	3260000	6780000	5380000	3390000	3390000	5610000	3390000	5510000	8250000	6830000
PITPNA	Q00169	135001	135001	270649	344642	135001	193966	245502	346373	246569	225595	231605	566122	461154	376148	181533	268782	487362	335518	422118	384469	502792	392861	250699	338720	234120	142446	383061	467468	284772	142446
PITPNB	P48739	189372	121690	342948	429025	255064	288882	471145	121690	121690	184365	121690	968322	881123	740308	640515	509214	972540	410196	704405	631176	885505	826528	253377	737158	633813	394445	820721	431378	726993	323884
PKDCC	Q504Y2	727390	751204	656898	469435	2470000	712644	693574	593602	444793	449774	757327	632394	903266	763806	373925	802548	797294	765517	727017	484872	583429	598327	1060000	821301	682719	630632	484880	1070000	530348	683808
PKLR	P30613	429764	708882	445319	953093	429764	670027	666353	512541	438644	600869	429764	2600000	1460000	1790000	338170	1000000	1480000	867845	1000000	878815	2210000	1580000	613856	1980000	734940	463410	1080000	709888	1870000	348124
PKM	P14618	2340000	1550000	1730000	1480000	2710000	1440000	2070000	1850000	1770000	1870000	1390000	2640000	1820000	1700000	1360000	1590000	2530000	1740000	1840000	1550000	2010000	1900000	2000000	1130000	2820000	1320000	1140000	1280000	1910000	1760000
PLA1A	Q53H76	477369	720830	945653	871221	439812	590236	872862	607632	558408	442756	674794	570093	411378	279772	423812	370871	416214	259233	386665	759585	306467	434283	537939	437255	614324	391607	365273	743384	365273	409729
PLA2G12B	Q9BX93	333509	296270	475874	749040	925978	477284	252811	510635	358782	668908	145609	331199	503003	179702	573816	469351	343539	550128	591548	303973	325620	179702	363205	371064	403566	528321	768019	577607	488539	437518
PLA2G7	Q13093	776791	1500000	748553	2060000	1930000	1220000	631473	1510000	1080000	1420000	1480000	1700000	1180000	1040000	1990000	1130000	1190000	871308	2110000	1070000	1160000	1530000	1380000	1950000	1530000	1530000	4830000	1650000	2750000	3330000
PLCH1	Q4KWH8	427424	561309	510494	434009	167826	167826	205968	270200	1600000	1680000	866671	585276	529280	462173	266728	275426	266728	407379	667977	2080000	2100000	1920000	737283	669485	365314	196178	422858	296016	674802	544606
PLD4	Q96BZ4	440991	488892	310994	301685	460926	298623	409163	439739	298623	514375	298623	299364	301938	591579	450493	390223	248975	774479	546428	392326	190458	388283	338757	466662	341031	476397	556048	260891	247036	995536
PLEC	Q15149	579939	269760	261507	36759.2	360696	36759.2	105564	183421	68752.2	119998	36759.2	430161	974084	413220	437399	131752	313527	225699	200330	131752	131752	131752	978667	801679	590063	128495	283032	179803	128495	128495
PLG	P00747;Q02325;Q15195	5590000	6980000	6170000	6730000	9080000	8690000	7050000	6240000	8470000	10400000	6070000	7080000	6260000	7660000	11100000	6970000	5820000	7620000	7770000	12300000	12000000	10700000	7130000	7150000	6350000	7430000	7000000	8870000	12100000	10700000
PLIN3	O60664	293829	272062	215906	209455	302254	211589	108973	335117	222077	212496	266700	361247	388210	216088	439378	262368	348740	250014	311785	278794	342498	287826	308878	289293	258840	204571	273956	177049	296260	501313
PLIN4	Q96Q06	303712	65524.1	85417.1	145946	159599	65524.1	107311	130352	65524.1	65524.1	65524.1	219728	90713.6	125838	90713.6	94989.2	103015	90713.6	520562	90713.6	521239	96074.4	203120	108052	160583	67797.8	67797.8	76954.8	67797.8	122171
PLS1	Q14651	1190000	371148	845494	585012	681421	357314	645571	1190000	692285	839707	808534	778740	1490000	671675	173554	441086	500993	514704	506247	148367	741001	473342	818250	819242	269172	1050000	626740	549238	624687	269172
PLTP	P55058	136000000	144000000	117000000	109000000	117000000	141000000	129000000	68500000	131000000	129000000	180000000	126000000	122000000	134000000	127000000	158000000	136000000	182000000	142000000	177000000	146000000	195000000	171000000	121000000	109000000	145000000	149000000	150000000	154000000	196000000
PLXDC2	Q6UX71	1340000	1390000	1070000	746583	782728	1800000	657874	969613	1240000	1340000	1040000	1150000	1170000	1140000	762561	1230000	1150000	1490000	1050000	930008	1020000	1120000	1110000	1200000	1150000	1220000	1010000	1300000	1260000	1000000
PLXNB1	O43157	421788	416848	335126	400093	389980	375693	493021	418411	324585	588307	308523	290121	271494	268840	256050	449118	311655	426113	411036	443138	545205	653064	481177	387646	693395	227587	304294	207183	532754	502515
PLXNB2	O15031	381398	386482	370404	321964	257903	555865	456310	398934	306949	492513	481763	357611	329920	384405	324406	404567	326025	723433	394606	354596	389610	324406	582114	597725	424535	526103	308395	655919	491255	253048
PODXL	O00592	2280000	1320000	1560000	1020000	574922	2140000	1050000	1660000	1310000	1070000	1040000	1970000	1100000	1100000	598724	1050000	1350000	1980000	844518	1250000	1090000	1450000	1600000	974819	1390000	995659	1210000	882442	1240000	633982
PON1	P27169	1350000000	2790000000	1690000000	2930000000	1980000000	2270000000	1270000000	1870000000	1590000000	2010000000	1240000000	2210000000	2310000000	3100000000	2170000000	2560000000	3100000000	3270000000	2710000000	2600000000	2480000000	2720000000	2490000000	2440000000	2620000000	2580000000	2560000000	2010000000	2170000000	2200000000
PON3	Q15166	102000000	166000000	81000000	123000000	172000000	145000000	73000000	150000000	109000000	149000000	83300000	166000000	113000000	170000000	186000000	197000000	162000000	162000000	215000000	225000000	168000000	202000000	147000000	117000000	97300000	170000000	138000000	110000000	86400000	180000000
POR	P16435	336109	1180000	651610	730843	635697	421695	703551	825930	533425	1050000	384457	565950	1410000	1600000	133971	557788	934444	647947	559138	1010000	1190000	1080000	275366	313098	635416	733851	328174	842453	443577	1390000
POSTN	Q15063	622113	798482	993888	749464	698307	741427	522779	520333	707672	1120000	1110000	873423	546931	526610	730845	602074	1330000	1230000	1260000	816894	1080000	1150000	755523	617778	1130000	558094	345068	736552	1260000	748248
PPBP	P02775	739284	135457	135457	644001	245358	585040	576163	365531	135457	135457	659939	309739	148803	109720	250247	228979	54745.4	87965.9	102767	54745.4	224955	95772.3	179071	86133	68983	68983	68983	68983	132231	246162
PPIA	P62937	173173	22630.4	22630.4	22630.4	936612	92391.3	50866	64874.9	94709.6	23538.3	22630.4	53432.1	40588.3	40588.3	40588.3	40588.3	40588.3	40588.3	40588.3	40588.3	46793.4	49265.5	83512.8	35888.7	40417.9	35888.7	35888.7	40643	35888.7	40646.9
PPM1A	P35813	388892	161290	306785	313611	234286	267086	331968	346934	325295	414775	306224	462683	274307	280255	210096	325527	317466	310521	292924	388199	558511	500105	226663	177212	320289	228541	231409	199255	350397	245802
PPM1B	O75688	163817	82288	82288	133212	82288	166035	82288	210815	228235	215795	130631	227588	188993	108693	108693	121718	220442	155855	108693	195485	286564	108693	226782	276930	233979	93783.1	163564	93783.1	152698	93783.1
PPP2CA	P62714;P67775	91913.1	359961	154450	301892	91913.1	197373	317889	143611	91913.1	214262	91913.1	485138	419163	203558	225669	185252	357768	156569	268644	228591	624062	182564	77005.7	95966	77005.7	77005.7	177202	77005.7	116193	77005.7
PPP2R1A	P30153;P30154	397781	598539	542771	1160000	189152	532106	809562	461854	189152	614046	256396	1700000	1890000	1300000	2580000	1180000	1480000	962886	1460000	943297	1960000	1280000	766627	2150000	596829	799177	1830000	791916	1380000	405779
PPP2R1B	P30154	135544	135544	135544	198154	135544	135544	165763	135544	135544	135544	135544	478262	356150	223477	79926	79926	286025	79926	172625	383539	448922	309117	95945	297607	120510	95945	235969	95945	242950	95945
PPP3CA	P16298;P48454;Q08209	367898	367898	514792	431190	367898	367898	413796	529270	707156	413709	430849	716496	121608	177685	121608	121608	762584	410537	192116	484470	556606	121608	319400	421768	594357	131936	131936	131936	342482	190361
PPP3R1	P63098	61684.5	73169.2	100170	50991.7	31731.4	31731.4	68076	90763	93212.4	45493.3	71031.2	62223.2	22282	71975.5	22282	32395.4	35138.6	64452.7	22282	48966.8	34430.9	22282	51127.3	67020.5	71296.8	70542.4	45136.9	45136.9	45136.9	63990.9
PRDM8	Q9NQV8	1710000	2640000	1300000	2080000	995310	1980000	2010000	2570000	1540000	509908	562953	2500000	1910000	1680000	7360000	3160000	5250000	1740000	2990000	1710000	1200000	1490000	1710000	1600000	1170000	3230000	1160000	2820000	1160000	1160000
PRDX1	Q06830	1280000	110786	136681	85726.1	1580000	185393	133449	90432.4	164089	99481.9	73691.2	369547	212024	182422	203827	193124	261941	138715	158800	104580	372812	115834	164565	220595	620150	206805	174851	186471	164565	164565
PRDX2	P32119	1050000	2630000	999590	4610000	3660000	2220000	2050000	746176	448288	1010000	313262	11400000	5590000	4180000	6550000	4430000	4480000	3380000	4300000	1890000	2440000	1960000	2150000	9670000	4090000	1770000	4990000	2480000	1280000	956447
PRDX5	P30044	1170000	480589	127884	127884	127884	127884	127884	127884	222767	134612	127884	729566	628409	283009	421017	125313	266743	354448	125313	125313	206130	125313	680420	325134	72325.6	72325.6	269203	72325.6	72325.6	72325.6
PRDX6	P30041	1340000	1880000	1830000	2780000	1260000	1360000	2350000	1510000	760453	1610000	992844	3730000	1640000	2680000	2120000	1530000	1830000	2340000	1970000	1500000	2140000	2990000	3840000	2780000	3440000	1660000	4550000	2320000	1090000	895985
PRG2	P13727	245644	67229.1	133646	172138	228486	161904	167954	243980	67229.1	150908	175401	164128	89179.5	89179.5	89179.5	105897	154290	215208	177494	170373	133090	89179.5	141591	141591	143051	174117	212093	190285	141591	141591
PRG4	Q92954	693439	1290000	845622	1600000	911710	1710000	1050000	800021	681782	824236	600851	613101	992740	413090	1210000	908963	764574	450664	481332	625032	668757	347819	850513	647872	1110000	928657	1070000	1320000	754228	3010000
PRKDC	P78527	514406	156463	101647	68712.2	213873	68712.2	654650	68712.2	68712.2	69809.6	299055	287034	243086	180137	178261	87244.3	110759	87244.3	274815	87244.3	172899	311951	423410	154790	134800	104692	104692	104692	104692	104692
PRL	P01236	236119	525197	247885	208744	830031	199282	214624	279493	257966	321760	145977	72793.9	72793.9	72793.9	426213	201203	72793.9	72793.9	353116	72793.9	72793.9	97135.5	89088.4	89088.4	89088.4	354319	331544	89088.4	89088.4	89088.4
PROC	P04070	1230000	1770000	1150000	1050000	992426	1630000	954146	1030000	758097	495927	492561	1170000	1330000	1140000	1410000	1370000	1050000	882608	1000000	1180000	722427	1090000	805342	676001	1100000	897815	619331	869467	542007	884817
PROCR	Q9UNN8	171145	74640.6	184120	153623	167864	170907	205656	196980	159832	105658	74640.6	549697	356537	324542	340888	226566	268240	184290	203442	187650	153074	95243.4	180381	136153	201528	441361	377532	358190	107585	236275
PROS1	P07225	12500000	17700000	20800000	18600000	11800000	17300000	13900000	9180000	13400000	15200000	16100000	26100000	24600000	14400000	16900000	20500000	25000000	16800000	17800000	19600000	25200000	20600000	16500000	16400000	20100000	15300000	17400000	19800000	18600000	23000000
PRPS1	P60891	474918	1090000	666846	1950000	591570	641836	1250000	716568	743877	1410000	474918	4520000	3720000	2320000	2250000	1140000	2460000	1380000	2600000	1340000	3920000	2470000	1710000	1600000	1060000	509776	3240000	1170000	3230000	1120000
PRR36	Q9H6K5	3780000	2420000	1320000	1940000	1990000	2440000	2170000	2880000	1660000	422819	1510000	6120000	2030000	3670000	3150000	2680000	2310000	3360000	2980000	1260000	1970000	2470000	3830000	1530000	3280000	3930000	1930000	3850000	391618	391618
PRSS1	P07477;P07478;Q8NHM4	153000000	203000000	210000000	167000000	518000000	117000000	99400000	119000000	178000000	224000000	97700000	195000000	251000000	271000000	232000000	164000000	165000000	161000000	329000000	204000000	155000000	252000000	269000000	205000000	132000000	213000000	227000000	172000000	103000000	138000000
PRSS3	P35030	1820000	1450000	1800000	1550000	3300000	879018	817446	839351	1720000	2850000	1250000	1530000	1470000	1120000	2410000	1360000	1110000	1710000	2210000	1580000	1500000	990984	2100000	1610000	1490000	1480000	2060000	2040000	728744	314024
PSAP	P07602	273624	271898	217587	265152	322578	281896	321396	258030	111271	111271	215062	314234	411834	155335	182595	384781	240023	318692	273904	199238	155335	185018	263496	229814	232645	279819	361477	454482	67489.9	295588
PSMA1	P25786	50085.7	50085.7	77598.3	219450	405792	86758.4	50085.7	50085.7	50085.7	50085.7	50085.7	417775	585018	392177	332609	313537	423184	201882	348597	203048	362699	201882	166913	459643	319810	172120	228238	181505	166913	166913
PSMC2	P35998	734951	168976	38767	96078.3	38767	58986.3	73832.6	51273.5	38767	87224.6	38767	458893	291707	222420	155542	182181	271758	126114	189957	143953	266299	138908	136890	362203	159462	102654	266858	86175.9	227489	76307.3
PSMC3	P17980	35346.6	46292	35346.6	35346.6	35346.6	35346.6	35346.6	35346.6	35346.6	51379.1	35346.6	298614	168681	131305	43963.6	136192	43963.6	43963.6	149674	61655.5	237822	84468.2	111871	272671	82116.3	82116.3	149278	82116.3	128879	82116.3
PSMC5	P62195	147715	36878.1	12010	48360.3	12010	28130.5	12010	12010	12010	12010	12010	153398	74521.8	76574.2	24241.6	63505.1	75377.9	33492.9	61687.8	25513	103937	90355.4	69618.8	43001.8	41388.4	36796.2	37075.1	41371.4	107065	36796.2
PSMC6	P62333	347767	25542.8	25542.8	60797.9	25542.8	25542.8	25542.8	25974	25542.8	25542.8	25542.8	121677	32501	84530.7	32501	86903.9	65952.4	38750.3	32501	32501	118494	54344.6	24777.1	84365.9	40535.4	24777.1	24777.1	24777.1	24777.1	24777.1
PSMD10	O75832	87960.7	166079	98215.2	215372	137019	112177	209615	112728	75107.6	75107.6	75107.6	407382	347369	267511	342451	208179	469803	158273	284894	108811	230496	169392	146629	220755	184420	139135	296385	195226	139135	139135
PSMD12	O00232	701478	86168.6	86168.6	86168.6	86168.6	86168.6	86168.6	86168.6	86168.6	86168.6	86168.6	264947	184115	196563	85306	85306	137013	120430	85306	307847	125633	183278	47354.5	218424	47354.5	47354.5	173538	47354.5	140690	47354.5
PSMD2	Q13200	131452	23305.9	10872.9	40696.2	10872.9	23751.2	59841.8	10872.9	10872.9	10872.9	10872.9	172144	101327	70759.3	37797.8	60840	75381	46243.8	51474.3	55202.2	109469	65341.7	133647	68886.4	48002.7	27368.1	59163.9	45722.7	198155	27368.1
PSMD5	Q16401	187648	322133	265333	364039	155637	277501	220432	182030	155431	340777	67580.3	919197	372581	633223	624833	399833	629861	396390	568224	586168	854906	692091	288256	733669	441534	432128	662149	515994	528912	195557
PSME1	Q06323	55709.2	55709.2	55709.2	94330.5	55709.2	98871.7	172607	72940.3	55709.2	55709.2	55709.2	93104.7	122370	60475.1	94654.9	122631	113443	25638	73664.5	25638	115312	25638	37307.4	129418	37307.4	37307.4	170853	37307.4	62278.8	106764
PSME2	Q9UL46	169076	105605	132847	258052	139371	151671	208300	185524	105605	121091	105605	459407	233045	207865	304345	176203	268727	144707	261939	194883	378790	214050	482443	341367	107893	51080.9	379229	146502	409076	277871
PSMF1	Q92530	215059	779739	365650	838227	254392	506896	485745	169467	204157	594729	167342	1990000	642765	1170000	1250000	903300	1320000	766542	1160000	947130	1460000	1290000	642274	1800000	663096	428171	1020000	510658	1600000	462493
PTBP1	P26599	1820000	519302	307658	242593	174962	160402	202226	149116	113189	159366	120196	2050000	1530000	479402	474921	269201	495995	129704	246871	513940	257708	279672	1410000	568389	294585	226021	235760	165508	133982	133982
PTGDS	P41222	460772	413768	413768	474494	504183	427371	461055	501467	430412	485483	413768	256941	177538	177538	177590	311354	257539	317268	332358	309244	492825	177538	430091	682996	435181	320296	358854	205651	432799	490526
PTPRF	P10586	744777	889981	546239	550492	737106	778807	956640	577587	851922	867990	526672	846576	790458	1030000	458406	704621	779770	413664	688795	567752	702187	1180000	787964	915348	876115	498666	376382	436319	474209	666977
PTPRS	Q13332	80715.8	68695.4	116941	47333.9	47333.9	55595.9	66147.6	53910.8	50889.3	105202	51224.3	74899.8	40656.8	61677.6	40656.8	65219.2	79363.7	82109.5	94093	65970.3	101580	82791.2	61866.5	34843.8	34843.8	62553.9	34843.8	48139.5	34843.8	34843.8
PYGB	P11216	936151	424712	1040000	822831	1020000	919251	1740000	1080000	1100000	612511	424712	1090000	539181	2460000	539181	847912	979312	588291	863104	644444	1530000	539181	445947	897120	1630000	735148	1180000	554116	462524	557871
PZP	P20742	863797	1850000	201243	185248	1400000	1800000	369803	1530000	719745	185248	912600	82569.6	296725	851108	533385	183561	538901	82569.6	775967	1590000	99751.4	602675	478518	608034	478518	789298	478518	478518	478518	670319
QSOX1	O00391	4330000	3610000	2980000	4390000	5240000	4700000	3350000	3020000	2900000	3490000	3570000	3870000	5030000	3740000	4690000	4490000	4590000	4630000	5410000	2590000	2550000	3110000	5520000	7690000	4060000	6120000	6540000	7960000	1610000	2570000
QSOX2	Q6ZRP7	292703	224703	224703	418168	224703	419553	242677	583312	241875	255420	392014	195409	302182	252601	338866	420477	380987	311244	304904	294834	378711	271208	566774	214156	359993	345431	426822	409136	188924	257092
RAB10	P61026	91942.3	41721.6	54698.8	41721.6	79842.3	101241	41721.6	91602.3	80375.9	134387	49901.8	113937	119883	56966.6	144810	61185	151151	60958.3	72087	40765	48159.5	97131.9	198482	70138.6	105932	96338.4	178321	73672	74627.4	64003.2
RAB18	Q9NP72	167709	94166.4	94166.4	154450	94166.4	143460	94166.4	130333	94166.4	173182	94166.4	297631	165846	165846	191429	283580	269141	200675	282930	165846	215668	205752	191733	174582	265209	236806	285062	218264	112674	112674
RAB1A	P62820;Q9H0U4;Q92928	201051	479862	430285	248017	443859	272819	295475	283409	288781	386282	210081	505541	701231	687955	415526	422439	566545	388243	506471	398858	583101	429534	342804	433197	611578	313043	469459	295603	591313	130610
RAB1B	Q9H0U4;Q92928	395688	86276.4	39525.3	39525.3	39525.3	39525.3	39525.3	39525.3	39525.3	39525.3	39525.3	86749.8	215810	72463.4	57171.6	36641.1	89264.6	23045.1	23045.1	23572.2	23045.1	23045.1	269751	66159	23197.8	23197.8	23197.8	23197.8	23197.8	23197.8
RAB5B	P61020	97843.7	97843.7	172923	224196	97843.7	193241	167903	248155	116993	97843.7	97843.7	612952	572082	167103	390853	167103	330371	257439	297003	215877	318796	167103	110029	338516	468419	295983	416623	258551	204630	110029
RAB6B	Q9NRW1	950303	667588	748547	667588	667588	728189	1100000	1110000	667588	742066	667588	1640000	1420000	1380000	2130000	1280000	1190000	803007	1070000	803007	803007	1030000	1550000	1480000	1610000	912187	1690000	1630000	1130000	789824
RAB8A	P61006	597916	1070000	809656	1020000	700177	857988	955793	898573	737335	603884	474918	1310000	1420000	1060000	901252	931740	1000000	969867	1140000	759091	1010000	966898	1310000	1140000	1020000	1160000	1510000	784959	872173	596277
RAB8B	Q92930	30341.9	79422.5	36431.4	87616.7	39765.9	60156.1	98387.5	72438.6	97136	30341.9	30341.9	87699.5	50925	185717	146192	106725	139981	50797.2	149568	32307.3	32307.3	63443.9	108329	65319.8	90986.9	56140.5	177726	56140.5	138706	88977.5
RABEP1	Q15276	1290000	2400000	2140000	5840000	2840000	1440000	1770000	2880000	7930000	13400000	6520000	1680000	1740000	1280000	2440000	1950000	1560000	1090000	2610000	5960000	8050000	6350000	1170000	2280000	2160000	1900000	6340000	1600000	8600000	11600000
RAC1	P63000	157500	367815	331712	442346	157500	201117	564527	362543	157500	295375	157500	914452	468836	446730	693959	568129	737177	525613	509290	394918	761818	344100	390896	807295	794320	424534	798059	434813	692931	377156
RAD54L2	Q9Y4B4	462711	237455	86850.6	87730.9	186484	40623.8	85606.2	56460.8	40623.8	40623.8	40623.8	82340.6	179075	157492	239023	155735	93283.5	68859.7	97570.2	68859.7	68859.7	68859.7	94759.4	114921	94759.4	203808	360133	102152	94759.4	129472
RALA	P11233	99897.2	91246.6	83334.3	71832.5	48558.5	86593.8	119862	163605	48865	51427.5	35114.5	131575	56109.5	86260.3	34319.1	102428	119923	61889.5	60671.6	34319.1	83064.6	34319.1	67431.3	107791	211420	93807.5	100179	67431.3	67431.3	67431.3
RAN	P62826	1590000	3580000	2920000	5230000	741316	2460000	4590000	1900000	1570000	4400000	1010000	20200000	10700000	14500000	12000000	13600000	15000000	8260000	12800000	11400000	17400000	13800000	5190000	22300000	9180000	7320000	17300000	11200000	10900000	3740000
RANGAP1	P46060	214899	214899	214899	214899	214899	214899	214899	214899	214899	214899	214899	496713	530973	370661	298179	298179	298179	968757	326179	601577	683735	595779	130500	682891	143428	103464	103464	209441	422866	149988
RAP1B	P61224;P62834;A6NIZ1	1280000	1800000	1230000	1220000	862207	956698	971770	1140000	741763	1060000	380773	1950000	1210000	1730000	1060000	1400000	1330000	924091	1150000	810940	1090000	923866	1100000	1420000	2210000	1430000	1080000	1230000	470133	603979
RARRES2	Q99969	3430000	2830000	3220000	4260000	2360000	3170000	5440000	2220000	3040000	2990000	3770000	1650000	2840000	2340000	1140000	2840000	2550000	3490000	2220000	3680000	4020000	2230000	2610000	2850000	4490000	3430000	2260000	2720000	3060000	3760000
RBP4	P02753	843502	929996	725280	1140000	1090000	696758	674192	556230	1000000	441072	528066	655458	1050000	634780	2200000	808034	1230000	688107	1090000	1480000	1390000	1140000	2120000	1820000	1330000	791119	487289	2180000	1630000	1510000
RCN1	Q15293	569593	354210	434856	533892	354210	479639	417512	508254	416783	507151	507707	455668	529630	417520	272276	432991	272276	560901	355507	770111	508293	725089	554511	380856	493408	138127	138127	346978	390793	345189
RELN	P78509	164921	142311	150561	133126	47601.8	152979	201035	82329.4	126618	124502	109241	165287	138806	101692	100164	246460	135674	135046	128610	178297	125376	91578.4	183780	145735	190078	140509	145093	664678	174416	144871
RHOA	P61586	457623	496990	377891	483134	399551	384827	447287	525489	188170	525134	243799	1140000	1090000	876265	499588	819897	1440000	562955	643292	496822	884844	538246	444507	623534	954699	564413	493867	506364	250920	205129
RIC8A	Q9NPQ8	95461.3	151940	95461.3	293439	95461.3	175383	164728	95461.3	95461.3	131227	95461.3	607019	595434	499416	555740	420277	530307	144644	588999	252177	243049	491246	234638	395585	234638	245763	699380	285688	347455	234638
RNF123	Q5XPI4	916787	681827	754938	738521	505769	1740000	833969	505769	1530000	1110000	1260000	874035	894041	621712	778280	646512	710073	969115	1420000	1150000	840732	836057	688551	357725	844485	1170000	755231	357725	357725	495888
RNH1	P13489	208649	319148	185532	163858	374317	196500	214394	161515	167366	256108	161515	303826	146769	187947	120210	178616	268367	230927	259894	174624	311798	291031	160510	73054.5	336892	3260000	70655.3	120477	201819	132657
RNPEP	Q9H4A4	430527	329992	575287	184052	551190	527928	244369	474212	311028	295828	344195	505685	656076	330906	255899	472069	424068	432046	453694	389124	401434	279845	218595	251624	218595	298367	298512	294293	226572	274980
RPL11	P62913	422473	766928	886553	408376	396457	136465	192667	438120	998171	1060000	136465	533580	1250000	423879	243407	463324	437296	769272	670022	311031	436695	363154	2110000	1860000	277485	352381	769742	507078	397294	601232
RPLP0	P05388	9020000	77678.7	77678.7	480773	77678.7	77678.7	77678.7	77678.7	376449	77678.7	77678.7	1400000	1140000	129589	129589	129589	173694	129589	129589	129589	129589	129589	4150000	148053	148053	430174	188695	201543	148053	253934
RPLP2	P05387	878133	878133	878133	878133	878133	878133	878133	878133	878133	878133	878133	195511	184792	413055	176653	196759	176653	282499	176653	176653	217353	219436	368721	47817.6	345869	47817.6	535967	558859	47817.6	138464
RPS10	P46783	10041.5	10041.5	10041.5	10041.5	10041.5	10041.5	28367.1	10041.5	10041.5	10041.5	10041.5	59740.4	54703	61203.2	19227.6	55308.9	105129	22305.6	19227.6	21895.4	87680.2	19227.6	23352.9	11784.5	11784.5	32920.1	28664.1	34728.3	18635.9	11784.5
RPS15	P62841	996122	1610000	86204.4	86204.4	86204.4	86204.4	594785	86204.4	86204.4	86204.4	226188	163329	100960	100960	100960	770400	100960	1270000	100960	184740	100960	1330000	906922	308151	154933	154933	154933	431788	2160000	1440000
RPS15A	P62244	88714.1	88714.1	88714.1	88714.1	88714.1	88714.1	88714.1	88714.1	88714.1	88714.1	88714.1	89703.2	115293	93373.9	19028.7	65926.3	199163	19028.7	19028.7	19028.7	155823	39848.5	55331.2	55331.2	55331.2	55331.2	148133	55331.2	55331.2	55331.2
RPS23	P62266	1060000	704304	821241	299802	286547	233489	186910	337778	188587	182954	192063	2290000	2350000	666534	684408	334825	535068	292883	309499	162277	217513	152201	2220000	676746	387952	495685	483622	473926	387952	387952
RPS24	P62847	41500000	123000000	99600000	97000000	72700000	45100000	70300000	97900000	126000000	87300000	60100000	55200000	28500000	28500000	28500000	55400000	73500000	90900000	79800000	112000000	135000000	126000000	92900000	110000000	66800000	65800000	75700000	84600000	101000000	137000000
RPS27A;UBA52;UBB;UBC	P0CG47;P0CG48;P62979;P62987	421843	488017	350076	308152	1060000	457190	408323	290443	362938	666511	206185	914736	789030	588961	622575	807807	661077	519342	376382	598934	891932	1030000	716940	479644	748047	483855	827019	558259	679097	408941
RPS7	P62081	180831	52331.7	133306	58785.1	52331.7	90728.5	104475	145630	72057.5	52331.7	52331.7	215715	133662	63406.8	431360	78117	134448	49335.5	49335.5	49335.5	143319	49335.5	134791	126069	83669.2	151710	156072	472359	83669.2	83669.2
S100A4	P26447	282895	383216	387095	166674	268743	431732	166674	166674	271866	313710	166674	583422	479491	1580000	492512	448705	705531	359648	530212	211377	400081	355324	336532	454336	303102	923463	541780	550148	303102	303102
S100A6	P06703	346417	736782	428594	1050000	141307	889726	752990	423761	348144	482270	297532	2570000	709012	1770000	325666	1540000	1290000	1130000	838125	683630	1290000	1210000	771992	1340000	841018	624426	880653	578196	433210	243586
S100A8	P05109	339554	802134	1250000	1780000	739350	611691	867961	778675	518350	605006	495179	16200000	9860000	1780000	1840000	2280000	22300000	1470000	1440000	2580000	9000000	2040000	754547	926271	771683	1300000	714906	753406	2790000	484448
S100A9	P06702	299797	120894	172163	322826	356991	115746	113952	134356	237449	274871	224420	1460000	1210000	270896	621644	612280	2080000	246496	168092	424784	1540000	466462	145853	267375	123873	533025	149223	262649	888335	153120
S100P	P25815	92990.2	161432	94769.1	92990.2	183251	228833	160898	159447	299762	92990.2	92990.2	251348	189134	138952	138952	138952	252608	186895	138952	138952	151222	138952	218656	60302.1	228880	60302.1	60302.1	105123	60302.1	60302.1
SAA1	P0DJI8;P0DJI9	3740000	8520000	369000000	16300000	35600000	36100000	27600000	7640000	11800000	2730000	159000000	2390000	10500000	7490000	14700000	5300000	1810000	4670000	5640000	2520000	4750000	5490000	3910000	9080000	2930000	16600000	7210000	4610000	5270000	6580000
SAA2	P0DJI9	324781	1200000	81800000	1670000	2150000	3880000	5690000	1020000	2260000	280808	40600000	236871	878862	673266	8070000	357503	431534	554716	1010000	306049	558410	1120000	306188	2160000	733866	820159	550536	828533	509324	452946
SAA4	P35542	35100000	37500000	80700000	64300000	65700000	85800000	48700000	65100000	32300000	33400000	58100000	34800000	37500000	34300000	87600000	32700000	32800000	55400000	35300000	39200000	41400000	56000000	34100000	37100000	29300000	60500000	61300000	40100000	48600000	76900000
SAE1	Q9UBE0	17600000	15800000	8760000	20800000	8140000	9350000	22900000	9230000	16800000	19700000	9700000	14300000	19900000	15300000	4660000	16400000	18100000	15800000	12500000	16700000	18100000	16500000	17100000	14200000	32500000	15600000	10800000	16300000	24300000	22100000
SAR1A	Q9NR31	279712	178069	270065	217787	151955	361691	507531	402843	143603	155330	139000	545033	366078	233183	270243	421081	466021	225465	239253	102621	178389	110768	350241	370460	586452	275041	591052	396246	135263	200167
SBSN	Q6UWP8	510038	516169	808190	703746	2190000	566172	849664	1100000	448963	919006	427694	836025	461717	794278	577220	958470	703000	959486	525595	855325	732163	997265	302409	447492	851079	644929	273063	665688	901825	840621
SDCCAG8	Q86SQ7	604136	1270000	932671	1270000	1220000	590269	579466	536242	942111	448639	326860	610488	1170000	1410000	389078	660433	575374	989019	557936	389078	630055	389078	735979	418701	641641	385660	727088	447144	498880	167296
SDF4	Q9BRK5	871339	428662	456741	479715	304266	431933	604814	578893	846792	783260	871179	311348	278371	332125	188033	935806	188033	802982	280712	188033	245416	456259	657170	498276	746284	151293	151293	194098	740009	351091
SDHA	P31040	1770000	980042	482808	333186	431345	630188	333186	444120	333186	333186	1430000	1680000	2090000	735249	852424	712719	811640	1060000	164969	164969	164969	374158	2390000	946238	809398	632774	632774	2200000	632774	632774
SEC14L4	Q9UDX3	104648	238892	188852	261249	104648	164040	220198	149904	104648	204486	104648	716957	637014	504024	528942	436040	513328	315100	602250	437268	734012	488926	755487	586882	362796	143490	788366	376206	712208	348578
SELENOP	P49908	22700000	24700000	22900000	19900000	18800000	19300000	19200000	20900000	18400000	21400000	9680000	29400000	22700000	22100000	14000000	18800000	29200000	25700000	24100000	28200000	37600000	34600000	33500000	19700000	19300000	23000000	23300000	17800000	21500000	14200000
SELL	P14151	1520000	1220000	1980000	1490000	1540000	1390000	1300000	1340000	1940000	1130000	1870000	1400000	936352	1660000	1710000	1700000	1100000	1430000	1500000	2110000	1340000	2010000	1070000	618419	1570000	1480000	935424	683667	1490000	2400000
SEMA3B	Q13214	185676	152359	201403	186029	268943	190441	152974	281153	129939	235724	194231	215477	250220	226599	383235	311154	252254	267928	278710	322981	229943	212480	206760	213463	264170	579519	157040	387742	157040	463209
SERPINA1	P01009	41400000	39400000	52900000	46000000	67200000	66400000	62200000	53100000	27600000	32400000	109000000	53800000	39400000	43100000	66200000	55600000	42600000	51800000	49000000	34800000	39200000	42000000	39900000	48200000	44300000	49600000	29600000	75900000	57800000	62500000
SERPINA10	Q9UK55	61400000	90800000	69700000	81500000	69200000	80400000	78100000	71600000	48800000	74000000	55800000	43600000	73000000	56600000	53500000	73300000	67100000	48200000	55100000	57200000	64000000	69500000	65100000	53700000	69400000	55400000	74700000	58100000	69800000	81700000
SERPINA11	Q86U17	1970000	1330000	1030000	1160000	2120000	1680000	1750000	2240000	2290000	1500000	1010000	1470000	963249	1370000	1350000	1960000	1350000	1260000	1750000	1350000	1380000	1340000	805104	928255	1370000	1830000	936277	1620000	890110	1140000
SERPINA3	P01011	23700000	30600000	28400000	30500000	24200000	38800000	82900000	23900000	22200000	21000000	31500000	14300000	11200000	15800000	10600000	16100000	15300000	20300000	18900000	18500000	12100000	18700000	19100000	16300000	22000000	17200000	10800000	12700000	20400000	18100000
SERPINA4	P29622	61000000	69200000	43700000	87000000	80800000	83800000	43100000	63100000	71000000	94700000	35200000	41500000	114000000	70500000	82300000	97400000	73100000	95400000	99800000	61500000	84300000	53000000	98000000	62700000	75300000	84500000	110000000	66200000	69000000	77500000
SERPINA5	P05154	1010000	1140000	624966	1130000	1080000	937633	777136	810632	1050000	1360000	790371	1240000	1130000	1320000	826807	1560000	1410000	1460000	1260000	1240000	1610000	1390000	1630000	984837	1080000	1260000	1320000	1030000	1140000	1070000
SERPINA6	P08185	1410000	1510000	1530000	1540000	1830000	1580000	1710000	1620000	1200000	1570000	2190000	1520000	1550000	1500000	1610000	1740000	1310000	3280000	2010000	2100000	1860000	1610000	1920000	1480000	1350000	2790000	2200000	1450000	1400000	997290
SERPINA7	P05543	3630000	4010000	4180000	2080000	2410000	4350000	3380000	3220000	3490000	4630000	3170000	2820000	2480000	3580000	2020000	2650000	2040000	2930000	2450000	4420000	2730000	4300000	2460000	3670000	1980000	3500000	3120000	5380000	3440000	3440000
SERPINC1	P01008	14900000	18200000	19100000	48900000	14000000	34100000	23700000	17400000	21600000	16800000	160000000	27000000	27400000	26800000	56600000	25000000	18500000	19600000	16900000	30200000	25800000	26600000	27400000	25500000	26600000	46100000	14000000	49600000	20100000	16900000
SERPIND1	P05546	7050000	6590000	4040000	12100000	4370000	16500000	5080000	3750000	5220000	4130000	3520000	6740000	8600000	10800000	11100000	7600000	8770000	10000000	5610000	8440000	10200000	6540000	10400000	14800000	6610000	16600000	12500000	21200000	5390000	8300000
SERPINE1	P05121	341888	42843.2	168047	268561	42843.2	183987	415397	42843.2	125228	206202	187973	43335.6	43335.6	43335.6	43335.6	101891	43335.6	43335.6	104867	43335.6	85535.4	43335.6	313951	166211	91694.6	91694.6	91694.6	91694.6	95852.6	99371
SERP101	Q8WTW5	2790000	2170000	3380000	1950000	1940000	2270000	5360000	2310000	2700000	3070000	1900000	1880000	2410000	2300000	937482	1730000	2600000	1730000	2030000	1640000	2150000	2290000	3320000	3730000	3520000	2240000	2500000	1730000	2500000	2300000
SERP102	Q76M29	8160000	9410000	7500000	9080000	9400000	11200000	8040000	9270000	6210000	7850000	5510000	6840000	9450000	8480000	9970000	9140000	6870000	8350000	9060000	7000000	6370000	6630000	9160000	8500000	7400000	10100000	7250000	8010000	7920000	10300000
SERPING1	P05155	63500000	77400000	74400000	52900000	46200000	57400000	66500000	70500000	38100000	61200000	60700000	64900000	64800000	48500000	18200000	57400000	70200000	56900000	83700000	53300000	53200000	45300000	28600000	30800000	42900000	39300000	25500000	34600000	34600000	50400000
SHBG	P04278	13200000	24200000	5410000	16600000	28700000	14100000	11000000	13300000	11000000	6880000	11100000	9270000	3280000	12700000	18000000	16700000	22200000	48700000	25100000	12000000	7050000	10700000	9450000	13900000	7720000	35100000	9020000	29500000	5380000	13800000
SIL1	Q9H173	168296	128760	197485	105816	122926	38197	199388	150070	246523	145574	292239	111619	70036.8	59275.8	59275.8	91435.6	59275.8	137311	113646	179732	286798	176055	124992	100553	137813	110584	88601.8	88601.8	112118	188912
SKP1	P63208	179515	179515	179515	179515	179515	334208	179515	179515	179515	179515	179515	1130000	575876	491934	110036	752415	305242	110036	647914	445416	565643	632837	491336	384006	149306	149306	149306	149306	691219	157983
SLC25A6	P12236	7100000	1170000	763021	320201	320201	320201	393927	320201	320201	320201	320201	6830000	3000000	1120000	976239	670834	1340000	862347	670834	670834	3210000	670834	8220000	1540000	477189	693357	150563	451016	150563	150563
SLC2A1	P11166	89297.3	2210000	83248.5	133059	83248.5	83248.5	83248.5	83248.5	83248.5	209409	83248.5	908737	115125	144995	201373	142788	261049	115125	148599	219988	249787	165045	140290	614091	389950	59967	15844.6	169556	15844.6	15844.6
SLC39A10	Q9ULF5	240138	109280	199835	104653	24973.9	122730	255343	193387	185772	115527	136940	194123	150561	75081.9	75081.9	95013.2	221555	112556	80770.5	164827	127071	75081.9	112858	174096	150509	99399	113044	127477	71520.6	56821.1
SLC4A1	P02730	163296	103168	197731	114121	101347	101347	897855	119550	195915	553835	101347	2110000	114378	290420	341736	398624	493749	180533	386442	447252	585403	467039	290359	1740000	1110000	207351	174322	484287	154132	88087.9
SLIT1	O75093	192709	228623	192709	192709	2300000	5790000	23400000	197123	6940000	192709	10100000	5220000	101957	55573.1	206592	55573.1	55573.1	6760000	55573.1	3370000	148577	4980000	76077.4	117924	19300000	80106.6	4020000	76077.4	9330000	4420000
SMOC1	Q9H4F8	26913.3	26913.3	125412	104439	484755	26913.3	53214.7	292344	26913.3	92667	124161	21784.1	21784.1	21784.1	21784.1	21784.1	21784.1	21784.1	21784.1	21784.1	21784.1	21784.1	12930.1	65334.9	33297.2	12930.1	12930.1	17273.8	12930.1	12930.1
SMPD1	P17405	734228	1230000	907077	1250000	1490000	1840000	2190000	864784	1070000	1390000	1530000	930052	1050000	801365	332523	764165	743167	1060000	1040000	1070000	1010000	668503	1390000	1520000	1330000	1800000	2520000	1440000	698489	1800000
SNCA	P37840	1540000	4950000	2140000	3580000	1770000	1700000	2330000	1790000	1330000	3250000	773890	12200000	10400000	16000000	8140000	5550000	11000000	4790000	9540000	9380000	13700000	15600000	3130000	10400000	5140000	2980000	6090000	3910000	16600000	2730000
SNED1	Q8TER0	1900000	1760000	2320000	1640000	1350000	1650000	1870000	2080000	1670000	1180000	989026	2090000	2140000	2130000	1140000	1920000	2450000	2150000	1800000	1820000	1470000	1310000	1740000	1410000	2250000	1990000	1650000	2120000	1100000	1120000
SORD	Q00796	243711	94040	94040	264872	94040	100553	336441	221772	133704	381717	94040	280409	352382	134578	134578	256007	337414	220896	285431	134578	257491	295628	276043	327333	316545	276043	425063	276043	276043	276043
SPARC	P09486	43400000	4070000	9900000	23800000	15200000	18100000	31900000	15800000	2840000	6700000	23800000	11600000	4880000	4630000	717075	7300000	4180000	5560000	3400000	2370000	7960000	3190000	8330000	5560000	2440000	1810000	2170000	2100000	13700000	8340000
SPARCL1	Q14515	3630000	4380000	3430000	3130000	3070000	4300000	3560000	5380000	5370000	5530000	4760000	4750000	3120000	3820000	1100000	4220000	3370000	5070000	4210000	2870000	4010000	3840000	3680000	2780000	3350000	3340000	2350000	2550000	4780000	2480000
SPON1	Q9HCB6	479756	317822	399104	195003	199441	430950	507494	429504	448854	286529	370320	366730	204887	296160	197825	298869	197825	700204	322294	222950	285159	226204	364345	344557	362069	189640	161174	265158	222368	127566
SPON2	Q9BUD6	224332	261830	221331	264355	361758	223613	304745	231774	286143	188512	324386	144202	251145	201169	261932	294261	207624	162831	225840	174664	219612	68498.3	146015	336804	206510	213509	199557	321395	99264.6	241093
SPP2	Q13103	18500000	23800000	12800000	14000000	11000000	15700000	14500000	17200000	28900000	11800000	14800000	25600000	14900000	19300000	29800000	22100000	21500000	15600000	24500000	29000000	21500000	24700000	10400000	6950000	11000000	16000000	5530000	13900000	11100000	17500000
SPTA1	P02549	982365	1460000	556455	899025	1250000	1310000	468794	598382	231658	426172	361766	1190000	1530000	1040000	1850000	873551	772785	1150000	844934	380723	380723	624230	1660000	1590000	799110	1930000	2160000	1770000	799110	1480000
SPTB	P11277	641370	1310000	620957	981504	1010000	574458	574458	574458	789879	721508	574458	1360000	2090000	2040000	1420000	970172	1700000	1390000	678084	1380000	1830000	1010000	1090000	1840000	2330000	1830000	1310000	928138	318836	1210000
SPTLC2;SPTLC3	O15270;Q9NUV7	4090000	3570000	5440000	361936	2190000	83226.5	211693	769091	1460000	8490000	4030000	3160000	2450000	728130	1320000	1250000	1280000	515295	2940000	4400000	5600000	4880000	3680000	2020000	95730.9	665095	1410000	110085	111723	95730.9
SRI	P30626	124215	124215	124215	124215	124215	124215	124215	124215	124215	124215	124215	273429	178902	38657.6	38657.6	148989	140813	38657.6	234551	38657.6	61593.6	253493	145379	242084	145379	145379	145379	192928	145379	145379
SRPX	P78539	169903	405786	190578	211861	169903	240690	177186	285458	172000	196494	324777	101587	101587	258177	238034	219847	170234	219001	227393	211834	122592	101587	183708	406830	183708	265943	183708	348494	183708	183708
ST13	P50502;Q8IZP2;Q8NFI4	1120000	1650000	1580000	2500000	703171	1360000	2530000	1320000	833389	1800000	700777	4550000	3400000	3510000	1080000	2270000	2820000	2010000	2380000	2270000	4530000	3560000	2080000	4450000	1950000	1310000	2060000	1680000	4060000	854483
ST3GAL1	Q11201;Q16842	326648	251311	309741	343534	556169	379704	251311	278051	269198	289485	331134	277471	277471	403588	432081	381747	429392	444768	513880	430572	577768	277471	467148	309502	277607	398280	337896	339563	277607	475863
ST3GAL6	Q9Y274	1210000	926520	1160000	1680000	1050000	1050000	1370000	1220000	607776	821015	711843	1110000	1190000	761810	1120000	927500	1020000	561697	942609	815800	486617	644829	1160000	907358	710639	1080000	1040000	920452	399939	1290000
ST6GAL1	P15907	3560000	3210000	3980000	4060000	3670000	3750000	3770000	3390000	2780000	2220000	4400000	2830000	2800000	3320000	1720000	2660000	2970000	2410000	2770000	2300000	2430000	2120000	3350000	1990000	2460000	2510000	1600000	2930000	2470000	4190000
ST6GALNAC1	Q9NSC7	359177	322117	281514	549589	265457	775471	400309	522036	453371	329260	750936	473936	552364	381519	346605	1320000	455738	473003	361470	312037	442978	401955	758489	431499	819390	513927	492230	330187	190198	368965
STAB1	Q9NY15	191333	50064.8	50064.8	225513	50064.8	151751	66508.6	144642	50064.8	105764	110736	121803	159679	209582	121803	144071	121803	121803	157858	121803	121803	121803	43695.8	178312	163611	43695.8	43695.8	43695.8	43695.8	43695.8
STAB2	Q8WWQ8	342118	199506	281138	187044	113568	218906	264616	230083	289517	113568	165861	252963	133987	121277	112979	128225	158213	181697	112979	181269	112979	120326	182143	125315	285996	177511	127261	128668	216610	97214.2
STC2	O76061	136077	125207	150464	134457	102165	161307	172979	127355	99659.6	131454	96957.8	178779	88846	147545	88846	175701	115112	123057	105885	142662	105141	187585	95232.1	87785.8	169645	108843	83358.9	83358.9	121723	114643
STIP1	P31948	407700	623347	440875	988791	195036	554160	811575	394537	318275	880539	270036	1900000	1640000	1260000	405824	1190000	1610000	1050000	1210000	1160000	2390000	1480000	808068	2130000	862551	535295	1070000	602821	1230000	260913
STK26	Q9P289	1550000	3090000	2750000	1550000	1650000	994618	1360000	1970000	994618	1130000	994618	1870000	2910000	2320000	1840000	1470000	1560000	1320000	912783	1640000	1530000	1120000	1390000	1390000	1170000	1650000	838073	585745	585745	1250000
SVEP1	Q4LDE5	505479	406352	340174	392259	360743	422475	669610	325946	422546	369470	738395	387338	386614	480199	287380	557880	434515	569085	611654	284791	384369	265979	450303	862511	551118	452915	353671	650088	386428	513576
TALDO1	P37837	137681	137681	293741	137681	316268	213753	137681	780470	137681	137681	137681	236204	382300	151707	195184	406006	420813	151707	151707	176040	248340	151707	214833	214833	214833	214833	214833	214833	214833	214833
TAX1BP1	Q86VP1	1430000	2130000	861166	1710000	646574	1680000	1610000	1630000	301256	301256	301256	742250	2890000	2480000	5270000	2130000	2280000	2210000	811834	388169	428388	388169	2270000	2540000	1140000	3360000	2530000	3170000	716878	3300000
TCN2	P20062	417387	1110000	330142	759429	486353	1100000	297606	346155	313658	129078	280959	263382	829638	179653	749779	888401	847075	375584	336077	667708	159118	157730	141842	398381	462408	359275	365443	758559	365281	141842
TCP1	P17987	691103	805064	344524	755978	171276	299174	563770	262285	250742	171276	171276	1530000	1210000	972926	2190000	748608	860046	620624	748188	658403	1160000	1230000	651977	2530000	678568	546494	903290	833628	907251	326640
TF	P02787	45300000	37400000	24500000	55000000	36400000	38400000	25900000	28900000	47100000	25500000	31800000	25100000	28300000	22200000	39500000	58000000	23000000	41200000	30300000	57500000	30500000	39900000	50800000	96000000	32400000	25100000	29700000	38900000	25300000	30100000
TFPI	P10646	554688	710174	434256	431168	648916	529947	779520	478836	726741	754223	699524	437243	416509	588161	507667	554383	466157	387958	731224	515427	522809	585181	590739	577239	666654	431601	566362	577155	727155	1160000
TFR2	Q9UP52	779434	403758	556789	584043	287510	495928	478756	287510	476763	374900	533517	689137	675518	364383	740711	463532	409790	374546	356607	514271	331455	443718	688926	464179	711252	1430000	1180000	911006	364042	638876
TFRC	P02786	6530000	832701	5790000	545255	1730000	1310000	1260000	2100000	1140000	849461	1700000	2430000	2060000	661160	1540000	17600000	2360000	1550000	1890000	2380000	2470000	771990	437982	1420000	919123	957994	1010000	877498	363197	690215
TGFBI	Q15582	5250000	5060000	4120000	4870000	4610000	3190000	4360000	4620000	5090000	8460000	3890000	5000000	2900000	6520000	2210000	3510000	3010000	5080000	7410000	5280000	7790000	5380000	4740000	4480000	5650000	3630000	2530000	3450000	6400000	3760000
TGFBR3	Q03167	8955.67	42303.6	8955.67	84087.4	8955.67	155035	8955.67	8955.67	20184	8955.67	60606.7	40432.4	51889.9	78730.2	107058	40432.4	63410.2	40432.4	69217.6	64528.9	40432.4	56458.8	8771.25	55379.4	29875.7	156530	8771.25	298551	8771.25	42052.8
TGM3	Q08188	65895.3	65895.3	97197.4	65895.3	649709	65895.3	71584.9	81091.1	65895.3	65895.3	170374	188041	124596	90305.6	168522	198319	151832	51736.9	159250	250753	206644	176495	29176.1	77414	216736	99345.4	29176.1	29176.1	29176.1	29176.1
THBS1	P07996	57100000	3110000	6840000	26100000	15000000	24600000	32200000	14300000	1050000	3220000	11600000	12200000	8220000	4540000	2270000	7040000	3880000	4320000	2630000	1400000	5780000	966942	4490000	3580000	735766	2100000	2540000	3090000	4900000	9030000
THBS4	P35443	1350000	1230000	1390000	1340000	1670000	1170000	1180000	1010000	1410000	1850000	802719	1680000	1920000	2000000	1420000	1710000	2260000	2540000	2000000	1750000	2520000	1410000	2240000	2090000	2240000	2320000	2380000	1970000	2210000	2130000
TIMP2	P16035	645415	307901	475070	299972	419212	445892	537085	562554	449431	627012	469335	458948	310530	568790	143454	705883	494972	663332	432715	301570	650460	401487	525848	624866	561832	320068	320068	530070	449800	501183
TIMP3	P35625	1910000	457858	434301	1270000	399622	719862	1650000	1520000	294072	378470	1880000	362490	497546	401239	167987	342774	194969	319004	281892	167987	424393	167987	410906	350018	269008	362134	190653	215614	433443	491535
TKT	P29401	713635	611943	415591	710847	965797	504071	584063	813963	567710	597752	454000	1180000	914244	679062	445572	484103	1140000	638957	716909	563299	1060000	777514	684701	617981	747511	297958	362583	327074	617058	227231
TLN1	Q9Y490	1340000	770009	983880	1020000	612019	782800	2900000	512088	430643	734231	451485	1390000	850819	561075	858500	1100000	994712	642946	578538	871964	1010000	1050000	1020000	538187	2890000	425324	409884	416325	356237	1020000
TNN	Q9UQP3	132875	103475	89571.6	104480	46332.3	84141.1	60420.6	71899.8	73987.8	86690.6	70441.9	81708	134494	119741	41764.7	110707	50323.8	103908	73041.5	41764.7	65069.4	68760.3	186594	71082.8	114596	69228.3	20942.5	91638	84244.5	20942.5
TNXB	P22105	179704	114400	108898	109910	92051.4	69403.1	114691	155151	126623	146413	108817	144942	95861.1	117988	81696.4	101623	100722	152586	124879	116976	149008	817671	141120	106004	552727	139569	38294.6	112695	117118	38294.6
TOR1A	O14656	120406	192986	57117.4	57117.4	113850	122695	144677	205594	235908	144974	135843	59684.5	70044.3	144242	59684.5	171894	59684.5	108316	207073	101956	163951	108480	183308	79066	94489.3	220191	199086	219926	73963.2	84294.7
TRAP1	Q12931	8100000	1760000	899054	253371	541242	253371	580800	500446	253371	253371	483334	10500000	8050000	1290000	1540000	443890	916995	483932	414564	414564	789696	435449	8290000	997542	428104	648235	641905	428104	549356	428104
TRHDE	Q9UKU6	119077	35903.6	259505	270935	198040	136116	84608.4	205893	35903.6	322319	204803	262970	735296	137729	453269	80244.1	80244.1	80244.1	80244.1	152769	264033	86197.8	431859	234863	386139	75149.2	682851	75149.2	146006	75149.2
TSKU	Q8WUA8	219175	219175	226291	363262	609457	311081	393689	273410	386731	264496	319651	137896	198882	353227	476211	515925	137896	622233	313638	137896	547139	387407	602790	337989	530774	1690000	523391	1580000	570412	925254
TTR	P02766	5640000	11900000	6840000	10100000	12800000	9090000	8860000	6310000	7560000	14800000	6960000	7540000	9870000	9210000	4870000	9400000	7880000	8390000	9630000	10000000	11100000	12600000	10100000	9790000	8780000	6380000	8200000	10800000	15500000	19800000
TUBA1C	Q9BQE3	2830000	902612	408145	709011	1120000	434423	977261	525814	950904	614287	286007	1500000	1290000	1360000	1250000	804944	1030000	724986	665684	515293	1010000	1210000	1600000	1030000	1560000	788937	1140000	835793	740776	493404
TUBA4A	P0DPH7;P0DPH8;P68363;P68366;Q6PEY2;Q71U36;Q9NY65	3430000	2070000	1620000	2220000	2090000	1510000	4140000	927902	1190000	1270000	590021	6440000	3840000	2600000	2260000	2350000	3000000	1960000	1600000	2210000	3170000	2680000	2710000	2350000	6950000	1560000	2050000	1550000	2040000	1310000
TUBB	P07437;Q13509;Q13885;Q9BVA1	1020000	509758	368206	589871	431940	434119	1060000	142997	282060	171371	97818.1	1140000	776020	458161	325961	543123	821710	368563	421551	522005	766168	799418	780186	467077	1300000	293973	289967	351086	476412	323195
TUBB1	Q9H4B7	631163	533160	323699	580483	262022	363939	1210000	232151	186977	318484	38099.8	923968	555312	455409	478342	697417	575366	368644	176564	486261	540824	421191	428820	274082	2350000	296963	950400	240270	180260	136378
TUBB4B	P04350;P68371;Q13509	1400000	974463	714841	1530000	1230000	948606	2590000	518216	790852	870590	394500	2560000	1850000	1440000	1100000	1200000	1980000	1200000	994866	1670000	2570000	1980000	1120000	1310000	3480000	909598	1290000	1170000	2120000	1300000
TUBB6	P04350;Q9BUF5	1100000	234069	107894	20419.3	20419.3	211920	164245	20419.3	20419.3	20419.3	20419.3	1210000	984777	429780	406521	242657	437133	207353	158930	90443.1	243917	266647	970863	358037	565431	358037	358037	358037	358037	358037
TUFM	P49411	265131	152603	258642	357310	357338	165035	152603	206109	364228	304601	255985	226020	150383	158877	329148	401483	279539	417043	368613	227081	317876	326985	375470	114552	244002	390135	320124	350344	88340	88340
TXN	P10599	142574	142574	184448	157104	3020000	174694	246005	142574	142574	173993	142574	508541	311308	306675	249129	378619	512369	280905	284553	218328	368756	218328	150810	246668	1280000	150810	156294	278303	150810	150810
TYMP	P19971	403041	292614	436983	640022	703471	554928	595943	739279	522733	297153	236855	534526	545050	666590	219709	474413	539226	292460	352866	207038	207038	284929	508273	526107	522136	558713	324264	708474	177237	264599
U2SURP	O15042	829826	376340	1030000	597227	150835	962755	834101	150835	150835	150835	150835	339527	207769	207769	207769	726671	731379	804773	888006	207769	207769	207769	1230000	870819	716569	24801.3	1010000	24801.3	24801.3	534509
UBA5	Q9GZZ9	55190.6	95386.4	123581	283203	55190.6	55190.6	194827	315144	55190.6	229950	55190.6	500829	484084	517863	306717	292299	290521	530206	317712	216832	524178	349027	248623	537468	97732.1	140879	422098	242760	600787	200723
UBAC1	Q9BSL1	191200	138615	84046.6	176642	84046.6	85710.6	157326	84046.6	112434	131894	84046.6	288739	166501	183693	35484.8	136115	193703	167870	151577	143818	308188	200540	97533.3	297643	76567.3	76567.3	96048.6	152020	227958	76567.3
UBE2N	P61088	43352.8	43352.8	43352.8	43352.8	43352.8	43352.8	63699.9	43352.8	99892	56007.2	43352.8	187468	138098	130774	61662.3	117584	141829	60847.4	37963.9	53192.3	165276	129620	41257.6	81230.2	55396.8	41155.4	72246.3	41155.4	82301.4	41155.4
UCHL5	Q9Y5K5	23643.3	23643.3	23643.3	23643.3	23643.3	23643.3	23643.3	23643.3	23643.3	23643.3	23643.3	58712.2	10640	10640	10640	33511.9	25980.3	10640	39648.4	41296.8	47709.2	50551.8	80617.2	80617.2	80617.2	80617.2	80617.2	80617.2	80617.2	80617.2
UGP2	Q16851	328010	61176.1	95374.8	162450	146144	232947	257551	332671	265136	384851	247396	38860.5	333758	130584	38860.5	83552.3	60942.2	66543.7	196148	182519	213634	38860.5	83971.6	316670	488586	83971.6	809195	83971.6	118432	83971.6
UGT2B7	P16662	81895.8	81877.2	74496	111720	64413.3	63374.7	31257.7	61313.8	94904.3	60975.6	31257.7	109997	143307	99532.2	200091	60885.8	57903.8	130915	83881.6	90151.3	106027	80567.4	156740	44027.2	162459	78140.3	209826	66759.2	53127.1	44027.2
UMOD	P07911	540008	657867	403264	514595	399636	646865	394682	498862	538557	461385	280763	566189	382787	733028	469190	576575	610403	536189	651142	504298	320973	572555	366418	230518	395298	909837	328825	673594	294368	289425
USO1	O60763	642860	793812	158380	584717	1050000	459512	318577	388324	158380	158380	158380	749148	1500000	1010000	1610000	632555	707937	687060	770868	632555	632555	632555	1590000	1170000	365745	1870000	1720000	1250000	365745	365745
USP14	P54578	815578	1110000	1370000	1230000	307096	782239	1540000	495582	307096	1460000	307096	3290000	2960000	3640000	1020000	1630000	1610000	2020000	1610000	1660000	2920000	2400000	989713	3830000	749350	710364	2480000	2170000	1730000	561795
USP17L15	C9J2P7	503050	57022	330172	478365	57022	57022	57022	63304.4	155837	57022	345475	46359.6	590787	417951	53058.8	62556.5	46359.6	73711.7	720478	252325	46359.6	46359.6	707974	36922.4	34772.1	34772.1	258318	132934	125043	34772.1
USP5	P45974	260992	112676	227492	473036	112676	142272	258247	188203	152866	379747	112676	598045	435205	395829	324169	382000	353393	331225	364007	430028	893956	696828	258298	592003	324119	258298	459214	278031	672298	258298
UTP20	O75691	8370000	407905	407905	1220000	777154	407905	423343	407905	1120000	1070000	407905	555264	349100	349100	349100	535589	355529	620154	349100	783706	1390000	1030000	1820000	310526	482149	310526	310526	310526	4550000	2140000
VAT1	Q99536	2260000	2370000	2660000	2610000	1990000	1590000	2050000	3440000	2530000	2520000	1780000	1830000	2420000	2380000	2190000	1690000	2820000	2020000	2110000	1400000	2000000	1350000	1850000	2020000	2730000	2100000	2050000	2250000	1950000	2590000
VCAM1	P19320	1940000	1220000	1260000	1140000	1440000	1280000	1580000	1020000	1390000	1310000	1650000	1260000	911759	1300000	1130000	1330000	1300000	1830000	1680000	1120000	1050000	1370000	1160000	1250000	1450000	1360000	1070000	1190000	1040000	804440
VCAN	P13611	572240	471795	568675	418158	211346	618906	879563	591387	759228	424904	903610	407223	469450	464165	155413	491947	546001	479198	452609	424223	360964	488105	542457	530173	693986	514070	435739	404384	472110	379213
VCL	P18206	2260000	1780000	1820000	1840000	2390000	1940000	1630000	2120000	2570000	1920000	1660000	1490000	1380000	1200000	1400000	1460000	1770000	1650000	2130000	1190000	1300000	1280000	1540000	1320000	1980000	1680000	1610000	2210000	739043	970527
VIM	P08670	3180000	715819	783023	638493	401652	475589	605492	557088	315883	242816	330490	1770000	1440000	811389	960006	479999	954913	296814	382321	386756	471661	389505	1800000	699097	678636	841956	602190	622148	228820	286560
VPS4A	O75351;Q9UN37	103331	103331	167102	240468	103331	103331	208542	103331	103331	112812	103331	539751	535942	256390	273278	237399	567355	197338	231785	308117	414572	330299	166963	277325	270680	76760.9	252225	242236	170726	76760.9
VTA1	Q9NP79	156917	156917	156917	156917	156917	156917	156917	156917	156917	197578	156917	349486	252694	329514	208532	174950	365579	194104	174950	274332	452593	174950	253355	452668	253355	253355	253355	253355	258554	253355
VTN	P04004	84800000	105000000	101000000	78000000	84400000	84900000	184000000	81400000	90400000	88100000	77200000	76700000	139000000	103000000	122000000	112000000	79700000	105000000	91200000	153000000	122000000	138000000	103000000	88100000	91400000	102000000	69500000	123000000	141000000	96300000
VWF	P04275	1200000	985445	715629	1640000	837965	1460000	1030000	1500000	1660000	815703	1010000	1320000	1090000	753982	551614	1070000	1020000	1250000	1030000	741959	734393	629125	1040000	1280000	933243	952618	683903	1570000	833294	980813
WARS1	P23381	489809	478810	278249	685230	424898	359375	571417	657647	406177	824536	483952	188588	328468	372886	356163	368294	353132	627981	399125	375433	468564	537241	289041	499375	556384	458324	326133	436875	448919	539117
WDR49	Q8IV35	523089	1430000	875544	997838	684517	675030	528970	648862	2330000	1710000	735825	984256	1930000	1380000	276799	1010000	402764	1020000	667223	1400000	1620000	1300000	969030	834476	1300000	293804	556480	293804	293804	293804
WSCD1	Q658N2	2190000	1910000	1920000	1600000	1570000	1570000	3330000	1570000	1760000	1570000	2030000	692263	692263	692263	692263	1170000	2050000	2090000	692263	692263	1280000	1790000	511539	1510000	511539	1450000	511539	511539	815605	511539
XPO1	O14980	658948	31911.3	31911.3	87228.9	31911.3	31911.3	94842	31911.3	156520	138874	31911.3	411425	157589	191775	333565	135997	262669	91266.8	120312	190523	306860	233960	76594.2	274273	110204	76594.2	235499	107716	126537	76594.2
YARS1	P54577	92231.3	92231.3	153256	92231.3	92231.3	92231.3	142591	92231.3	92231.3	92231.3	92231.3	178975	38529.1	185017	90726.8	233532	256306	38529.1	108670	152926	232911	124606	127828	127828	142495	127828	127828	127828	127828	127828
YBX2	Q9Y2T7	1240000	2360000	833527	1830000	4350000	742968	830349	517040	2540000	2880000	1500000	887743	519498	1890000	840371	670034	485771	1480000	2380000	2700000	1690000	3530000	800782	832448	588890	813374	1280000	1680000	2270000	3080000
YKT6	O15498	209173	336548	118497	418885	200127	245318	277407	184950	158538	213395	83060	874435	682964	513556	751037	478352	844442	460177	686017	473054	538966	683581	295135	438944	446762	281146	521827	278556	456014	197974
YOD1	Q5VVQ6	32131.6	32131.6	32131.6	181848	119484	32131.6	32131.6	32131.6	32131.6	74306.4	32131.6	113334	162964	118468	92266.7	104398	91349.6	164021	133007	114935	139482	190906	64489.7	139730	108134	17841.5	178489	55466.8	185059	17841.5
YWHAE	P62258	147430	147430	147430	198942	147430	167053	212972	147430	256156	255229	147430	173592	421376	478356	138890	178900	192791	237634	138890	138890	138890	138890	383825	206685	208770	140624	136810	139175	136810	136810
YWHAQ	P27348	273313	293241	158904	221524	179650	197199	305336	186573	151483	179636	197996	564140	709995	466736	162818	274283	425054	304244	264497	205416	474810	401301	319248	287334	296347	119455	217588	145052	319781	162705
YWHAZ	P27348;P31946;P31947;P61981;P62258;P63104;Q04917	2140000	2010000	1820000	1800000	3650000	1390000	2370000	1620000	3040000	2200000	1940000	2740000	1980000	1600000	513694	1990000	2010000	1770000	1700000	1700000	3030000	2440000	1560000	1670000	3450000	952893	1180000	849319	1490000	1020000
ZG16B	Q96DA0	25832.1	25832.1	25832.1	25832.1	178324	97777	25832.1	25832.1	268457	93850.7	111363	115934	38482.5	38482.5	71041	284766	38482.5	68384.9	38482.5	198929	102850	169069	68264.8	68264.8	218289	138704	68264.8	68264.8	68264.8	68264.8

## Sheet: Table S6
Tab Name	Description
Table S6	The quantification of 219 differential proteins across all 30 samples using DIA-MS
Column Name	Description
Genes	Gene names corresponding to quantified proteins
UniProt ID	UniProt ID corresponding to quantified proteins
C1-C11	The numbers for colorectal cancer patients
H1-H11	The numbers for healthy volunteers
P1-P8	The numbers for polyp patients
Genes	UniProt ID	C1	C2	C3	C4	C5	C6	C7	C8	C9	C10	C11	H1	H2	H3	H4	H5	H6	H7	H8	H9	H10	H11	P1	P2	P3	P4	P5	P6	P7	P8
A4GALT	Q9NPC4	127119	125225	175217	133809	166835	89534.7	94089.4	198388	151339	178896	89534.7	154097	232902	184798	305716	227078	176030	233154	169573	212315	224537	152627	244964	219081	229808	212791	211669	280429	67787.2	292368
ACTB	P60709;P62736;P63261;P63267;P68032;P68133;A5A3E0;Q6S8J3;P0CG38;P0CG39	9030000	9270000	8440000	6980000	14900000	7840000	12600000	10300000	10400000	9740000	8360000	8120000	6410000	7370000	4830000	7160000	6260000	9320000	6600000	4440000	9370000	6340000	8260000	7590000	18100000	6250000	3920000	8210000	6680000	5310000
ADAMDEC1	O15204	65147.7	179990	132888	65147.7	92272.7	142103	171077	117049	65147.7	93902.6	65147.7	178424	367516	184289	92743.4	125055	143180	143705	152517	92743.4	200622	92743.4	237210	253581	114616	196079	114616	221444	176573	440106
ADGRG6	Q86SQ4	1930000	1370000	1850000	2300000	1380000	2580000	1660000	2490000	1550000	2120000	1630000	1510000	1560000	777135	1300000	1710000	1290000	1150000	1560000	1260000	1520000	1480000	2050000	1530000	1690000	1850000	751049	2400000	2540000	3200000
ADH4	P08319	2460000	1390000	1820000	1660000	1930000	1940000	1270000	1730000	593503	3340000	492116	733433	7320000	1240000	2760000	3070000	1420000	728842	1670000	922831	1370000	574649	3550000	7920000	5490000	1670000	15800000	2960000	3080000	2700000
AHSP	Q9NZD4	98134.4	183602	135296	247704	80685.6	96411	81836.3	80685.6	80685.6	219822	80685.6	561284	1710000	399315	107040	180222	225794	301116	284049	266238	716924	497092	181448	121522	129998	204948	295141	138417	965294	177065
AK1	P00568	249303	249303	249303	249303	249303	249303	336161	249303	249303	249303	249303	758859	346537	353646	264606	395173	508358	261402	433848	324723	452047	346243	331709	494425	292225	355865	565817	181373	262219	129295
ANGPTL8	Q6UXH0	314255	379710	350919	91707.9	407497	407489	91707.9	627176	688843	895335	91707.9	581580	555102	716961	792929	418730	766593	226527	245966	226527	379482	272992	1270000	1500000	402935	507272	980237	1690000	1290000	978133
ANTXR1	Q9H6X2	4090000	3530000	2630000	3210000	3220000	2440000	2000000	3160000	4070000	3550000	2170000	5320000	4040000	7350000	9740000	6300000	8880000	7390000	8570000	4710000	4760000	4480000	4650000	4030000	4540000	8940000	4170000	7440000	3830000	6990000
ANTXR2	P58335	2820000	2470000	1990000	1980000	2520000	1430000	1930000	2480000	3550000	3760000	2250000	5250000	3730000	6060000	7310000	4400000	6610000	5720000	9150000	4500000	5410000	3550000	4590000	2850000	3550000	8350000	4870000	5880000	3290000	5440000
APCS	P02743	1430000	1950000	2290000	2150000	1810000	1920000	1910000	1450000	1820000	1740000	1720000	1350000	1290000	1210000	1100000	1140000	905438	1090000	1150000	1320000	1740000	1450000	1450000	1360000	1570000	953094	1330000	1240000	1020000	1050000
APOA1	P02647	2400000000	2460000000	1770000000	1960000000	3390000000	2140000000	1480000000	1620000000	1680000000	1630000000	1480000000	1970000000	3200000000	3070000000	5440000000	3240000000	2800000000	3060000000	2830000000	2790000000	1930000000	2680000000	3150000000	2600000000	2030000000	3920000000	3690000000	3990000000	1770000000	4330000000
APOA2	P02652	185000000	255000000	172000000	316000000	285000000	227000000	162000000	177000000	259000000	400000000	188000000	195000000	357000000	350000000	497000000	315000000	196000000	301000000	210000000	375000000	334000000	311000000	296000000	421000000	361000000	384000000	442000000	401000000	358000000	248000000
APOA4	P06727	166000000	115000000	176000000	78200000	311000000	195000000	192000000	196000000	97600000	136000000	136000000	301000000	618000000	547000000	666000000	454000000	365000000	312000000	499000000	538000000	498000000	427000000	597000000	573000000	155000000	739000000	589000000	685000000	216000000	777000000
APOC4	P55056	2290000	2350000	1830000	3210000	3710000	2750000	1240000	3870000	1650000	1330000	1080000	2020000	1990000	1690000	5900000	2540000	1850000	2500000	2490000	1750000	2980000	1790000	1320000	1000000	1100000	1670000	3550000	1330000	1130000	861865
APRT	P07741	148194	148194	184960	228463	148194	148194	148194	148194	148194	148194	148194	759183	632817	422262	228338	339654	489177	162165	546935	162165	221163	162165	88220.6	510904	264389	88220.6	545039	219452	88220.6	88220.6
AQR	O60306	466629	453345	1260000	869687	275637	512878	855103	565393	1020000	813760	825990	595525	80153.6	80153.6	178671	375058	229853	527950	433301	371378	761361	450291	492456	284837	761748	284837	284837	284837	2470000	2030000
ARF1	P84077	2750000	2560000	2690000	4990000	2290000	3340000	4220000	2360000	1790000	3290000	1860000	10200000	6540000	6240000	6440000	5080000	7490000	3800000	6550000	5630000	7980000	8690000	3740000	8060000	6850000	3250000	8930000	4370000	7450000	3850000
ARF5	P84085	183850	183936	114050	247200	245721	140225	185422	116799	114050	138502	114050	569259	686153	348105	381338	243399	580256	150936	252179	129678	307772	340436	262552	378561	532787	196745	328407	268250	341971	221564
ASPN	Q9BXN1	1850000	2840000	2570000	2050000	2880000	2310000	1530000	1880000	3480000	2160000	2350000	2000000	3970000	4510000	3200000	3200000	4090000	4100000	4260000	3300000	2670000	2610000	3150000	3330000	2700000	3600000	2330000	6570000	2940000	5020000
B2M	P61769	25867.3	55013.2	25867.3	25867.3	25867.3	25867.3	25867.3	110413	87223.7	25867.3	25867.3	92209.2	233400	277548	175721	44949.8	31772.3	386401	31772.3	31772.3	31772.3	97104.1	139596	9153.73	9153.73	274547	115143	113657	30434.7	40661.8
BCHE	P06276	3330000	3390000	4740000	5630000	3430000	2630000	2060000	3930000	3810000	8700000	3350000	4360000	14900000	11200000	14300000	6690000	6430000	12400000	5350000	15900000	20200000	9650000	9360000	3830000	8170000	13200000	16700000	3050000	17200000	43900000
BLVRB	P30043	2050000	3770000	2460000	4560000	1980000	2710000	5510000	2750000	1530000	3020000	1250000	11600000	7310000	8200000	4350000	6570000	8240000	5430000	12000000	5310000	8070000	6600000	3410000	9450000	3980000	3950000	6630000	4330000	5690000	2220000
BNC2	Q6ZN30	109000000	151000000	95200000	132000000	141000000	110000000	77700000	69700000	63000000	109000000	55000000	91700000	143000000	88800000	45800000	89500000	75200000	76900000	72000000	89200000	94400000	71600000	157000000	113000000	87000000	152000000	104000000	111000000	141000000	191000000
BPNT2	Q9NX62	13831.7	13831.7	21296.5	13831.7	13831.7	13831.7	13831.7	37935.8	13831.7	16744.4	13831.7	18469.3	18469.3	40983.8	51326.4	47307.2	25559.7	47639.7	18469.3	22814.2	25399.5	43624.3	10730	10730	10730	70799.8	17933.4	10730	10730	10730
C1QB	P02746	8310000	5980000	3960000	4980000	5590000	5610000	5640000	6130000	6080000	3840000	8940000	2560000	3190000	4770000	5350000	4730000	3320000	4540000	5180000	6200000	3700000	5100000	3280000	7710000	3990000	3490000	2930000	3180000	3390000	4550000
C1R	P00736	343000000	464000000	392000000	434000000	354000000	356000000	456000000	326000000	359000000	338000000	357000000	272000000	296000000	358000000	173000000	342000000	259000000	301000000	312000000	291000000	276000000	306000000	388000000	352000000	417000000	325000000	327000000	353000000	389000000	352000000
C1S	P09871	216000000	235000000	232000000	192000000	161000000	206000000	250000000	206000000	131000000	167000000	180000000	132000000	147000000	159000000	42100000	181000000	148000000	193000000	153000000	138000000	158000000	117000000	136000000	134000000	175000000	101000000	125000000	103000000	171000000	94300000
C2	P06681	5260000	7270000	5730000	5970000	8180000	7320000	9140000	5660000	5710000	6550000	7750000	4300000	5760000	5240000	3500000	5620000	4490000	6000000	6170000	5670000	5410000	5100000	5920000	5280000	5540000	5400000	5930000	5250000	5320000	6050000
C5	P01031	5960000	9060000	9560000	10100000	8400000	8940000	12400000	7790000	8790000	7370000	8060000	6070000	7520000	5530000	5680000	5830000	4950000	5380000	6470000	6070000	7930000	6140000	5690000	6120000	7650000	6560000	8130000	8240000	4860000	5960000
C8A	P07357	999802	2060000	2270000	1670000	1970000	2260000	2210000	2150000	1740000	1480000	1910000	749170	671914	1300000	643515	957081	1130000	1080000	1500000	1990000	1150000	888143	862525	853143	1240000	1850000	665190	712167	1410000	1640000
C8G	P07360	666490	942089	1760000	1370000	2540000	1750000	1250000	1850000	1740000	1680000	1150000	647659	482385	856628	737455	848096	537803	1290000	1020000	562459	1040000	1140000	1000000	1180000	953329	354692	678290	1190000	1530000	1830000
CA1	P00915	12213	12213	12213	12213	12213	12213	79203.4	12213	12213	81874.6	12213	489396	184283	138952	322530	129881	214300	52472.2	160723	145223	167203	52472.2	142885	1100000	251767	85196.2	106411	107364	85196.2	85196.2
CAND1	Q86VP6	359578	611988	756353	790721	662636	738349	946907	611177	615681	888412	581099	1550000	1290000	1040000	959599	955759	1070000	876845	1150000	1090000	1800000	1340000	707312	1080000	944746	615289	1450000	922079	1310000	575147
CCDC71L	Q8N9Z2	4150000	4150000	4150000	4150000	8140000	6470000	5540000	6210000	4150000	4150000	6990000	9960000	15100000	14900000	23000000	1600000	13600000	9180000	19000000	18000000	14200000	16000000	19500000	13800000	3890000	35700000	32200000	19900000	6060000	15500000
CCT3	P49368	284826	509311	190400	505679	136596	136596	276292	136596	136596	257078	147908	1040000	731668	564729	1160000	572729	452521	494718	544655	448485	943044	790536	313904	1620000	437650	246398	666145	455797	626052	236953
CCT4	P50991	556886	285892	262878	658219	330583	197112	366040	248261	134819	300898	134819	1450000	1060000	819842	1610000	799289	822256	572338	636445	589594	890067	857070	435338	1750000	688221	675490	916666	743292	577027	330751
CCT5	P48643	270216	195772	222460	488838	66058	196390	338197	87727.3	66058	193166	110949	1180000	749316	750198	1190000	760155	791998	510215	502460	451275	814756	962705	522179	1470000	584682	474257	722752	665332	544369	222038
CCT6A	P40227	970093	658415	252535	586427	224139	240879	317242	146240	151889	260172	179125	1690000	1050000	875501	2120000	877075	847345	677644	693224	686763	1060000	1010000	651339	2070000	623538	516429	781834	826251	711554	208614
CCT8	P50990	335544	496583	146873	657375	87214.3	188085	318117	94042.8	87214.3	221520	233955	1470000	917455	824742	1760000	642119	772448	615902	639281	650081	1210000	1240000	480286	2010000	545786	549798	944476	682163	790261	249423
CD248	Q9HCU0	98673.8	53260.7	100550	86470.4	51188.2	51188.2	97717.9	99362.3	142162	132219	51416.4	94644.6	153927	180890	243035	256718	223387	249167	236430	110288	195574	77006.6	119769	148669	176548	286913	102592	579831	108922	116927
CD99	P14209	55594.3	27444.6	60268.6	27444.6	27444.6	27444.6	27444.6	27444.6	27444.6	41048.5	27444.6	124782	36165.1	32058.6	115997	75826.8	156745	32058.6	58929.2	97667.8	131879	81334.7	92091.8	122675	49637.8	49637.8	91535.6	49637.8	49637.8	49637.8
CDH11	P55287	1220000	705781	806447	682991	646128	1010000	954059	665992	847369	875463	902124	750250	484254	864045	516478	860243	906500	1060000	728453	1040000	789531	1370000	677700	838490	647470	528323	367685	513308	668557	647653
CDH18	Q13634	335316	1270000	788467	998184	643349	499298	1510000	335316	1430000	831503	991317	270067	270067	270067	270067	695814	270067	463718	688129	492655	660666	438739	514035	514035	514035	514035	514035	514035	514035	660328
CDH2	P19022	742053	420299	647192	629627	427412	440790	653491	603457	430836	482678	799918	341107	357548	224684	254386	400239	339103	550405	419104	372503	539813	266237	504164	642106	537751	518782	576798	483457	681029	453403
CDHR2	Q9BYE9	192103	150340	288185	355007	269207	150340	377055	150340	150340	193059	824801	133258	133258	133258	133258	133258	133258	133258	133258	133258	197170	133258	517393	387998	642284	323268	287140	178531	519697	103736
CFB	P00751	6980000	7850000	8920000	6080000	9650000	7770000	12900000	9540000	5570000	6220000	7230000	6080000	5050000	5660000	5660000	4580000	5710000	4120000	5640000	7750000	5780000	4250000	6800000	10000000	7370000	5100000	5940000	5410000	6400000	6380000
CFH	P08603	23800000	19200000	32200000	14200000	9960000	21700000	32500000	21100000	26100000	28100000	25100000	15400000	11400000	11300000	5460000	10600000	8730000	14100000	9560000	16200000	19500000	16600000	16400000	12100000	19500000	6560000	7600000	7050000	17300000	8570000
CFHR1	P36980;Q03591	3560000	2870000	4650000	2640000	2710000	2280000	6990000	3150000	6670000	6330000	7220000	1820000	1640000	824149	2370000	1550000	1790000	2540000	1710000	1790000	5250000	4680000	3640000	2780000	3040000	719282	1610000	1930000	4160000	3230000
CFHR5	Q9BXR6	653864	1210000	2130000	1020000	1090000	1040000	1620000	927689	1130000	845623	1350000	812610	588003	542252	974480	713354	489053	724255	730391	1060000	942658	854025	1090000	797844	700926	776303	529195	1040000	1110000	1020000
CFL1	P23528	559617	399537	245680	626360	408474	341504	569969	305453	245680	326256	245680	1520000	844082	838067	888088	795498	1740000	655267	722381	509510	1040000	774044	474035	816731	1070000	280161	376263	311757	613412	478426
CHMP1B	Q7LBR1	37902.8	283083	193816	187108	37902.8	37902.8	95179.5	77601.8	37902.8	113197	37902.8	368895	362154	237527	196302	290798	419397	142453	249409	214355	236890	145838	71800.9	410787	71800.9	113408	341050	119250	108045	71800.9
CHMP2A	O43633	78933.8	78933.8	99482.8	78933.8	78933.8	78933.8	78933.8	78933.8	78933.8	120396	78933.8	374359	447169	162170	164980	166914	297964	162170	222339	162170	263832	164511	102256	425178	102256	102256	115768	102256	121606	102256
CLIC1	O00299	241437	150695	237135	381598	474294	150695	409290	155841	167297	153370	150695	561170	712885	352996	528944	343588	819485	343588	482086	343588	520048	343588	110466	512906	262953	110466	384073	110466	110466	110466
CLIP1	P30622	180669	431079	277541	267530	180669	275754	289363	281957	204638	183485	230018	163719	215216	286738	143844	204495	191213	220199	145860	130843	139211	142051	97062.3	94738.9	292456	187351	44432	155255	7247.2	174584
CPN1	P15169	2330000	4950000	2320000	2960000	2420000	2720000	2140000	2560000	1700000	2340000	2310000	2740000	1800000	1520000	2090000	2370000	1800000	2170000	2200000	2130000	1700000	1690000	1420000	1630000	2540000	2080000	1250000	1710000	1640000	980822
CRP	P02741	205399	572375	5940000	1110000	539797	1020000	2590000	506553	346161	205906	2310000	133877	133877	133877	410141	133877	133877	133877	133877	133877	202950	133877	168146	155179	777437	329822	120276	120276	298032	371454
CTSD	P07339	917813	574935	1110000	863511	996805	1050000	726343	951973	1210000	775400	1180000	492939	984158	666589	489856	798763	453874	689346	644861	610176	766541	531638	1170000	1110000	1180000	642817	1290000	846483	996828	992781
CUL3	Q13618	34661.3	88062.1	58889.6	105097	34661.3	53120.8	97684.8	95847.6	34661.3	50994.1	34661.3	287728	139167	121048	122751	135624	260208	61422.3	142214	69911.7	143192	85135.3	32988.3	208035	80974.9	49819.8	150483	20448.5	57560.8	20448.5
DDI2	Q5TDH0	298059	443237	252662	614645	205204	283873	389187	205204	233226	496415	205204	1250000	621399	845047	636565	637177	731795	594004	720859	627525	1090000	1050000	331595	1280000	356047	236689	426398	236689	925184	324843
DLST	P36957	496254	596553	456983	534758	586722	557239	514479	712473	410431	373320	352347	678816	713614	586701	1350000	579461	1000000	531892	754234	619649	539181	597645	705186	742758	577842	1410000	1200000	1270000	577842	577842
DNM2	P50570	140226	287597	116032	225734	116032	232974	162860	127511	275690	207287	116032	455740	278851	377094	429972	232630	335739	199272	357777	237051	310861	365183	228344	306645	338009	140974	321336	175779	226398	140974
DPP4	P27487	361368	415539	299921	177858	203100	196443	299191	392991	338324	265047	173081	539768	547073	617305	421390	535320	641690	562659	656869	413893	443266	264293	714792	587174	386526	829662	670075	647902	295933	415254
DSC3	Q14574	850580	672464	319573	397033	281588	496032	519448	281588	609763	562073	281588	501394	193080	193080	193080	256228	427812	488563	193080	615900	755418	890916	117936	489913	269385	146505	152684	319991	196609	117936
DSG2	Q14126	6660000	4770000	4790000	4240000	4390000	5260000	5010000	6240000	9240000	6520000	7370000	4910000	3220000	4650000	1810000	4310000	4510000	7620000	5310000	7450000	6130000	9470000	5160000	3300000	3400000	4740000	2230000	4130000	4050000	4130000
EEF1A1;EEF1A1P5	P68104;Q5VTE0	2180000	1240000	1360000	2960000	3190000	2120000	1780000	1370000	1450000	1600000	1380000	4540000	4850000	3270000	2790000	2120000	3940000	2230000	1900000	2410000	4860000	3710000	1940000	3600000	4970000	2070000	4170000	2120000	4020000	2030000
EFHD2	Q9BUP0;Q96C19	176307	155165	147371	211881	126932	165439	240083	176626	194870	145480	127652	274663	183717	221363	176694	212379	219908	181950	207144	176694	251290	241975	171568	129011	205010	166162	107279	92054.5	197037	92054.5
EIF5A	P63241;Q9GZV4	535824	188394	237977	347260	93007.9	343581	401577	136830	79154.9	271755	109790	898437	372757	549908	607834	498512	566560	485130	402697	362804	589261	574062	288606	405812	623889	189034	126056	166468	417515	64874
ENO1	P06733;P09104;P13929	3380000	4260000	3390000	4040000	8070000	3010000	2580000	3550000	2480000	4430000	1580000	6240000	7750000	4550000	4800000	4100000	9490000	3360000	5670000	3590000	8620000	3210000	2690000	3650000	4260000	2070000	3560000	2560000	3280000	3560000
ENPP2	Q13822	2270000	2300000	2690000	1160000	2060000	2430000	2110000	2610000	2110000	1090000	894496	4780000	1650000	3370000	1090000	3100000	5900000	3530000	5050000	2250000	1580000	2740000	972396	664656	1050000	1100000	1110000	921985	708670	1100000
ETF1	P62495	326499	377936	255743	507123	311928	353532	635250	373034	255743	255743	264363	645339	804964	577005	588635	479200	671625	329257	583507	438825	435158	433388	705485	562039	629581	159529	620156	631636	358705	420082
F8	P00451	411287	437336	476492	565407	487716	444952	499097	690378	536820	230964	625959	501043	435498	308273	350848	415586	390574	335928	335864	299297	339417	298575	414957	291214	278685	303494	113820	446924	247782	277429
F9	P00740	197000000	244000000	313000000	278000000	218000000	311000000	266000000	212000000	266000000	208000000	212000000	194000000	215000000	192000000	74000000	182000000	163000000	130000000	163000000	200000000	214000000	200000000	193000000	137000000	271000000	145000000	128000000	143000000	234000000	167000000
FAM114A2	Q9NRY5	158445	158445	175245	477653	158445	158445	158445	224715	158445	339462	158445	965665	439100	537560	274723	280560	372895	486838	340641	274723	569902	521434	73442.3	474756	564652	230032	599766	272054	242656	73442.3
FBLN7	Q53RD9	335164	217530	366814	392585	441151	290475	425363	404470	371698	459549	272590	330077	400566	466424	997666	592644	354672	454235	502552	500546	502199	324580	613997	658033	528198	866979	473070	662830	351622	721851
FBXO7	Q9Y3I1	167102	235407	167102	311399	167102	219202	223293	171323	167102	269653	167102	551046	338397	395686	246436	253095	360286	274982	435389	411712	550601	508232	286398	598151	129181	106076	419696	322426	396391	189245
FCGBP	Q9Y6R7	183503	47706.6	117632	47706.6	63792.5	52806.2	47706.6	58578.5	47706.6	54780	74311.4	56592.7	43898.2	58204.3	43898.2	43898.2	129695	95677.6	103620	52625.4	43898.2	43898.2	8026.19	8026.19	8026.19	8026.19	8026.19	86348.7	8026.19	19097.2
FGFBP2	Q9BYJ0	127092	127092	127092	127092	127092	127092	127092	127092	127092	127092	127092	38836.2	38836.2	38836.2	38836.2	38836.2	38836.2	38836.2	217396	38836.2	38836.2	38836.2	99620.2	99620.2	156435	278612	99620.2	184679	190059	335188
FN1	P02751	1670000	1450000	1460000	1140000	1170000	1180000	1290000	1450000	1600000	1330000	1390000	1420000	1410000	1290000	1590000	1410000	1300000	1410000	1710000	1690000	1740000	1540000	2510000	1670000	1730000	1600000	1210000	3380000	2840000	3180000
GAS6	Q14393	64344.5	31889.3	79564.6	31889.3	31889.3	43102	31889.3	31889.3	31889.3	31889.3	31889.3	84757.6	36930.6	36930.6	111091	81010.1	81085.5	90297.3	92148.4	36930.6	75759.3	78237.4	44992	44992	117157	133747	44992	44992	44992	44992
GCA	P28676	138272	252625	163774	251278	99589.7	155841	169512	194048	319275	126889	120005	1330000	1230000	451464	178435	292306	1860000	229327	308667	350179	766219	329488	152768	176490	208578	279373	180931	162593	332622	269482
GCLC	P48506	35968.1	35968.1	35968.1	78239.3	35968.1	35968.1	100806	35968.1	35968.1	35968.1	35968.1	223293	144300	76753.3	58398.5	82789.7	58398.5	58398.5	116262	77140.6	182688	90298.6	34524.1	59246.7	90980.7	34524.1	94785.8	34524.1	34524.1	34524.1
GCLM	P48507	317895	674540	284495	826540	339925	459319	708543	221796	356540	748875	3480000	1790000	1230000	1640000	1300000	1240000	1530000	774384	1250000	1500000	1530000	1980000	626606	2070000	997653	672383	1680000	833987	1520000	851370
GMPR	P36959;Q9P2T1	230708	390420	230515	588395	58091.3	227311	522054	228420	58091.3	623665	58091.3	1550000	1050000	744375	603412	579304	956632	398996	952729	558784	1380000	302921	583500	1440000	437576	197191	732903	265843	1770000	409788
GPX3	P22352	9560000	24400000	11800000	16600000	18700000	4360000	6990000	14100000	15900000	14600000	5380000	32700000	13300000	20700000	17000000	14900000	31400000	17200000	25600000	17700000	29400000	23400000	13100000	11200000	9710000	12700000	9400000	10300000	9040000	11200000
GXYLT1	Q4G148	134044	50680.5	50680.5	116231	50680.5	118392	93669.3	119623	176172	198248	50680.5	414071	253611	139201	126726	161806	147589	173991	272133	126726	441718	126726	203140	38666.2	112298	38666.2	171237	125919	38666.2	94615.5
H1-2;H1-3;H1-4	P10412;P16402;P16403;P22492;Q02539	1970000	398877	398877	398877	938081	398877	479911	398877	398877	398877	398877	1740000	596738	902996	952530	980747	1210000	897370	1170000	596738	1650000	904462	328976	328976	597269	328976	1110000	820501	496254	328976
HAGH	Q16775	283041	701220	461411	937670	115563	304697	435511	330273	176016	742044	115563	3350000	1600000	1250000	1450000	1010000	2590000	875476	1940000	1050000	3380000	1240000	365459	1160000	406515	263594	1150000	504296	1090000	419380
HBD	P02042	3930000	3930000	3930000	5970000	3930000	5290000	3930000	3930000	3930000	3930000	3930000	5680000	7380000	4950000	13300000	8510000	6900000	5620000	4950000	7620000	5740000	4950000	10200000	10200000	10200000	10200000	10200000	12500000	10200000	10200000
HLA-C	P10321	552140	552140	864579	552140	552140	552140	770031	552140	552140	899982	552140	244588	244588	1040000	244588	244588	244588	762649	244588	244588	371715	244588	881643	957361	456888	910612	456888	456888	525698	940961
HPX	P02790	316000000	518000000	397000000	405000000	357000000	387000000	461000000	404000000	295000000	372000000	392000000	309000000	341000000	316000000	98600000	333000000	257000000	289000000	266000000	376000000	311000000	421000000	261000000	268000000	295000000	187000000	214000000	141000000	277000000	310000000
ICOSLG	O75144	53592.8	38496.7	23382	20443.8	23885.3	38150.7	31602.1	53061.8	47223	44648	33708.2	21065	9687.37	9687.37	9687.37	27401.8	9687.37	65083.9	29820.3	18976	17889.8	26923.2	14897.6	14897.6	41186	18819.9	14897.6	14897.6	20601.9	14897.6
IDH1	O75874	257205	437388	360053	343859	731572	389059	408553	441551	257916	466990	247521	865188	1400000	794268	904391	1220000	1280000	568969	808408	430588	963492	368055	588987	855599	1070000	647430	742459	965610	431719	429970
IGF2R	P11717	1740000	1080000	2010000	2720000	1360000	1050000	1490000	1870000	983345	1290000	1470000	950086	1250000	1200000	938727	872886	838033	1030000	1110000	1010000	1130000	1060000	1380000	900103	2440000	1560000	1640000	1260000	1140000	759161
IGHV2-26	A0A0B4J1V2	588953	313473	313473	313473	373816	313473	560610	313473	319878	810150	1240000	62906.6	62906.6	62906.6	728780	62906.6	62906.6	62906.6	452810	62906.6	62906.6	62906.6	484163	986847	526222	174667	449646	800012	174667	174667
IGKV3D-15	A0A087WSY6	271395	220998	220998	267084	220998	220998	398885	220998	293340	343097	403379	209074	209074	530249	209074	257497	287527	209074	209074	220899	209074	277406	363897	448556	699105	683219	320138	432240	521419	320138
IGLV1-47	P01699;P01700	40452.7	40452.7	40452.7	40452.7	40452.7	150815	40452.7	40452.7	40452.7	1070000	40452.7	81842	81842	81842	81842	81842	81842	81842	184945	81842	81842	81842	143948	538182	1070000	86760.6	86760.6	4740000	86760.6	819124
IHH	Q14623	124231	124231	124231	124231	559955	124231	124231	124231	124231	124231	124231	410455	539519	309736	696696	360504	454482	527854	145706	145706	145706	145706	207339	207339	207339	727466	207339	509261	207339	333097
IL1RAP	Q9NPH3	524721	832889	464378	763757	825088	835036	695740	894816	752660	754404	512105	612651	637933	750760	430686	531847	704138	395365	782612	633637	543636	566769	683527	472713	581832	504322	391885	538876	436277	492619
IL7R	P16871	37214.1	37214.1	37214.1	37214.1	37214.1	37214.1	62398.2	64798.1	97740.1	109934	137363	212354	48379.6	197196	48379.6	48379.6	197645	130839	163630	205612	48379.6	248070	125684	125684	125684	125684	125684	125684	125684	125684
INHBB	P09529	482860	515855	1100000	440990	306272	309875	755679	479537	1220000	507719	917891	436087	226948	191400	191400	312571	248471	205002	560479	319134	526535	540186	294869	279387	434989	218851	326053	175424	706254	175424
INSL3	P51460	143249	143249	239124	332221	143249	143249	143249	143249	143249	188649	143249	189150	189150	189150	189150	189150	189150	189150	189150	189150	480842	189150	149495	90916.3	112034	63350.9	98576.3	63350.9	128705	63967
IPO5	O00410;O60518	230792	103944	103944	103944	103944	103944	127621	103944	689527	909140	103944	442656	496893	127956	146576	153594	376742	157487	226874	596503	415844	127956	120460	150882	146608	120460	372009	120460	124199	120460
ITGA11	Q9UKX5	291414	127174	182953	127174	197675	127174	127174	292032	299131	287625	127174	577697	266735	589950	499406	466701	568315	628543	545654	317674	322036	320381	470312	247599	333116	457319	333513	390263	319504	493030
ITGA2	P17301	396733	397634	214479	261472	315678	351442	311015	273076	222349	239920	178213	491867	373500	518283	498691	609962	480532	483417	654114	363928	281772	310885	293144	291047	294612	631441	315195	311876	234012	301339
ITGAV	P06756	63518.9	12303.9	12303.9	12303.9	12303.9	12303.9	12303.9	68984.6	12303.9	12303.9	13555.4	95413.1	62139.8	25219.8	25219.8	60959.1	132366	66723.2	57554.8	25219.8	28207.5	25219.8	126947	49297.7	34579.5	97291.3	34579.5	34579.5	34579.5	34579.5
ITGB1	P05556	1430000	965842	1290000	1100000	1330000	1050000	969930	1450000	909436	1000000	843517	1960000	1840000	2050000	2160000	1840000	2410000	2000000	2550000	1100000	1090000	996695	1450000	1470000	1510000	2310000	1340000	1970000	927320	1480000
ITGB2	P05107	231074	55591	137512	55591	155216	187154	112512	331636	265940	165314	138253	267836	400137	259638	387859	371445	529849	312136	323222	181701	247692	214127	254743	186636	128145	414732	190656	331556	260636	223366
ITIH3	Q06033	10700000	20800000	21000000	16800000	15300000	18100000	24400000	23000000	27000000	13000000	17300000	6560000	8400000	13500000	5310000	16700000	7400000	9800000	18600000	9430000	11500000	8170000	5840000	14900000	13600000	10700000	6820000	17700000	6750000	11800000
KIAA1958	Q8N8K9	2470000	9660000	993603	4560000	2240000	707778	1370000	876186	1270000	1890000	1350000	2390000	2940000	4160000	633832	501806	489308	917958	1030000	1370000	930465	1340000	639812	877621	1220000	418724	724366	809383	1180000	520838
KLKB1	P03952	16700000	20800000	17700000	27700000	25900000	16900000	15800000	12400000	17300000	11800000	9860000	8660000	18200000	17900000	5240000	17100000	13400000	21200000	8680000	10700000	12000000	7830000	12100000	6800000	15200000	7540000	14300000	8560000	9610000	3930000
KNG1	P01042	571000000	527000000	715000000	846000000	670000000	576000000	589000000	435000000	562000000	487000000	333000000	355000000	542000000	481000000	314000000	682000000	542000000	732000000	479000000	358000000	400000000	312000000	553000000	508000000	456000000	408000000	465000000	369000000	315000000	205000000
KPNB1	Q14974	988578	113617	217069	350533	113617	126432	377387	113617	113617	377054	314009	722670	540564	388990	264863	479161	636604	327992	395074	502307	625024	465878	305289	760246	441311	176507	549969	200632	448088	176507
LBP	P18428	329000000	562000000	843000000	739000000	749000000	682000000	634000000	400000000	585000000	564000000	870000000	217000000	433000000	327000000	458000000	264000000	276000000	311000000	445000000	405000000	467000000	433000000	295000000	371000000	334000000	389000000	465000000	319000000	516000000	624000000
LCA5L	O95447	44405.2	37827.3	96460.8	32512.3	142849	32512.3	47967.6	60383.1	46995.5	32512.3	64227.8	131013	260724	201078	156694	186078	130069	91547.6	308262	361411	291107	206810	327653	243186	25548.6	323514	316862	202479	49342.2	241480
LCP1	P13796	6780000	4040000	6780000	4170000	3820000	5750000	7190000	7610000	8080000	7650000	6370000	2850000	2350000	3550000	852119	3130000	2550000	6720000	3180000	3300000	5720000	5640000	4760000	2060000	4380000	2260000	1830000	1880000	6660000	3400000
LIPG	Q9Y5X9	897823	715926	869469	887658	1410000	1020000	719294	968080	1050000	541995	833937	490332	694807	442679	900869	813472	624189	598644	676839	648484	601022	684195	705802	577507	766910	980014	565050	573744	603402	717739
LOXL1	Q08397	180220	230059	164019	96660.7	96660.7	214250	96660.7	185174	322790	136909	170903	291517	207114	338397	436424	302284	241946	232829	561525	432643	235101	348411	142198	259190	309788	580059	142198	215826	184566	390233
LPA	P08519	5200000	8530000	6390000	6920000	2570000	18200000	4010000	5850000	6910000	10000000	7000000	2520000	799695	3890000	1900000	6510000	1990000	3620000	5700000	2140000	5600000	2110000	906032	3070000	3280000	867401	89894.5	1440000	927864	6870000
LRG1	P02750	340178	229733	273869	238792	161079	507438	386387	256836	161079	183318	203406	214860	160552	160552	160552	256670	160552	160552	160552	213696	162257	246675	223355	407101	223355	518418	362571	223355	223355	223355
LTBP1	Q14766	6090000	381963	1020000	3530000	2020000	2360000	3380000	1970000	330498	801567	2570000	1350000	741661	368779	643981	713804	377434	549039	443242	209083	669006	322947	611416	372233	46586.2	434032	412723	467573	1450000	2280000
LY96	Q9Y6Y9	44048.2	19223.7	19223.7	44225.1	21267.4	28864.6	75393.5	19223.7	31301.7	19223.7	23609.8	12127.1	9549.41	9549.41	9549.41	28820.2	9549.41	21532.6	16979.5	9549.41	9549.41	24640.9	52256.9	52256.9	52256.9	52256.9	52256.9	52256.9	52256.9	52256.9
MADCAM1	Q13477	949315	251478	801174	575463	358841	577311	352499	386911	251478	359394	526567	948540	1590000	906890	910558	883067	1080000	1100000	1030000	599254	697333	315005	974019	306430	806019	1080000	2330000	982157	1120000	1530000
MAN1B1	Q9UKM7	51367.1	81434.4	51367.1	51367.1	51367.1	51367.1	79825.2	67339.1	51367.1	51367.1	51367.1	69806.7	237886	70675.3	65042.8	108383	70884.4	60367.6	74577.7	62887.6	60010.8	111657	28002.6	28002.6	28002.6	66880.9	28002.6	47527	28002.6	28002.6
MAN2A2	P49641	132285	105430	151556	126307	105430	115626	127823	105430	152924	120537	108826	112149	69001.3	69001.3	69001.3	69001.3	108314	128724	146955	104127	144298	69001.3	88770.5	120038	28650.4	42735.1	28650.4	92683.2	78094.3	79625.7
MAP2K2	P36507;Q02750	34966.4	34966.4	34966.4	159851	34966.4	34966.4	43456.6	41635.4	34966.4	34966.4	34966.4	192805	254721	183957	160295	141547	191786	65387.7	253827	65387.7	191309	221449	60804.3	101987	74792.5	61222.3	145694	60804.3	140634	88919.4
MAPK1	P28482	90183.6	90183.6	90183.6	159498	90183.6	117887	90183.6	90183.6	90183.6	90183.6	90183.6	270803	203009	338010	93658.7	238458	308546	128726	167992	65234.1	327900	204513	193043	177881	173101	111096	111096	111096	224261	122354
MFAP4	P55083	570922	394748	311669	311669	592887	496909	932708	435410	666622	466778	360638	584793	726089	892551	491694	1220000	1190000	1310000	1130000	491694	635020	692409	980624	145136	613909	1190000	145136	1340000	178362	145136
MGAT1	P26572	4060000	5160000	4370000	5630000	3940000	5040000	7290000	3730000	4460000	3810000	6070000	3020000	4390000	3890000	4010000	3800000	3640000	3760000	3730000	3820000	3800000	3790000	4010000	4220000	4080000	4550000	4050000	3970000	3080000	4130000
MMP1	P03956	814857	186130	299342	374036	215269	467341	476828	361310	186130	186130	186130	104366	104366	104366	104366	228193	104366	104366	193936	104366	250841	104366	223226	223226	242830	223226	223226	223226	223226	243032
MMP9	P14780	614711	806944	1030000	955968	342635	1090000	975389	755611	122890	545673	174524	2290000	2080000	1260000	278321	638712	1440000	1170000	581650	1300000	3060000	1730000	182524	204333	441259	236177	236306	119314	435726	229355
MYOC	Q99972	245684	151057	190125	263435	151057	151057	232146	151057	217769	198497	151057	378498	273366	505370	213575	290392	392042	265633	294112	166120	548604	290223	444976	489470	299151	299714	309210	308169	299151	299151
NAMPT	P43490	427799	612078	458816	1170000	917746	473887	639425	525504	500826	654188	505169	2470000	1850000	899234	1230000	942510	3320000	772159	923654	1040000	1930000	974428	395633	1150000	724545	985487	1160000	909841	964899	559060
NAPA	P54920	643687	1160000	931537	2030000	284504	598250	910587	574681	415142	1220000	284504	3650000	2200000	2620000	1450000	992784	2160000	1330000	2410000	1900000	3100000	2580000	1390000	2780000	1590000	765326	2270000	1320000	3060000	954262
NID1	P14543	1080000	372609	735910	769382	814927	812446	1500000	717598	648643	562954	787139	461552	424430	257803	491667	513460	310471	532562	529054	447400	645467	706940	469053	683236	796791	494598	506158	952779	427364	439984
NOTCH3	Q9UM47	142153	139616	90358	81121.5	108405	156712	163949	152452	74489.7	79770.7	91698	131189	179611	130720	268108	331518	317758	213476	210123	116677	203509	92456.7	342602	276437	208295	532669	186854	323022	126485	289284
NRP1	O14786	507201	449928	509771	336979	315151	228734	490304	445693	370838	521025	431663	445257	388135	385147	148823	204517	337050	453782	273041	365267	210907	299915	334592	378048	241336	360761	248575	325122	67553.7	67553.7
NRP2	O60462	711834	475994	663436	455932	384205	564562	639966	676156	523188	485069	472972	595005	518339	539273	268235	541161	471278	697766	527289	583457	503082	555871	455449	525207	481906	456812	473655	454416	399982	230571
NSF	P46459	132849	386857	190530	557033	42771	206725	619130	205947	277320	259577	74743.9	1420000	771082	808013	844116	487614	994561	559844	767111	766591	1030000	818273	471355	1240000	560688	540497	961174	441041	883738	256170
OGN	P20774	40840.4	40840.4	40840.4	40840.4	40840.4	54446.6	40840.4	40840.4	40840.4	40840.4	40840.4	28361.6	28361.6	28361.6	28361.6	73784.3	75598.8	51483.1	28361.6	28361.6	71521.3	28361.6	77509.7	249272	41567.7	102856	111035	113908	41567.7	41567.7
OXSR1	O95747	77899.5	193244	127577	267186	11097.6	197325	315607	157931	38358.6	134253	11097.6	706633	571346	419517	243312	392962	627099	238818	456309	249953	488393	306519	198303	673153	252537	160691	306950	187196	269911	88192.3
PAM	P19021	292112	308244	284850	385129	289771	392898	346900	321099	334465	414284	314994	484982	361787	383945	648745	364412	433497	529739	388540	573196	563312	471928	359239	300079	283094	473471	455188	458707	496338	392467
PCDHGC3	Q9UN70	263842	173775	211420	209925	151092	223899	384126	229721	158694	99060.6	244164	353903	141593	433117	107837	400631	194096	345095	216724	321550	153796	422704	490913	542312	376552	431219	180788	272113	414368	334334
PCSK6	P29122	954711	461370	566627	650193	290388	571001	688010	421673	432974	385483	668152	288243	335123	311554	127726	384898	241851	275645	254269	259879	312494	379622	507587	541828	640972	336721	234421	473144	666578	742192
PDCD6IP	O75340	20356.6	20356.6	20356.6	20356.6	37192	27082.3	26967.3	34846.7	20356.6	20356.6	20356.6	130010	30986.6	30986.6	71938.5	44667.8	79720.5	47802.5	39246.4	30986.6	72146.8	30986.6	28001.9	145021	65598	13903.5	98854.6	82192.4	13903.5	183802
PDXP	Q96GD0	25340.4	25340.4	42765.9	95230.8	33462.7	89433.3	25340.4	41515.1	25340.4	86090.3	25340.4	177758	147222	106817	78234.9	91983.6	92579.8	67918.9	113340	67918.9	202362	73316.7	36655.8	36655.8	45340.2	36655.8	81997.9	83158.2	129772	36655.8
PFKM	P08237	207073	207073	207073	335206	207073	267473	423360	256885	220036	207073	571278	949352	451041	612214	719580	444642	534674	541606	612247	413658	793986	552360	878189	937208	648457	468771	794023	480627	664873	171410
PGLYRP2	Q96PD5	4590000	4410000	5860000	2560000	2600000	6810000	3070000	4800000	2080000	1680000	2320000	6390000	4730000	4720000	6280000	5550000	15200000	14000000	10400000	4170000	7720000	3930000	1950000	6190000	1430000	2840000	2820000	4110000	1360000	5290000
PGM2L1	Q6PCE3	113791	319197	196784	506621	95171.9	266016	485365	307056	95171.9	224330	95171.9	1200000	866107	811398	708738	480550	1100000	377134	656322	508404	653571	640856	330153	874297	291643	346349	677939	360383	333559	196315
PITPNA	Q00169	135001	135001	270649	344642	135001	193966	245502	346373	246569	225595	231605	566122	461154	376148	181533	268782	487362	335518	422118	384469	502792	392861	250699	338720	234120	142446	383061	467468	284772	142446
PITPNB	P48739	189372	121690	342948	429025	255064	288882	471145	121690	121690	184365	121690	968322	881123	740308	640515	509214	972540	410196	704405	631176	885505	826528	253377	737158	633813	394445	820721	431378	726993	323884
PKLR	P30613	429764	708882	445319	953093	429764	670027	666353	512541	438644	600869	429764	2600000	1460000	1790000	338170	1000000	1480000	867845	1000000	878815	2210000	1580000	613856	1980000	734940	463410	1080000	709888	1870000	348124
PLA1A	Q53H76	477369	720830	945653	871221	439812	590236	872862	607632	558408	442756	674794	570093	411378	279772	423812	370871	416214	259233	386665	759585	306467	434283	537939	437255	614324	391607	365273	743384	365273	409729
PLA2G7	Q13093	776791	1500000	748553	2060000	1930000	1220000	631473	1510000	1080000	1420000	1480000	1700000	1180000	1040000	1990000	1130000	1190000	871308	2110000	1070000	1160000	1530000	1380000	1950000	1530000	1530000	4830000	1650000	2750000	3330000
PON1	P27169	1350000000	2790000000	1690000000	2930000000	1980000000	2270000000	1270000000	1870000000	1590000000	2010000000	1240000000	2210000000	2310000000	3100000000	2170000000	2560000000	3100000000	3270000000	2710000000	2600000000	2480000000	2720000000	2490000000	2440000000	2620000000	2580000000	2560000000	2010000000	2170000000	2200000000
PON3	Q15166	102000000	166000000	81000000	123000000	172000000	145000000	73000000	150000000	109000000	149000000	83300000	166000000	113000000	170000000	186000000	197000000	162000000	162000000	215000000	225000000	168000000	202000000	147000000	117000000	97300000	170000000	138000000	110000000	86400000	180000000
PPBP	P02775	739284	135457	135457	644001	245358	585040	576163	365531	135457	135457	659939	309739	148803	109720	250247	228979	54745.4	87965.9	102767	54745.4	224955	95772.3	179071	86133	68983	68983	68983	68983	132231	246162
PPP2R1A	P30153;P30154	397781	598539	542771	1160000	189152	532106	809562	461854	189152	614046	256396	1700000	1890000	1300000	2580000	1180000	1480000	962886	1460000	943297	1960000	1280000	766627	2150000	596829	799177	1830000	791916	1380000	405779
PROC	P04070	1230000	1770000	1150000	1050000	992426	1630000	954146	1030000	758097	495927	492561	1170000	1330000	1140000	1410000	1370000	1050000	882608	1000000	1180000	722427	1090000	805342	676001	1100000	897815	619331	869467	542007	884817
PRPS1	P60891	474918	1090000	666846	1950000	591570	641836	1250000	716568	743877	1410000	474918	4520000	3720000	2320000	2250000	1140000	2460000	1380000	2600000	1340000	3920000	2470000	1710000	1600000	1060000	509776	3240000	1170000	3230000	1120000
PSMA1	P25786	50085.7	50085.7	77598.3	219450	405792	86758.4	50085.7	50085.7	50085.7	50085.7	50085.7	417775	585018	392177	332609	313537	423184	201882	348597	203048	362699	201882	166913	459643	319810	172120	228238	181505	166913	166913
PSMC2	P35998	734951	168976	38767	96078.3	38767	58986.3	73832.6	51273.5	38767	87224.6	38767	458893	291707	222420	155542	182181	271758	126114	189957	143953	266299	138908	136890	362203	159462	102654	266858	86175.9	227489	76307.3
PSMC3	P17980	35346.6	46292	35346.6	35346.6	35346.6	35346.6	35346.6	35346.6	35346.6	51379.1	35346.6	298614	168681	131305	43963.6	136192	43963.6	43963.6	149674	61655.5	237822	84468.2	111871	272671	82116.3	82116.3	149278	82116.3	128879	82116.3
PSMC5	P62195	147715	36878.1	12010	48360.3	12010	28130.5	12010	12010	12010	12010	12010	153398	74521.8	76574.2	24241.6	63505.1	75377.9	33492.9	61687.8	25513	103937	90355.4	69618.8	43001.8	41388.4	36796.2	37075.1	41371.4	107065	36796.2
PSMC6	P62333	347767	25542.8	25542.8	60797.9	25542.8	25542.8	25542.8	25974	25542.8	25542.8	25542.8	121677	32501	84530.7	32501	86903.9	65952.4	38750.3	32501	32501	118494	54344.6	24777.1	84365.9	40535.4	24777.1	24777.1	24777.1	24777.1	24777.1
PSMD10	O75832	87960.7	166079	98215.2	215372	137019	112177	209615	112728	75107.6	75107.6	75107.6	407382	347369	267511	342451	208179	469803	158273	284894	108811	230496	169392	146629	220755	184420	139135	296385	195226	139135	139135
PSMD2	Q13200	131452	23305.9	10872.9	40696.2	10872.9	23751.2	59841.8	10872.9	10872.9	10872.9	10872.9	172144	101327	70759.3	37797.8	60840	75381	46243.8	51474.3	55202.2	109469	65341.7	133647	68886.4	48002.7	27368.1	59163.9	45722.7	198155	27368.1
PSMD5	Q16401	187648	322133	265333	364039	155637	277501	220432	182030	155431	340777	67580.3	919197	372581	633223	624833	399833	629861	396390	568224	586168	854906	692091	288256	733669	441534	432128	662149	515994	528912	195557
PSME2	Q9UL46	169076	105605	132847	258052	139371	151671	208300	185524	105605	121091	105605	459407	233045	207865	304345	176203	268727	144707	261939	194883	378790	214050	482443	341367	107893	51080.9	379229	146502	409076	277871
PSMF1	Q92530	215059	779739	365650	838227	254392	506896	485745	169467	204157	594729	167342	1990000	642765	1170000	1250000	903300	1320000	766542	1160000	947130	1460000	1290000	642274	1800000	663096	428171	1020000	510658	1600000	462493
PTGDS	P41222	460772	413768	413768	474494	504183	427371	461055	501467	430412	485483	413768	256941	177538	177538	177590	311354	257539	317268	332358	309244	492825	177538	430091	682996	435181	320296	358854	205651	432799	490526
RAB18	Q9NP72	167709	94166.4	94166.4	154450	94166.4	143460	94166.4	130333	94166.4	173182	94166.4	297631	165846	165846	191429	283580	269141	200675	282930	165846	215668	205752	191733	174582	265209	236806	285062	218264	112674	112674
RAB1A	P62820;Q9H0U4;Q92928	201051	479862	430285	248017	443859	272819	295475	283409	288781	386282	210081	505541	701231	687955	415526	422439	566545	388243	506471	398858	583101	429534	342804	433197	611578	313043	469459	295603	591313	130610
RAB5B	P61020	97843.7	97843.7	172923	224196	97843.7	193241	167903	248155	116993	97843.7	97843.7	612952	572082	167103	390853	167103	330371	257439	297003	215877	318796	167103	110029	338516	468419	295983	416623	258551	204630	110029
RAB6B	Q9NRW1	950303	667588	748547	667588	667588	728189	1100000	1110000	667588	742066	667588	1640000	1420000	1380000	2130000	1280000	1190000	803007	1070000	803007	803007	1030000	1550000	1480000	1610000	912187	1690000	1630000	1130000	789824
RAC1	P63000	157500	367815	331712	442346	157500	201117	564527	362543	157500	295375	157500	914452	468836	446730	693959	568129	737177	525613	509290	394918	761818	344100	390896	807295	794320	424534	798059	434813	692931	377156
RAN	P62826	1590000	3580000	2920000	5230000	741316	2460000	4590000	1900000	1570000	4400000	1010000	20200000	10700000	14500000	12000000	13600000	15000000	8260000	12800000	11400000	17400000	13800000	5190000	22300000	9180000	7320000	17300000	11200000	10900000	3740000
RHOA	P61586	457623	496990	377891	483134	399551	384827	447287	525489	188170	525134	243799	1140000	1090000	876265	499588	819897	1440000	562955	643292	496822	884844	538246	444507	623534	954699	564413	493867	506364	250920	205129
RIC8A	Q9NPQ8	95461.3	151940	95461.3	293439	95461.3	175383	164728	95461.3	95461.3	131227	95461.3	607019	595434	499416	555740	420277	530307	144644	588999	252177	243049	491246	234638	395585	234638	245763	699380	285688	347455	234638
RNPEP	Q9H4A4	430527	329992	575287	184052	551190	527928	244369	474212	311028	295828	344195	505685	656076	330906	255899	472069	424068	432046	453694	389124	401434	279845	218595	251624	218595	298367	298512	294293	226572	274980
RPS10	P46783	10041.5	10041.5	10041.5	10041.5	10041.5	10041.5	28367.1	10041.5	10041.5	10041.5	10041.5	59740.4	54703	61203.2	19227.6	55308.9	105129	22305.6	19227.6	21895.4	87680.2	19227.6	23352.9	11784.5	11784.5	32920.1	28664.1	34728.3	18635.9	11784.5
RPS15A	P62244	88714.1	88714.1	88714.1	88714.1	88714.1	88714.1	88714.1	88714.1	88714.1	88714.1	88714.1	89703.2	115293	93373.9	19028.7	65926.3	199163	19028.7	19028.7	19028.7	155823	39848.5	55331.2	55331.2	55331.2	55331.2	148133	55331.2	55331.2	55331.2
S100A4	P26447	282895	383216	387095	166674	268743	431732	166674	166674	271866	313710	166674	583422	479491	1580000	492512	448705	705531	359648	530212	211377	400081	355324	336532	454336	303102	923463	541780	550148	303102	303102
S100A8	P05109	339554	802134	1250000	1780000	739350	611691	867961	778675	518350	605006	495179	16200000	9860000	1780000	1840000	2280000	22300000	1470000	1440000	2580000	9000000	2040000	754547	926271	771683	1300000	714906	753406	2790000	484448
S100A9	P06702	299797	120894	172163	322826	356991	115746	113952	134356	237449	274871	224420	1460000	1210000	270896	621644	612280	2080000	246496	168092	424784	1540000	466462	145853	267375	123873	533025	149223	262649	888335	153120
SEC14L4	Q9UDX3	104648	238892	188852	261249	104648	164040	220198	149904	104648	204486	104648	716957	637014	504024	528942	436040	513328	315100	602250	437268	734012	488926	755487	586882	362796	143490	788366	376206	712208	348578
SERPINA3	P01011	23700000	30600000	28400000	30500000	24200000	38800000	82900000	23900000	22200000	21000000	31500000	14300000	11200000	15800000	10600000	16100000	15300000	20300000	18900000	18500000	12100000	18700000	19100000	16300000	22000000	17200000	10800000	12700000	20400000	18100000
SERPINA5	P05154	1010000	1140000	624966	1130000	1080000	937633	777136	810632	1050000	1360000	790371	1240000	1130000	1320000	826807	1560000	1410000	1460000	1260000	1240000	1610000	1390000	1630000	984837	1080000	1260000	1320000	1030000	1140000	1070000
SERPIND1	P05546	7050000	6590000	4040000	12100000	4370000	16500000	5080000	3750000	5220000	4130000	3520000	6740000	8600000	10800000	11100000	7600000	8770000	10000000	5610000	8440000	10200000	6540000	10400000	14800000	6610000	16600000	12500000	21200000	5390000	8300000
SERPINE1	P05121	341888	42843.2	168047	268561	42843.2	183987	415397	42843.2	125228	206202	187973	43335.6	43335.6	43335.6	43335.6	101891	43335.6	43335.6	104867	43335.6	85535.4	43335.6	313951	166211	91694.6	91694.6	91694.6	91694.6	95852.6	99371
SERPING1	P05155	63500000	77400000	74400000	52900000	46200000	57400000	66500000	70500000	38100000	61200000	60700000	64900000	64800000	48500000	18200000	57400000	70200000	56900000	83700000	53300000	53200000	45300000	28600000	30800000	42900000	39300000	25500000	34600000	34600000	50400000
SMOC1	Q9H4F8	26913.3	26913.3	125412	104439	484755	26913.3	53214.7	292344	26913.3	92667	124161	21784.1	21784.1	21784.1	21784.1	21784.1	21784.1	21784.1	21784.1	21784.1	21784.1	21784.1	12930.1	65334.9	33297.2	12930.1	12930.1	17273.8	12930.1	12930.1
SMPD1	P17405	734228	1230000	907077	1250000	1490000	1840000	2190000	864784	1070000	1390000	1530000	930052	1050000	801365	332523	764165	743167	1060000	1040000	1070000	1010000	668503	1390000	1520000	1330000	1800000	2520000	1440000	698489	1800000
SNCA	P37840	1540000	4950000	2140000	3580000	1770000	1700000	2330000	1790000	1330000	3250000	773890	12200000	10400000	16000000	8140000	5550000	11000000	4790000	9540000	9380000	13700000	15600000	3130000	10400000	5140000	2980000	6090000	3910000	16600000	2730000
SPARC	P09486	43400000	4070000	9900000	23800000	15200000	18100000	31900000	15800000	2840000	6700000	23800000	11600000	4880000	4630000	717075	7300000	4180000	5560000	3400000	2370000	7960000	3190000	8330000	5560000	2440000	1810000	2170000	2100000	13700000	8340000
SPP2	Q13103	18500000	23800000	12800000	14000000	11000000	15700000	14500000	17200000	28900000	11800000	14800000	25600000	14900000	19300000	29800000	22100000	21500000	15600000	24500000	29000000	21500000	24700000	10400000	6950000	11000000	16000000	5530000	13900000	11100000	17500000
SPTA1	P02549	982365	1460000	556455	899025	1250000	1310000	468794	598382	231658	426172	361766	1190000	1530000	1040000	1850000	873551	772785	1150000	844934	380723	380723	624230	1660000	1590000	799110	1930000	2160000	1770000	799110	1480000
SPTB	P11277	641370	1310000	620957	981504	1010000	574458	574458	574458	789879	721508	574458	1360000	2090000	2040000	1420000	970172	1700000	1390000	678084	1380000	1830000	1010000	1090000	1840000	2330000	1830000	1310000	928138	318836	1210000
ST13	P50502;Q8IZP2;Q8NFI4	1120000	1650000	1580000	2500000	703171	1360000	2530000	1320000	833389	1800000	700777	4550000	3400000	3510000	1080000	2270000	2820000	2010000	2380000	2270000	4530000	3560000	2080000	4450000	1950000	1310000	2060000	1680000	4060000	854483
ST6GAL1	P15907	3560000	3210000	3980000	4060000	3670000	3750000	3770000	3390000	2780000	2220000	4400000	2830000	2800000	3320000	1720000	2660000	2970000	2410000	2770000	2300000	2430000	2120000	3350000	1990000	2460000	2510000	1600000	2930000	2470000	4190000
STIP1	P31948	407700	623347	440875	988791	195036	554160	811575	394537	318275	880539	270036	1900000	1640000	1260000	405824	1190000	1610000	1050000	1210000	1160000	2390000	1480000	808068	2130000	862551	535295	1070000	602821	1230000	260913
TAX1BP1	Q86VP1	1430000	2130000	861166	1710000	646574	1680000	1610000	1630000	301256	301256	301256	742250	2890000	2480000	5270000	2130000	2280000	2210000	811834	388169	428388	388169	2270000	2540000	1140000	3360000	2530000	3170000	716878	3300000
TCP1	P17987	691103	805064	344524	755978	171276	299174	563770	262285	250742	171276	171276	1530000	1210000	972926	2190000	748608	860046	620624	748188	658403	1160000	1230000	651977	2530000	678568	546494	903290	833628	907251	326640
TFRC	P02786	6530000	832701	5790000	545255	1730000	1310000	1260000	2100000	1140000	849461	1700000	2430000	2060000	661160	1540000	17600000	2360000	1550000	1890000	2380000	2470000	771990	437982	1420000	919123	957994	1010000	877498	363197	690215
TGM3	Q08188	65895.3	65895.3	97197.4	65895.3	649709	65895.3	71584.9	81091.1	65895.3	65895.3	170374	188041	124596	90305.6	168522	198319	151832	51736.9	159250	250753	206644	176495	29176.1	77414	216736	99345.4	29176.1	29176.1	29176.1	29176.1
THBS4	P35443	1350000	1230000	1390000	1340000	1670000	1170000	1180000	1010000	1410000	1850000	802719	1680000	1920000	2000000	1420000	1710000	2260000	2540000	2000000	1750000	2520000	1410000	2240000	2090000	2240000	2320000	2380000	1970000	2210000	2130000
TIMP3	P35625	1910000	457858	434301	1270000	399622	719862	1650000	1520000	294072	378470	1880000	362490	497546	401239	167987	342774	194969	319004	281892	167987	424393	167987	410906	350018	269008	362134	190653	215614	433443	491535
TSKU	Q8WUA8	219175	219175	226291	363262	609457	311081	393689	273410	386731	264496	319651	137896	198882	353227	476211	515925	137896	622233	313638	137896	547139	387407	602790	337989	530774	1690000	523391	1580000	570412	925254
TUBB6	P04350;Q9BUF5	1100000	234069	107894	20419.3	20419.3	211920	164245	20419.3	20419.3	20419.3	20419.3	1210000	984777	429780	406521	242657	437133	207353	158930	90443.1	243917	266647	970863	358037	565431	358037	358037	358037	358037	358037
UBA5	Q9GZZ9	55190.6	95386.4	123581	283203	55190.6	55190.6	194827	315144	55190.6	229950	55190.6	500829	484084	517863	306717	292299	290521	530206	317712	216832	524178	349027	248623	537468	97732.1	140879	422098	242760	600787	200723
UBE2N	P61088	43352.8	43352.8	43352.8	43352.8	43352.8	43352.8	63699.9	43352.8	99892	56007.2	43352.8	187468	138098	130774	61662.3	117584	141829	60847.4	37963.9	53192.3	165276	129620	41257.6	81230.2	55396.8	41155.4	72246.3	41155.4	82301.4	41155.4
USP14	P54578	815578	1110000	1370000	1230000	307096	782239	1540000	495582	307096	1460000	307096	3290000	2960000	3640000	1020000	1630000	1610000	2020000	1610000	1660000	2920000	2400000	989713	3830000	749350	710364	2480000	2170000	1730000	561795
USP5	P45974	260992	112676	227492	473036	112676	142272	258247	188203	152866	379747	112676	598045	435205	395829	324169	382000	353393	331225	364007	430028	893956	696828	258298	592003	324119	258298	459214	278031	672298	258298
VCL	P18206	2260000	1780000	1820000	1840000	2390000	1940000	1630000	2120000	2570000	1920000	1660000	1490000	1380000	1200000	1400000	1460000	1770000	1650000	2130000	1190000	1300000	1280000	1540000	1320000	1980000	1680000	1610000	2210000	739043	970527
VPS4A	O75351;Q9UN37	103331	103331	167102	240468	103331	103331	208542	103331	103331	112812	103331	539751	535942	256390	273278	237399	567355	197338	231785	308117	414572	330299	166963	277325	270680	76760.9	252225	242236	170726	76760.9
VTA1	Q9NP79	156917	156917	156917	156917	156917	156917	156917	156917	156917	197578	156917	349486	252694	329514	208532	174950	365579	194104	174950	274332	452593	174950	253355	452668	253355	253355	253355	253355	258554	253355
XPO1	O14980	658948	31911.3	31911.3	87228.9	31911.3	31911.3	94842	31911.3	156520	138874	31911.3	411425	157589	191775	333565	135997	262669	91266.8	120312	190523	306860	233960	76594.2	274273	110204	76594.2	235499	107716	126537	76594.2
YKT6	O15498	209173	336548	118497	418885	200127	245318	277407	184950	158538	213395	83060	874435	682964	513556	751037	478352	844442	460177	686017	473054	538966	683581	295135	438944	446762	281146	521827	278556	456014	197974
YOD1	Q5VVQ6	32131.6	32131.6	32131.6	181848	119484	32131.6	32131.6	32131.6	32131.6	74306.4	32131.6	113334	162964	118468	92266.7	104398	91349.6	164021	133007	114935	139482	190906	64489.7	139730	108134	17841.5	178489	55466.8	185059	17841.5

## Sheet: Table S7
Tab Name	Description
Table S7	Top 10 proteins with marked upregulation or downregulation during malignant progression from HC to CRC. The associated AUC values are reported alongside.
Column Name	Description
CRC vs HC	Comparisons between different groups
CRC vs Polyp	Comparisons between different groups
CRC vs Polyp	Comparisons between different groups
AUC	Area under the receiver operating characteristics curve
Top 10 Proteins	Top 10 proteins based on AUC value
CRC vs HC		CRC vs Polyp		CRC vs Polyp
Top 10 Proteins	AUC	Top 10 Proteins	AUC	Top 10 Proteins	AUC
RAN	1	THBS4	1	GPX3	1
SERPINA3	1	SERPINA3	0.989	MMP9	0.977
YKT6	1	HPX	0.983	ENPP2	0.966
APOA4	0.992	APCS	0.96	SPP2	0.955
DDI2	0.992	ANTXR1	0.955	YKT6	0.955
HAGH	0.992	RAN	0.955	S100A8	0.92
SNCA	0.992	NOTCH3	0.943	HAGH	0.898
ANTXR1	0.983	ANTXR2	0.938	APOC4	0.886
ARF1	0.983	APOA4	0.92	BNC2	0.886
CAND1	0.983	DSG2	0.92	CDH2	0.886

## Sheet: Table S8
Tab Name	Description
Table S8	The models’ performance comparison for predicting disease
Column Name	Description
Model	The algorithms of different machine learning models.
Features	10-protein biomarker panel
Training Dataset	The training set constitutes 70% of the entire dataset.
Validation Dataset	The training set constitutes 30% of the entire dataset.
Model	Features	Training Dataset	Validation Dataset
Classification Tree	10/826	0.727	0.625
Random Forest Model	10/826	1	1
Naive Bayes Model	10/826	1	1
Support Vector Machine (SVM)	10/826	1	1
K-Nearest Neighbors (KNN)	10/826	1	0.875
Backpropagation Neural Network Model	10/826	1	0.875

## Sheet: Table S9
Tab Name	Description
Table S9	Clinical information of samples used in the single-blind validation cohort.
Column Name	Description
HC	Healthy control
CRC	Colorectal cancer patients
Polyp	Polyp patients
Characteristics	Patient’s age and gender information
Characteristics	HC	CRC	Polyp
Male	3	6	5
Female	7	4	3
Age(years) Median(min-max)	34(24-53)	56(47-84)	62(45-73)

## Sheet: Table S10
Tab Name	Description
Table S10	The combined dataset of discovery cohort and single-blind validation cohort was used for biomarker discovery
Column Name	Description
Genes	Gene names corresponding to quantified proteins
UniProt ID	UniProt ID corresponding to quantified proteins
C1-C21	The numbers for colorectal cancer patients
H1-H21	The numbers for healthy volunteers
P1-P16	The numbers for polyp patients
Genes	Uniprot ID	H1	H2	H3	H4	H5	H6	H7	H8	H9	H10	H11	H12	H13	H14	H15	H16	H17	H18	H19	H20	H21	C1	C2	C3	C4	C5	C6	C7	C8	C9	C10	C11	C12	C13	C14	C15	C16	C17	C18	C19	C20	C21	P1	P2	P3	P4	P5	P6
A1BG	P04217	14400000	2200000	2480000	3860000	4360000	3000000	2660000	3560000	3170000	3150000	2830000	2500000	1910000	2580000	3270000	2220000	1510000	3080000	3490000	3970000	3660000	3840000	3190000	4040000	3080000	5710000	4700000	5650000	3740000	3010000	3450000	4060000	3890000	2470000	2670000	4110000	2710000	4100000	4330000	3390000	4710000	3830000	3290000	5030000	4730000	3740000	2400000	2840000
A2M	P01023	14800000	8740000	9760000	12300000	13400000	14100000	16000000	15800000	20500000	11800000	22100000	19900000	12500000	26100000	15500000	28200000	12800000	21500000	21900000	17900000	14100000	10400000	11000000	6250000	6040000	12200000	11000000	7410000	10900000	22500000	11000000	12200000	12100000	17800000	11000000	11200000	12800000	12800000	11100000	15600000	11700000	9680000	10200000	16900000	12600000	12200000	9890000	9820000
A4GALT	Q9NPC4	154097	232902	184798	305716	227078	176030	233154	169573	212315	224537	152627	179244	174556	130800	172611	205308	214938	224140	262001	308327	230416	127119	125225	175217	133809	166835	89534.7	94089.4	198388	151339	178896	69616.3	162089	88650.7	69616.3	96777.1	118200	203552	131030	128589	123604	201030	244964	219081	229808	212791	211669	280429
ABCB9	Q9NP78	3780000	2740000	3110000	1880000	2100000	2530000	3070000	2280000	2790000	3060000	2330000	3070000	2120000	1880000	3620000	3470000	2850000	2890000	3190000	1940000	3060000	2790000	4020000	1730000	2130000	1730000	2630000	2290000	3090000	1730000	2940000	1730000	4190000	4170000	4780000	2670000	4360000	3540000	5010000	3360000	5950000	5410000	2380000	1800000	1860000	3770000	1790000	1790000
ACTA2;ACTG2	P62736;P63267;P68032	388441	552225	489438	138160	302372	316045	538494	322255	138160	432637	411310	525079	769245	138160	281080	2180000	487583	220942	138160	138160	267564	940669	904205	372841	600902	147921	337395	722715	399111	572521	637590	665959	147921	362237	721321	1140000	300517	544110	309072	310931	267541	337630	635829	509512	1100000	177935	152665	324966
ACTB	P60709;P62736;P63261;P63267;P68032;P68133;A5A3E0;Q6S8J3;P0CG38;P0CG39	8120000	6410000	7370000	4830000	7160000	6260000	9320000	6600000	4440000	9370000	6340000	8220000	5760000	4290000	8930000	64500000	5760000	8400000	5420000	4740000	8300000	9030000	9270000	8440000	6980000	14900000	7840000	12600000	10300000	10400000	9740000	8360000	6100000	11400000	6920000	37700000	7580000	12300000	8860000	8050000	6480000	7560000	8260000	7590000	18100000	6250000	3920000	8210000
ADA2	Q9NZK5	17100000	12500000	6850000	3580000	9350000	12200000	9330000	18300000	8780000	6930000	7770000	1200000	1200000	1750000	1200000	6190000	1430000	1200000	2520000	1200000	3550000	11500000	9020000	12400000	6280000	9060000	9130000	8090000	10500000	5990000	6130000	8670000	1600000	1910000	1730000	1600000	2450000	1600000	2590000	1970000	2280000	3480000	4380000	4480000	8050000	10400000	5670000	6490000
ADAMDEC1	O15204	178424	367516	184289	92743.4	125055	143180	143705	152517	92743.4	200622	92743.4	181176	136117	145157	113491	92743.4	301635	109744	207337	153663	124923	65147.7	179990	132888	65147.7	92272.7	142103	171077	117049	65147.7	93902.6	65147.7	222696	230212	179234	132730	93828.2	182344	148365	180848	95237	76387	237210	253581	114616	196079	84478	221444
ADAMTS13	Q76LX8	5110000	4570000	5130000	2780000	4840000	4140000	7200000	4990000	5420000	4550000	5290000	4500000	3910000	6280000	2930000	4300000	5740000	4150000	5520000	4180000	3860000	6490000	4410000	5880000	5880000	3770000	5870000	3560000	4770000	5500000	5310000	3430000	4270000	5500000	4820000	1950000	4330000	6400000	4450000	5240000	3910000	3980000	4690000	2920000	4390000	5820000	6390000	4140000
ADAMTSL2	Q86TH1	1110000	1430000	1220000	343669	1410000	1320000	1750000	1330000	834657	902116	1140000	983231	550379	850419	960613	1040000	1180000	1290000	1140000	1180000	996042	1600000	1100000	1960000	1280000	983965	1230000	1980000	1720000	1570000	1300000	2390000	1370000	1040000	935341	1600000	1370000	1440000	951452	1130000	1140000	1030000	1600000	1860000	1670000	1030000	1350000	1030000
ADGRA3	Q8IWK6	186228	464128	520435	585041	387537	186228	281943	186228	186228	186228	362041	433865	409923	253199	452269	186228	186228	312091	344992	468762	236856	464332	345595	154063	527124	154063	398026	154063	154063	230118	154063	154063	307809	331010	210629	154063	212868	270154	288179	294357	155035	154063	359483	342084	401444	730896	389548	442260
ADGRF5	Q8IZF2	1300000	1150000	1250000	1920000	608870	1180000	1290000	875735	869787	670420	903420	713798	673478	930366	679170	418583	736281	933849	778400	858791	680220	1490000	1150000	1200000	846029	1030000	1150000	793827	1370000	1320000	886451	855414	604911	611927	1150000	933327	633364	920154	776229	1000000	543725	1090000	998201	1110000	970746	1030000	982055	1020000
ADGRG6	Q86SQ4	1510000	1560000	777135	1300000	1710000	1290000	1150000	1560000	1260000	1520000	1480000	2800000	1880000	1970000	3440000	1450000	3010000	2980000	2450000	1770000	1850000	1930000	1370000	1850000	2300000	1380000	2580000	1660000	2490000	1550000	2120000	1630000	3630000	2770000	2810000	4460000	3410000	2510000	2530000	3220000	2850000	3700000	2050000	1530000	1690000	1850000	751049	2400000
ADGRL4	Q9HBW9	729293	593338	707716	287920	297460	826063	743775	567342	694502	319233	592385	273886	320003	308821	408902	308215	407836	612123	760364	616330	554219	1200000	882655	670123	500963	653402	606779	525499	510783	849279	927514	348145	288801	321637	493333	250114	255929	957120	458531	677761	191081	686914	683746	496224	442144	1250000	552949	520457
ADH1B	P00325	492709	2740000	962091	1640000	1250000	1130000	656202	853489	403564	745751	333553	1110000	16500000	228225	1180000	264169	180550	490181	238688	3210000	441680	951965	1020000	850302	497020	498839	630692	628352	620379	324033	902999	308232	415487	868731	1340000	204338	286676	125871	236908	1090000	125871	323633	1070000	1760000	1170000	133999	3930000	1050000
ADH4	P08319	733433	7320000	1240000	2760000	3070000	1420000	728842	1670000	922831	1370000	574649	1820000	58400000	820019	3140000	503025	1220000	1340000	512397	7900000	1030000	2460000	1390000	1820000	1660000	1930000	1940000	1270000	1730000	593503	3340000	492116	795831	1110000	3550000	314007	569578	574541	947993	2360000	807586	1020000	3550000	7920000	5490000	1670000	15800000	2960000
ADIPOQ	Q15848	347994	121741	456351	220645	363103	332759	462105	490918	334203	374341	583452	494727	354812	417809	98407.1	476583	470932	419303	339561	371695	242108	325563	410674	164334	322934	339167	329921	306437	384670	443250	122146	353446	250991	309712	122146	122146	184922	364043	273969	279544	164369	230217	199538	211846	370577	443554	280917	510804
AFM	P43652	28300000	50400000	41800000	21200000	37000000	34800000	45900000	34000000	31600000	31800000	33400000	34000000	30200000	26900000	28900000	28100000	23000000	25700000	25100000	25400000	23000000	35800000	30300000	41200000	39100000	24300000	36000000	23100000	43600000	33500000	41200000	16900000	37700000	66400000	28300000	11700000	23300000	37400000	34400000	34900000	21100000	23800000	37400000	37900000	52600000	31800000	32800000	37100000
AGT	P01019	50600000	63500000	45800000	68000000	52400000	49900000	107000000	82500000	56300000	61000000	46800000	56100000	48000000	42600000	44900000	32700000	28900000	32300000	27600000	38800000	27400000	54400000	64900000	67800000	56200000	83400000	84300000	49300000	46900000	76700000	74300000	44300000	57100000	32600000	24200000	36900000	31300000	41200000	46800000	36800000	34400000	31600000	85100000	36300000	54200000	66500000	96200000	39800000
AHSG	P02765	37000000	54100000	48000000	70300000	51300000	39400000	72400000	42000000	56700000	40400000	33000000	42200000	56000000	46300000	68800000	26300000	41000000	69200000	49800000	78100000	42100000	40900000	49700000	34400000	71100000	41800000	68600000	25200000	31300000	30800000	30900000	31300000	50700000	34300000	40500000	10900000	26200000	46200000	53500000	37000000	33900000	37400000	32800000	54800000	44900000	43000000	30200000	74600000
AHSP	Q9NZD4	561284	1710000	399315	107040	180222	225794	301116	284049	266238	716924	497092	231711	81953.1	1470000	654054	728427	596329	389379	730988	284181	633497	98134.4	183602	135296	247704	37812.2	96411	81836.3	80685.6	37812.2	219822	37812.2	37812.2	146576	563027	239692	69572.8	37812.2	395389	1050000	37812.2	388942	181448	121522	129998	204948	295141	138417
AK1	P00568	758859	346537	353646	264606	395173	508358	261402	433848	324723	452047	346243	162777	197059	261325	171002	266763	186780	174165	202756	184214	201038	79164.3	79164.3	79164.3	79164.3	79164.3	79164.3	336161	79164.3	79164.3	249303	79164.3	79164.3	79164.3	162927	79164.3	79164.3	79164.3	120964	131624	79164.3	79164.3	331709	494425	292225	355865	565817	181373
ALB	P02768	3480000000	3540000000	3620000000	1680000000	2920000000	3370000000	3450000000	3330000000	3690000000	3760000000	4120000000	3890000000	3440000000	4560000000	4030000000	3600000000	4650000000	3520000000	3820000000	3080000000	3480000000	2840000000	3210000000	2790000000	3000000000	2310000000	2350000000	2660000000	2620000000	3260000000	3380000000	1910000000	3190000000	3060000000	3200000000	2070000000	2940000000	3160000000	3850000000	3930000000	2480000000	2910000000	3850000000	3600000000	3400000000	2910000000	2840000000	3370000000
ALDH1A1	P00352	1280000	1280000	610953	921836	631789	740530	480153	1010000	366850	1160000	390107	556372	2440000	334239	761338	1310000	488018	388322	358809	1150000	533552	406932	470144	301350	676711	475151	520707	556053	333145	179404	526725	180929	229428	118078	609557	394083	127028	274680	537802	424937	239139	307863	775088	1220000	1010000	445459	1610000	433877
ALDOB	P05062	736923	1660000	926031	723420	881163	673418	936774	888111	770969	2190000	1210000	573202	2620000	344953	1630000	344953	350585	586344	409672	1690000	1150000	912587	827161	690269	797016	969328	883270	827999	1120000	782959	1830000	605258	616452	563481	613389	486360	261591	261591	669659	924217	686869	783498	1320000	1150000	1010000	931723	1920000	923699
ALPL	P05186	81752.8	180257	330153	440204	380843	199265	204088	81752.8	81752.8	575135	1330000	376144	81752.8	185987	184270	81752.8	514140	84076.8	369782	525157	455516	456579	83618.7	74453.3	28103.7	217620	135344	123819	81381.2	28103.7	796220	944277	347053	28103.7	231899	165636	128481	107294	152517	245215	248418	28103.7	285978	111989	448154	77910.6	45645.7	45645.7
AMBP	P02760	43700000	58400000	60500000	34100000	57300000	50900000	59100000	56400000	61600000	69400000	47800000	46300000	81400000	73000000	72500000	95400000	46600000	53400000	81200000	49800000	56100000	52100000	57900000	55500000	57600000	52500000	48000000	52700000	59300000	41600000	55300000	29100000	66000000	55700000	52200000	22900000	45700000	64900000	61400000	61300000	44400000	66400000	47600000	62500000	57900000	52400000	44300000	54600000
ANGPTL3	Q9Y5C1	4760000	3090000	7550000	2500000	7600000	4350000	5420000	6210000	5260000	3820000	4980000	5890000	4100000	3580000	3400000	3490000	3870000	3660000	4040000	4100000	7270000	5450000	6490000	5690000	4410000	5390000	5260000	5630000	6830000	4860000	5330000	3680000	4950000	3200000	3120000	4420000	3440000	3880000	3460000	4960000	5040000	3050000	4740000	4110000	5150000	9810000	6200000	8590000
ANGPTL6	Q8NI99	7690000	4570000	6440000	2990000	6910000	5580000	5800000	6060000	6330000	4720000	6500000	6970000	3550000	5700000	5890000	3410000	6040000	4470000	5060000	3780000	3600000	8050000	6230000	4210000	4420000	4610000	4390000	3390000	5480000	5840000	5210000	6030000	5000000	4820000	4960000	1880000	5950000	6470000	4330000	4600000	3120000	4700000	5790000	3420000	6080000	6020000	4800000	6540000
ANGPTL8	Q6UXH0	581580	555102	716961	792929	418730	766593	226527	245966	226527	379482	272992	640847	234671	232267	341703	226527	276955	668716	389212	516782	323981	314255	379710	350919	91707.9	407497	407489	91707.9	627176	688843	895335	91707.9	349419	463535	651135	137182	459372	494069	469453	293244	535121	384313	1270000	1500000	402935	507272	980237	1690000
ANPEP	P15144	393117	349478	874530	198317	383473	545217	237257	855890	306722	374175	240539	372620	651487	228620	3570000	298687	141472	227837	227025	516674	243992	503180	128692	368015	325025	1120000	210710	347981	229318	321266	278142	1650000	187641	128692	516412	1020000	227777	351467	289134	320167	341273	564076	549890	864585	371975	856807	418424	446844
ANTXR1	Q9H6X2	5320000	4040000	7350000	9740000	6300000	8880000	7390000	8570000	4710000	4760000	4480000	8210000	7290000	6770000	4390000	6950000	5400000	5660000	7370000	7360000	5560000	4090000	3530000	2630000	3210000	3220000	2440000	2000000	3160000	4070000	3550000	2170000	4530000	3140000	2920000	577278	2910000	3790000	4700000	3650000	2370000	1430000	4650000	4030000	4540000	8940000	4170000	7440000
ANTXR2	P58335	5250000	3730000	6060000	7310000	4400000	6610000	5720000	9150000	4500000	5410000	3550000	5570000	5510000	4210000	3390000	5030000	3750000	4550000	5240000	5110000	5030000	2820000	2470000	1990000	1980000	2520000	1430000	1930000	2480000	3550000	3760000	2250000	3990000	2190000	2250000	479732	2240000	3030000	4460000	3470000	1560000	1310000	4590000	2850000	3550000	8350000	4870000	5880000
ANXA2	A6NMY6;P07355	313913	545078	335512	349202	162946	206455	72495	131829	234184	234076	139700	403261	92407.5	337168	364455	72495	295130	343499	253149	248598	234022	3710000	211129	185221	122911	1440000	134259	97977.4	88717.3	177767	80147.4	77696.4	77696.4	145872	332420	77696.4	77696.4	77696.4	275514	287341	77696.4	200570	1760000	484352	777039	148203	121416	131956
APCS	P02743	1350000	1290000	1210000	1100000	1140000	905438	1090000	1150000	1320000	1740000	1450000	853906	1420000	865629	1070000	645268	1060000	1250000	673499	924150	1150000	1430000	1950000	2290000	2150000	1810000	1920000	1910000	1450000	1820000	1740000	1720000	1410000	1250000	1720000	1360000	1530000	1050000	967361	1540000	1520000	1390000	1450000	1360000	1570000	953094	1330000	1240000
APLP1	P51693	150130	249037	164846	95395.2	200419	66497.3	266802	197264	179792	80049.5	268773	140048	48097.8	183395	188500	157320	99656.2	62175.8	157190	86823.9	191819	143242	251107	128704	85029.4	141351	248060	116930	143152	331907	145146	82111.9	59773.6	101604	90506.5	124013	78804.9	101669	82812.4	102744	38056.8	99591.9	215172	193362	278125	382796	20630.2	257659
APMAP	Q9HDC9	21500000	34700000	31200000	22900000	37600000	27600000	15900000	47800000	28800000	28500000	24200000	25700000	37400000	23100000	23600000	18000000	39900000	25500000	19900000	36000000	37700000	25300000	27500000	48200000	41800000	33200000	20500000	56000000	33100000	21500000	20900000	41300000	22600000	34000000	25700000	41800000	33500000	25400000	23400000	32400000	29900000	26900000	25200000	22600000	23100000	39000000	35400000	25000000
APOA1	P02647	1970000000	3200000000	3070000000	5440000000	3240000000	2800000000	3060000000	2830000000	2790000000	1930000000	2680000000	2940000000	3320000000	2970000000	2810000000	3140000000	2850000000	2350000000	2720000000	3880000000	3010000000	2400000000	2460000000	1770000000	1960000000	3390000000	2140000000	1480000000	1620000000	1680000000	1630000000	1480000000	2890000000	2550000000	1270000000	1190000000	1650000000	2270000000	2220000000	1840000000	2030000000	1380000000	3150000000	2600000000	2030000000	3920000000	3690000000	3990000000
APOA2	P02652	195000000	357000000	350000000	497000000	315000000	196000000	301000000	210000000	375000000	334000000	311000000	273000000	366000000	390000000	340000000	327000000	249000000	270000000	265000000	355000000	299000000	185000000	255000000	172000000	316000000	285000000	227000000	162000000	177000000	259000000	400000000	188000000	218000000	324000000	225000000	107000000	197000000	190000000	217000000	276000000	184000000	332000000	296000000	421000000	361000000	384000000	442000000	401000000
APOA4	P06727	301000000	618000000	547000000	666000000	454000000	365000000	312000000	499000000	538000000	498000000	427000000	409000000	761000000	539000000	390000000	314000000	525000000	417000000	462000000	453000000	391000000	166000000	115000000	176000000	78200000	311000000	195000000	192000000	196000000	97600000	136000000	136000000	470000000	165000000	186000000	21700000	91500000	166000000	118000000	199000000	211000000	110000000	597000000	573000000	155000000	739000000	589000000	685000000
APOA5	Q6Q788	8810000	12500000	8600000	31300000	12000000	8060000	7350000	12900000	12100000	16800000	18200000	9500000	8900000	11200000	17000000	9360000	15500000	9520000	4880000	24600000	17800000	9750000	23400000	24800000	25100000	26100000	10500000	7340000	9080000	18600000	15800000	8260000	27100000	8150000	13300000	10300000	11500000	17900000	24300000	8780000	19400000	8210000	6700000	5550000	7680000	10000000	18600000	9630000
APOB	P04114	164000000	120000000	114000000	181000000	192000000	133000000	91500000	245000000	366000000	436000000	389000000	398000000	453000000	375000000	262000000	305000000	316000000	433000000	363000000	413000000	309000000	141000000	181000000	189000000	303000000	238000000	155000000	135000000	212000000	386000000	592000000	446000000	309000000	288000000	365000000	488000000	362000000	316000000	378000000	340000000	414000000	317000000	124000000	152000000	179000000	151000000	396000000	133000000
APOC1	P02654	74000000	117000000	117000000	369000000	151000000	104000000	76800000	151000000	88800000	108000000	78200000	106000000	161000000	96900000	113000000	124000000	64900000	79600000	95000000	170000000	86900000	85800000	84400000	72800000	176000000	149000000	130000000	59600000	99700000	52700000	72800000	53700000	99800000	102000000	53800000	31600000	63700000	70900000	80400000	63200000	78900000	75400000	73800000	135000000	93500000	152000000	350000000	197000000
APOC2	P02655	40800000	74900000	46800000	96700000	69100000	55100000	52800000	64800000	33600000	44900000	36500000	62400000	109000000	66100000	103000000	49600000	31700000	51500000	47600000	105000000	64400000	60000000	66800000	49600000	110000000	75400000	83300000	45500000	83800000	39100000	41700000	36500000	89500000	122000000	59000000	31700000	54000000	70500000	68400000	70200000	58900000	77600000	52500000	49700000	37600000	49300000	134000000	69800000
APOC3	P02656	214000000	727000000	395000000	612000000	528000000	329000000	365000000	409000000	399000000	412000000	306000000	453000000	440000000	510000000	493000000	280000000	304000000	402000000	473000000	507000000	371000000	331000000	398000000	224000000	514000000	460000000	462000000	194000000	254000000	344000000	334000000	184000000	551000000	487000000	295000000	194000000	317000000	372000000	423000000	428000000	317000000	622000000	666000000	392000000	313000000	291000000	776000000	480000000
APOC4	P55056	2020000	1990000	1690000	5900000	2540000	1850000	2500000	2490000	1750000	2980000	1790000	2880000	3150000	1980000	3540000	2720000	760573	1310000	1740000	4540000	2330000	2290000	2350000	1830000	3210000	3710000	2750000	1240000	3870000	1650000	1330000	1080000	1850000	2740000	1540000	411547	870353	1660000	2330000	1430000	2270000	940694	1320000	1000000	1100000	1670000	3550000	1330000
APOD	P05090	1410000000	903000000	1210000000	847000000	848000000	1000000000	1290000000	893000000	768000000	1260000000	1340000000	1330000000	1610000000	1310000000	1180000000	1560000000	2160000000	1230000000	1450000000	1530000000	1890000000	1080000000	1080000000	1030000000	1320000000	906000000	1060000000	976000000	1210000000	1110000000	957000000	696000000	1250000000	1140000000	758000000	1160000000	997000000	1750000000	1200000000	1290000000	1020000000	941000000	1550000000	1100000000	1000000000	1290000000	947000000	1700000000
APOE	P02649	330000000	654000000	708000000	2380000000	487000000	512000000	695000000	440000000	537000000	547000000	513000000	303000000	517000000	393000000	719000000	292000000	327000000	460000000	448000000	698000000	770000000	351000000	479000000	310000000	1030000000	802000000	578000000	194000000	539000000	347000000	808000000	363000000	285000000	397000000	186000000	345000000	168000000	288000000	685000000	359000000	442000000	401000000	575000000	484000000	385000000	854000000	1950000000	488000000
APOF	Q13790	3740000	1790000	3290000	3990000	3490000	3060000	2910000	4620000	5430000	5710000	4920000	4660000	3570000	9070000	5880000	5730000	5080000	3620000	3780000	5190000	5590000	4190000	5690000	5400000	5910000	6380000	3980000	4110000	4640000	4320000	4700000	4590000	6100000	5580000	6510000	2690000	4850000	6670000	4670000	5840000	4780000	4210000	4600000	4290000	3180000	5250000	7280000	6080000
APOH	P02749	907743	1710000	1210000	2780000	1510000	1510000	1470000	1020000	2190000	2040000	1940000	1910000	2440000	1950000	3270000	1680000	2150000	2330000	2470000	2840000	2540000	1490000	1800000	1140000	1050000	1640000	1690000	1550000	1260000	1540000	1320000	1480000	2970000	1610000	2020000	1480000	1910000	1990000	3910000	2350000	3340000	2010000	1900000	2010000	1450000	2130000	946378	1920000
APOL1	O14791	174000000	227000000	228000000	242000000	145000000	93700000	170000000	154000000	213000000	179000000	211000000	239000000	278000000	89300000	173000000	105000000	86000000	202000000	185000000	163000000	173000000	180000000	176000000	200000000	207000000	176000000	168000000	78100000	207000000	153000000	117000000	107000000	151000000	115000000	73500000	98600000	94000000	170000000	181000000	100000000	123000000	125000000	129000000	183000000	115000000	212000000	285000000	167000000
APOM	O95445	34100000	25900000	33900000	43500000	32400000	24900000	32800000	28600000	28200000	24100000	26700000	35700000	50400000	49300000	37200000	41000000	31800000	33500000	46700000	42700000	45200000	27700000	31200000	23700000	30800000	39800000	35500000	24200000	28100000	21500000	16700000	16600000	41600000	34400000	24800000	21700000	25300000	31800000	39600000	34200000	32500000	27600000	19100000	30500000	23200000	42400000	39400000	41200000
APP	P05067	219913	160166	136445	83561.4	278567	99458.8	184123	83561.4	83561.4	89089	83561.4	83561.4	83561.4	83561.4	83561.4	235324	95734.6	106133	83561.4	98365	83561.4	706229	132219	172066	418754	262594	420757	823856	370770	82699.6	87040.6	382269	75941.8	164458	69371.2	66927.9	191140	444924	234158	159894	172909	245556	94885.7	104511	94885.7	94885.7	94885.7	178905
APRT	P07741	759183	632817	422262	228338	339654	489177	80195.3	546935	80195.3	221163	162165	241376	180918	176235	80195.3	609335	82904.6	106044	162463	204830	161509	37503.9	37503.9	184960	228463	37503.9	37503.9	37503.9	148194	37503.9	37503.9	37503.9	37503.9	37503.9	216259	70244.6	37503.9	37503.9	37503.9	261349	37503.9	71687.9	88220.6	510904	264389	88220.6	545039	219452
AQR	O60306	595525	80153.6	80153.6	178671	375058	229853	527950	433301	371378	761361	450291	2790000	1430000	1260000	1920000	1590000	2350000	1860000	1900000	1900000	2080000	466629	453345	1260000	869687	275637	512878	855103	565393	1020000	813760	825990	2800000	2710000	3120000	2620000	3570000	2130000	2670000	2780000	3910000	4850000	492456	284837	761748	284837	284837	284837
ARF1	P84077	10200000	6540000	6240000	6440000	5080000	7490000	3800000	6550000	5630000	7980000	8690000	7940000	6520000	8680000	6260000	125000000	6300000	6150000	6420000	7260000	8940000	2750000	2560000	2690000	4990000	2290000	3340000	4220000	2360000	1790000	3290000	1860000	2920000	2890000	5840000	2320000	2350000	4160000	5450000	4880000	2460000	2710000	3740000	8060000	6850000	3250000	8930000	4370000
ARF4	P18085	567797	402536	207793	343175	412390	355215	138692	349494	161215	265347	359080	202173	179631	98742.1	138729	1070000	100665	146909	98742.1	113605	238056	292170	170554	138023	380338	278444	335575	692498	138601	109984	139300	151905	93180.3	152340	144515	97862.6	119881	242717	148817	123914	113287	72612.6	248809	274703	1160000	79496.7	372080	318716
ARF5	P84085	569259	686153	348105	381338	243399	580256	150936	252179	129678	307772	340436	318548	286918	394891	294727	5520000	325853	283213	260754	316227	441541	183850	183936	114050	247200	245721	140225	185422	116799	114050	138502	114050	148866	251093	261539	171153	123572	286233	259521	258073	156433	121266	262552	378561	532787	196745	328407	268250
ARG1	P05089	724728	140106	56444.7	233080	218355	255868	320226	211208	179352	171074	242444	56444.7	130522	83946	462708	153021	132084	551595	371852	121379	56444.7	9006.05	9006.05	237617	58063.4	1490000	50066.1	79165.1	120850	85318	46236.7	92594.3	9006.05	55063.2	315473	9006.05	9006.05	9006.05	95286.8	9006.05	59004.7	262814	78845.3	197738	924294	78845.3	170268	168541
ARSB	P15848	30800000	44400000	43500000	65500000	41300000	57600000	34100000	23800000	37800000	22000000	28900000	23200000	29000000	27000000	23000000	26900000	18100000	17300000	17400000	25600000	18000000	34500000	22100000	25400000	27500000	42500000	27200000	24900000	26600000	22700000	8510000	19300000	24500000	18600000	13600000	8510000	12000000	19800000	15600000	13300000	14800000	8730000	63000000	13200000	28600000	77300000	61400000	66100000
ART4	Q93070	194312	287244	1160000	127957	329545	645350	89626.6	305281	232859	376899	89626.6	89626.6	126272	89626.6	130652	89626.6	89626.6	122429	135430	167106	121859	256248	284367	281954	278510	430141	284033	358532	262719	266877	267730	649476	178566	123206	133522	218062	108773	167931	131664	212347	208918	210435	300788	310656	312160	2840000	284655	209172
ASAH1	Q13510	516901	510807	531158	350270	588237	411532	645439	516613	1250000	820796	585046	796041	350270	350270	533376	661977	767715	350270	350270	481035	350270	553309	600203	541215	805698	534330	616326	851094	660629	809021	1050000	1070000	486692	523345	872102	625202	590678	895153	8834.57	916634	8834.57	613411	515178	360815	830215	269529	473388	482031
ASGR2	P07307	1030000	617475	935881	439238	690675	535946	977434	810209	1030000	1160000	1400000	1590000	1140000	2350000	1110000	1420000	1590000	1490000	2160000	1710000	2180000	1410000	869259	1020000	968192	1140000	669363	847668	508871	1110000	1520000	1740000	1820000	1490000	1120000	3030000	2720000	2170000	1880000	1470000	2990000	2800000	1210000	1020000	1110000	888501	684120	555538
ASPN	Q9BXN1	2000000	3970000	4510000	3200000	3200000	4090000	4100000	4260000	3300000	2670000	2610000	4120000	2960000	3020000	3460000	2250000	2840000	4110000	3920000	4610000	2600000	1850000	2840000	2570000	2050000	2880000	2310000	1530000	1880000	3480000	2160000	2350000	2820000	1260000	2780000	968657	1670000	3620000	2520000	2530000	2120000	1820000	3150000	3330000	2700000	3600000	2330000	6570000
ATG3	Q9NT62	506795	75574.9	341917	75574.9	75574.9	346660	218584	206273	338819	757502	797743	212410	116497	442452	185607	870261	182194	266473	337804	238527	301799	79884.4	79884.4	79884.4	241405	79884.4	79884.4	79884.4	79884.4	79884.4	127086	79884.4	79884.4	80429.9	231021	155208	79884.4	100920	205711	220378	79884.4	79884.4	112948	366136	112948	112948	148519	159362
ATP5F1B	P06576	997361	906546	670268	1740000	844648	892763	662955	935116	1210000	1790000	1270000	676268	544784	177895	426226	524852	244739	185915	220366	175596	312041	1590000	540507	691546	1150000	1160000	625225	631630	774527	1330000	1110000	978053	314133	636430	363527	178871	349379	293845	226459	321740	325952	251969	1130000	766520	815607	1910000	1140000	1130000
ATRN	O75882	1160000	1260000	1210000	470361	1300000	1450000	1880000	1150000	1300000	1460000	1030000	1180000	689835	1090000	1090000	848709	1050000	830411	883931	777551	725055	1240000	1180000	1430000	1190000	997920	1210000	899591	1730000	1750000	1360000	876398	854443	1140000	949112	755676	858559	1290000	1220000	658299	1040000	1010000	1210000	1150000	1630000	1140000	940145	806717
AZGP1	P25311	216292	512168	275336	765037	567674	373080	199459	282855	318563	333289	245658	500040	313219	140098	460773	163262	275673	383650	415231	238027	228806	257643	226326	277006	425385	823132	284333	333163	291103	314806	495093	306711	187149	185555	363944	141058	214996	117349	334668	278510	194406	386168	322437	565669	333851	394935	275116	377280
B2M	P61769	92209.2	233400	277548	175721	44949.8	31772.3	386401	31772.3	31772.3	31772.3	97104.1	139399	238000	47942.7	79285.7	56940.5	242802	50875.9	48238.8	47013.8	31772.3	14522	55013.2	14522	14522	14522	14522	14522	110413	87223.7	25867.3	14522	23491.5	29947.3	14522	218873	133630	45644.4	39761.4	154305	160920	54696	139596	9153.73	9153.73	274547	115143	113657
B3GNT7	Q8NFL0	102560	141006	91435.2	187779	161250	379298	169358	199636	80804.2	151430	96214.3	121110	134343	87140.6	67930.6	67930.6	79804.4	147415	67930.6	67930.6	131274	174577	97381.2	171192	158186	114846	299857	222582	204448	115507	95572.8	98471.9	125830	79315.7	119990	218669	161027	121412	79315.7	108850	79315.7	79315.7	166287	205764	174538	351198	319754	265156
B4GALT1	P15291	158915	225889	231350	439956	206541	194270	138854	142207	127165	225478	89702.9	100347	95813.3	85915.9	143597	82706.1	82706.1	107920	104810	85405.7	82706.1	112217	112708	135886	465105	136555	550522	210669	196388	86641.9	59580.7	146279	154033	19563.8	64349.6	53802.2	55480.2	63524.9	32723.4	61508.6	49400.8	51341.6	158755	377803	153690	380023	102983	593711
BCHE	P06276	4360000	14900000	11200000	14300000	6690000	6430000	12400000	5350000	15900000	20200000	9650000	3800000	10100000	9390000	26400000	19000000	28600000	12500000	10700000	18300000	9670000	3330000	3390000	4740000	5630000	3430000	2630000	2060000	3930000	3810000	8700000	3350000	11300000	4540000	7530000	2790000	3600000	9230000	11200000	5200000	3640000	4550000	9360000	3830000	8170000	13200000	16700000	3050000
BLVRB	P30043	11600000	7310000	8200000	4350000	6570000	8240000	5430000	12000000	5310000	8070000	6600000	7420000	6090000	9280000	5510000	5820000	3830000	6430000	5910000	6350000	10700000	2050000	3770000	2460000	4560000	1980000	2710000	5510000	2750000	1530000	3020000	1250000	1840000	999728	2870000	1350000	952104	1230000	4120000	4330000	1190000	2190000	3410000	9450000	3980000	3950000	6630000	4330000
BMP1	P13497	1580000	1630000	1490000	826765	1500000	1380000	1460000	1410000	1340000	1550000	1550000	1580000	1580000	1230000	1620000	722481	1810000	1040000	1030000	1220000	1480000	1580000	1380000	1920000	1660000	1160000	1130000	1220000	1380000	1410000	1340000	996586	1960000	930433	2250000	762452	1190000	1210000	1100000	1310000	1140000	1550000	2020000	1330000	1980000	925788	1440000	1040000
BNC2	Q6ZN30	91700000	143000000	88800000	45800000	89500000	75200000	76900000	72000000	89200000	94400000	71600000	111000000	89600000	172000000	165000000	50700000	137000000	133000000	178000000	118000000	121000000	109000000	151000000	95200000	132000000	141000000	110000000	77700000	69700000	63000000	109000000	55000000	150000000	112000000	158000000	86400000	95900000	149000000	144000000	181000000	167000000	165000000	157000000	113000000	87000000	152000000	104000000	111000000
BPIFB1	Q8TDL5	3820000	4000000	3670000	4820000	9070000	3780000	5700000	5890000	4500000	4340000	2460000	3210000	6280000	3970000	3040000	3340000	2630000	7960000	4740000	5990000	6170000	6420000	3450000	4850000	3050000	7930000	4130000	2840000	4560000	4780000	3830000	6270000	2450000	8080000	4140000	10500000	2670000	7220000	3650000	5870000	2410000	3060000	6000000	4880000	3040000	7190000	14300000	7420000
C1QA	P02745	4660000	2920000	3400000	4000000	3700000	3270000	3680000	3690000	4230000	3250000	3090000	2860000	2060000	1410000	1960000	2540000	1820000	3330000	2480000	2780000	2020000	8120000	3810000	3100000	2020000	3560000	4760000	5940000	4370000	3520000	2710000	4120000	2590000	3030000	2090000	2340000	3420000	5210000	3430000	2910000	2950000	2380000	2790000	4170000	2820000	2800000	2320000	3750000
C1QB	P02746	2560000	3190000	4770000	5350000	4730000	3320000	4540000	5180000	6200000	3700000	5100000	4610000	3250000	3750000	3850000	3980000	4030000	6230000	4180000	5930000	4730000	8310000	5980000	3960000	4980000	5590000	5610000	5640000	6130000	6080000	3840000	8940000	5400000	3620000	6310000	11600000	5500000	5850000	4180000	5610000	5480000	5490000	3280000	7710000	3990000	3490000	2930000	3180000
C1QC	P02747	1530000	2350000	2370000	2690000	2300000	1640000	2500000	2000000	2730000	2450000	2010000	3060000	2050000	1860000	2370000	1970000	2320000	3270000	1840000	1810000	2200000	2500000	2620000	1540000	1930000	2480000	2400000	2990000	2830000	2080000	2180000	2250000	1930000	2100000	2520000	2020000	3020000	2520000	1660000	2970000	1670000	1460000	2360000	3840000	1920000	1330000	1740000	2030000
C1R	P00736	272000000	296000000	358000000	173000000	342000000	259000000	301000000	312000000	291000000	276000000	306000000	328000000	269000000	278000000	303000000	186000000	358000000	310000000	206000000	247000000	254000000	343000000	464000000	392000000	434000000	354000000	356000000	456000000	326000000	359000000	338000000	357000000	327000000	293000000	446000000	238000000	273000000	367000000	248000000	424000000	319000000	443000000	388000000	352000000	417000000	325000000	327000000	353000000
C1RL	Q9NZP8	45600000	31400000	57200000	37400000	64800000	37200000	66800000	50700000	40800000	55900000	51600000	66200000	40800000	54100000	81500000	43300000	74900000	63600000	67300000	54500000	41800000	64700000	75800000	69000000	52800000	67900000	75200000	80800000	56200000	50200000	78400000	42300000	70300000	64100000	65500000	63900000	68100000	72100000	52800000	82500000	86400000	78800000	62800000	43100000	75900000	46100000	45700000	25100000
C1S	P09871	132000000	147000000	159000000	42100000	181000000	148000000	193000000	153000000	138000000	158000000	117000000	140000000	113000000	123000000	134000000	233000000	176000000	135000000	110000000	78900000	150000000	216000000	235000000	232000000	192000000	161000000	206000000	250000000	206000000	131000000	167000000	180000000	114000000	176000000	160000000	140000000	121000000	185000000	134000000	174000000	166000000	196000000	136000000	134000000	175000000	101000000	125000000	103000000
C2	P06681	4300000	5760000	5240000	3500000	5620000	4490000	6000000	6170000	5670000	5410000	5100000	5950000	5730000	7180000	6650000	3840000	5680000	4700000	5550000	7290000	9110000	5260000	7270000	5730000	5970000	8180000	7320000	9140000	5660000	5710000	6550000	7750000	8230000	7390000	6160000	10800000	7040000	6370000	6150000	7520000	6990000	8410000	5920000	5280000	5540000	5400000	5930000	5250000
C3	P01024	14800000	15300000	13900000	30000000	12900000	14500000	14300000	14700000	22600000	16600000	13400000	14700000	16400000	16600000	16200000	27000000	18000000	20000000	15500000	17400000	13800000	14600000	16300000	17000000	18500000	20800000	21100000	19000000	16700000	12300000	14400000	19000000	16600000	15000000	17200000	13600000	16200000	14700000	15300000	12900000	17300000	14900000	15500000	24900000	14500000	17400000	17600000	19100000
C4A	P0C0L4	2730000	6960000	3620000	3350000	3540000	3660000	2390000	2020000	2440000	3190000	2540000	2460000	3560000	2370000	3920000	8870000	2610000	6830000	3660000	3090000	5640000	4820000	4930000	7310000	4430000	4840000	5110000	2160000	2910000	1440000	2760000	5130000	3690000	3520000	3330000	2510000	3470000	4310000	2790000	3140000	3270000	3110000	2470000	4220000	1420000	3700000	1120000	4110000
[truncated: 548 more rows]
[truncated: 10 more columns]
